# Supplementary material for: Predicting RNA 5‐Methylcytosine Sites by Using Essential Sequence Features and Distributions
Source: Hindawi journal article supplement (doi:10.1155/2022/4035462), 2022-01-01
Supplement: f1 [file 4035462.f1.zip]

**Supplementary Material S2.** Performance of IFS for human m<sup>5</sup>C sites.

**(1) Decision tree**

| <b>Number of features</b> | <b>SN</b> | <b>SP</b> | <b>ACC</b> | <b>MCC</b> | <b>Precision</b> | <b>F1-measure</b> |
|---------------------------|-----------|-----------|------------|------------|------------------|-------------------|
| 1                         | 0.608     | 0.525     | 0.567      | 0.134      | 0.562            | 0.584             |
| 2                         | 0.667     | 0.633     | 0.650      | 0.300      | 0.645            | 0.656             |
| 3                         | 0.683     | 0.608     | 0.646      | 0.292      | 0.636            | 0.659             |
| 4                         | 0.717     | 0.717     | 0.717      | 0.433      | 0.717            | 0.717             |
| 5                         | 0.750     | 0.775     | 0.763      | 0.525      | 0.769            | 0.759             |
| 6                         | 0.725     | 0.708     | 0.717      | 0.433      | 0.713            | 0.719             |
| 7                         | 0.717     | 0.750     | 0.733      | 0.467      | 0.741            | 0.729             |
| 8                         | 0.742     | 0.733     | 0.738      | 0.475      | 0.736            | 0.739             |
| 9                         | 0.783     | 0.717     | 0.750      | 0.501      | 0.734            | 0.758             |
| 10                        | 0.775     | 0.675     | 0.725      | 0.452      | 0.705            | 0.738             |
| 11                        | 0.708     | 0.683     | 0.696      | 0.392      | 0.691            | 0.700             |
| 12                        | 0.733     | 0.758     | 0.746      | 0.492      | 0.752            | 0.743             |
| 13                        | 0.750     | 0.783     | 0.767      | 0.534      | 0.776            | 0.763             |
| 14                        | 0.725     | 0.767     | 0.746      | 0.492      | 0.757            | 0.740             |
| 15                        | 0.767     | 0.808     | 0.788      | 0.576      | 0.800            | 0.783             |
| 16                        | 0.767     | 0.800     | 0.783      | 0.567      | 0.793            | 0.780             |
| 17                        | 0.733     | 0.783     | 0.758      | 0.517      | 0.772            | 0.752             |
| 18                        | 0.725     | 0.742     | 0.733      | 0.467      | 0.737            | 0.731             |
| 19                        | 0.708     | 0.733     | 0.721      | 0.442      | 0.726            | 0.717             |
| 20                        | 0.750     | 0.708     | 0.729      | 0.459      | 0.720            | 0.735             |
| 21                        | 0.750     | 0.692     | 0.721      | 0.442      | 0.709            | 0.729             |
| 22                        | 0.775     | 0.717     | 0.746      | 0.493      | 0.732            | 0.753             |
| 23                        | 0.750     | 0.708     | 0.729      | 0.459      | 0.720            | 0.735             |
| 24                        | 0.683     | 0.725     | 0.704      | 0.409      | 0.713            | 0.698             |
| 25                        | 0.733     | 0.717     | 0.725      | 0.450      | 0.721            | 0.727             |
| 26                        | 0.742     | 0.700     | 0.721      | 0.442      | 0.712            | 0.727             |
| 27                        | 0.700     | 0.692     | 0.696      | 0.392      | 0.694            | 0.697             |
| 28                        | 0.733     | 0.700     | 0.717      | 0.434      | 0.710            | 0.721             |
| 29                        | 0.725     | 0.692     | 0.708      | 0.417      | 0.702            | 0.713             |
| 30                        | 0.692     | 0.650     | 0.671      | 0.342      | 0.664            | 0.678             |
| 31                        | 0.708     | 0.683     | 0.696      | 0.392      | 0.691            | 0.700             |
| 32                        | 0.717     | 0.708     | 0.713      | 0.425      | 0.711            | 0.714             |
| 33                        | 0.708     | 0.717     | 0.713      | 0.425      | 0.714            | 0.711             |
| 34                        | 0.667     | 0.708     | 0.688      | 0.375      | 0.696            | 0.681             |
| 35                        | 0.633     | 0.750     | 0.692      | 0.386      | 0.717            | 0.673             |
| 36                        | 0.683     | 0.650     | 0.667      | 0.334      | 0.661            | 0.672             |
| 37                        | 0.667     | 0.708     | 0.688      | 0.375      | 0.696            | 0.681             |
| 38                        | 0.658     | 0.725     | 0.692      | 0.384      | 0.705            | 0.681             |

|    |       |       |       |       |       |       |
|----|-------|-------|-------|-------|-------|-------|
| 39 | 0.683 | 0.725 | 0.704 | 0.409 | 0.713 | 0.698 |
| 40 | 0.725 | 0.700 | 0.713 | 0.425 | 0.707 | 0.716 |
| 41 | 0.700 | 0.725 | 0.713 | 0.425 | 0.718 | 0.709 |
| 42 | 0.667 | 0.683 | 0.675 | 0.350 | 0.678 | 0.672 |
| 43 | 0.658 | 0.650 | 0.654 | 0.308 | 0.653 | 0.656 |
| 44 | 0.675 | 0.683 | 0.679 | 0.358 | 0.681 | 0.678 |
| 45 | 0.658 | 0.700 | 0.679 | 0.359 | 0.687 | 0.672 |
| 46 | 0.633 | 0.725 | 0.679 | 0.360 | 0.697 | 0.664 |
| 47 | 0.667 | 0.708 | 0.688 | 0.375 | 0.696 | 0.681 |
| 48 | 0.667 | 0.725 | 0.696 | 0.392 | 0.708 | 0.687 |
| 49 | 0.692 | 0.683 | 0.688 | 0.375 | 0.686 | 0.689 |
| 50 | 0.667 | 0.667 | 0.667 | 0.333 | 0.667 | 0.667 |
| 51 | 0.708 | 0.708 | 0.708 | 0.417 | 0.708 | 0.708 |
| 52 | 0.667 | 0.683 | 0.675 | 0.350 | 0.678 | 0.672 |
| 53 | 0.675 | 0.667 | 0.671 | 0.342 | 0.669 | 0.672 |
| 54 | 0.683 | 0.683 | 0.683 | 0.367 | 0.683 | 0.683 |
| 55 | 0.633 | 0.667 | 0.650 | 0.300 | 0.655 | 0.644 |
| 56 | 0.675 | 0.683 | 0.679 | 0.358 | 0.681 | 0.678 |
| 57 | 0.692 | 0.675 | 0.683 | 0.367 | 0.680 | 0.686 |
| 58 | 0.742 | 0.683 | 0.713 | 0.426 | 0.701 | 0.721 |
| 59 | 0.708 | 0.667 | 0.688 | 0.375 | 0.680 | 0.694 |
| 60 | 0.692 | 0.667 | 0.679 | 0.358 | 0.675 | 0.683 |
| 61 | 0.675 | 0.717 | 0.696 | 0.392 | 0.704 | 0.689 |
| 62 | 0.700 | 0.700 | 0.700 | 0.400 | 0.700 | 0.700 |
| 63 | 0.700 | 0.700 | 0.700 | 0.400 | 0.700 | 0.700 |
| 64 | 0.683 | 0.725 | 0.704 | 0.409 | 0.713 | 0.698 |
| 65 | 0.708 | 0.675 | 0.692 | 0.384 | 0.685 | 0.697 |
| 66 | 0.708 | 0.692 | 0.700 | 0.400 | 0.697 | 0.702 |
| 67 | 0.683 | 0.692 | 0.688 | 0.375 | 0.689 | 0.686 |
| 68 | 0.683 | 0.667 | 0.675 | 0.350 | 0.672 | 0.678 |
| 69 | 0.683 | 0.708 | 0.696 | 0.392 | 0.701 | 0.692 |
| 70 | 0.700 | 0.708 | 0.704 | 0.408 | 0.706 | 0.703 |
| 71 | 0.633 | 0.742 | 0.688 | 0.377 | 0.710 | 0.670 |
| 72 | 0.617 | 0.725 | 0.671 | 0.344 | 0.692 | 0.652 |
| 73 | 0.650 | 0.700 | 0.675 | 0.350 | 0.684 | 0.667 |
| 74 | 0.683 | 0.725 | 0.704 | 0.409 | 0.713 | 0.698 |
| 75 | 0.625 | 0.758 | 0.692 | 0.387 | 0.721 | 0.670 |
| 76 | 0.642 | 0.700 | 0.671 | 0.342 | 0.681 | 0.661 |
| 77 | 0.642 | 0.733 | 0.688 | 0.377 | 0.706 | 0.672 |
| 78 | 0.608 | 0.692 | 0.650 | 0.301 | 0.664 | 0.635 |
| 79 | 0.600 | 0.692 | 0.646 | 0.293 | 0.661 | 0.629 |
| 80 | 0.642 | 0.675 | 0.658 | 0.317 | 0.664 | 0.653 |

|     |       |       |       |       |       |       |
|-----|-------|-------|-------|-------|-------|-------|
| 81  | 0.625 | 0.683 | 0.654 | 0.309 | 0.664 | 0.644 |
| 82  | 0.675 | 0.733 | 0.704 | 0.409 | 0.717 | 0.695 |
| 83  | 0.650 | 0.733 | 0.692 | 0.385 | 0.709 | 0.678 |
| 84  | 0.658 | 0.692 | 0.675 | 0.350 | 0.681 | 0.669 |
| 85  | 0.625 | 0.750 | 0.688 | 0.378 | 0.714 | 0.667 |
| 86  | 0.658 | 0.708 | 0.683 | 0.367 | 0.693 | 0.675 |
| 87  | 0.633 | 0.675 | 0.654 | 0.309 | 0.661 | 0.647 |
| 88  | 0.642 | 0.675 | 0.658 | 0.317 | 0.664 | 0.653 |
| 89  | 0.642 | 0.717 | 0.679 | 0.359 | 0.694 | 0.667 |
| 90  | 0.608 | 0.725 | 0.667 | 0.336 | 0.689 | 0.646 |
| 91  | 0.667 | 0.717 | 0.692 | 0.384 | 0.702 | 0.684 |
| 92  | 0.675 | 0.717 | 0.696 | 0.392 | 0.704 | 0.689 |
| 93  | 0.642 | 0.717 | 0.679 | 0.359 | 0.694 | 0.667 |
| 94  | 0.650 | 0.675 | 0.663 | 0.325 | 0.667 | 0.658 |
| 95  | 0.667 | 0.683 | 0.675 | 0.350 | 0.678 | 0.672 |
| 96  | 0.617 | 0.692 | 0.654 | 0.309 | 0.667 | 0.641 |
| 97  | 0.650 | 0.708 | 0.679 | 0.359 | 0.690 | 0.670 |
| 98  | 0.650 | 0.733 | 0.692 | 0.385 | 0.709 | 0.678 |
| 99  | 0.650 | 0.708 | 0.679 | 0.359 | 0.690 | 0.670 |
| 100 | 0.625 | 0.683 | 0.654 | 0.309 | 0.664 | 0.644 |
| 101 | 0.667 | 0.692 | 0.679 | 0.358 | 0.684 | 0.675 |
| 102 | 0.675 | 0.700 | 0.688 | 0.375 | 0.692 | 0.684 |
| 103 | 0.683 | 0.683 | 0.683 | 0.367 | 0.683 | 0.683 |
| 104 | 0.667 | 0.675 | 0.671 | 0.342 | 0.672 | 0.669 |
| 105 | 0.667 | 0.667 | 0.667 | 0.333 | 0.667 | 0.667 |
| 106 | 0.658 | 0.675 | 0.667 | 0.333 | 0.669 | 0.664 |
| 107 | 0.658 | 0.658 | 0.658 | 0.317 | 0.658 | 0.658 |
| 108 | 0.625 | 0.675 | 0.650 | 0.300 | 0.658 | 0.641 |
| 109 | 0.667 | 0.683 | 0.675 | 0.350 | 0.678 | 0.672 |
| 110 | 0.625 | 0.658 | 0.642 | 0.283 | 0.647 | 0.636 |
| 111 | 0.592 | 0.683 | 0.638 | 0.276 | 0.651 | 0.620 |
| 112 | 0.683 | 0.742 | 0.713 | 0.426 | 0.726 | 0.704 |
| 113 | 0.642 | 0.700 | 0.671 | 0.342 | 0.681 | 0.661 |
| 114 | 0.675 | 0.750 | 0.713 | 0.426 | 0.730 | 0.701 |
| 115 | 0.667 | 0.733 | 0.700 | 0.401 | 0.714 | 0.690 |
| 116 | 0.650 | 0.750 | 0.700 | 0.402 | 0.722 | 0.684 |
| 117 | 0.658 | 0.725 | 0.692 | 0.384 | 0.705 | 0.681 |
| 118 | 0.667 | 0.742 | 0.704 | 0.409 | 0.721 | 0.693 |
| 119 | 0.658 | 0.708 | 0.683 | 0.367 | 0.693 | 0.675 |
| 120 | 0.675 | 0.733 | 0.704 | 0.409 | 0.717 | 0.695 |
| 121 | 0.642 | 0.717 | 0.679 | 0.359 | 0.694 | 0.667 |
| 122 | 0.658 | 0.725 | 0.692 | 0.384 | 0.705 | 0.681 |

|     |       |       |       |       |       |       |
|-----|-------|-------|-------|-------|-------|-------|
| 123 | 0.667 | 0.750 | 0.708 | 0.418 | 0.727 | 0.696 |
| 124 | 0.675 | 0.717 | 0.696 | 0.392 | 0.704 | 0.689 |
| 125 | 0.675 | 0.733 | 0.704 | 0.409 | 0.717 | 0.695 |
| 126 | 0.692 | 0.708 | 0.700 | 0.400 | 0.703 | 0.697 |
| 127 | 0.675 | 0.742 | 0.708 | 0.418 | 0.723 | 0.698 |
| 128 | 0.633 | 0.750 | 0.692 | 0.386 | 0.717 | 0.673 |
| 129 | 0.675 | 0.733 | 0.704 | 0.409 | 0.717 | 0.695 |
| 130 | 0.642 | 0.733 | 0.688 | 0.377 | 0.706 | 0.672 |
| 131 | 0.758 | 0.750 | 0.754 | 0.508 | 0.752 | 0.755 |
| 132 | 0.742 | 0.742 | 0.742 | 0.483 | 0.742 | 0.742 |
| 133 | 0.717 | 0.733 | 0.725 | 0.450 | 0.729 | 0.723 |
| 134 | 0.733 | 0.725 | 0.729 | 0.458 | 0.727 | 0.730 |
| 135 | 0.725 | 0.717 | 0.721 | 0.442 | 0.719 | 0.722 |
| 136 | 0.717 | 0.750 | 0.733 | 0.467 | 0.741 | 0.729 |
| 137 | 0.767 | 0.708 | 0.738 | 0.476 | 0.724 | 0.745 |
| 138 | 0.758 | 0.733 | 0.746 | 0.492 | 0.740 | 0.749 |
| 139 | 0.733 | 0.742 | 0.738 | 0.475 | 0.739 | 0.736 |
| 140 | 0.733 | 0.700 | 0.717 | 0.434 | 0.710 | 0.721 |
| 141 | 0.758 | 0.758 | 0.758 | 0.517 | 0.758 | 0.758 |
| 142 | 0.767 | 0.700 | 0.733 | 0.468 | 0.719 | 0.742 |
| 143 | 0.733 | 0.708 | 0.721 | 0.442 | 0.715 | 0.724 |
| 144 | 0.758 | 0.692 | 0.725 | 0.451 | 0.711 | 0.734 |
| 145 | 0.750 | 0.700 | 0.725 | 0.451 | 0.714 | 0.732 |
| 146 | 0.758 | 0.725 | 0.742 | 0.484 | 0.734 | 0.746 |
| 147 | 0.750 | 0.733 | 0.742 | 0.483 | 0.738 | 0.744 |
| 148 | 0.717 | 0.733 | 0.725 | 0.450 | 0.729 | 0.723 |
| 149 | 0.733 | 0.700 | 0.717 | 0.434 | 0.710 | 0.721 |
| 150 | 0.742 | 0.733 | 0.738 | 0.475 | 0.736 | 0.739 |
| 151 | 0.742 | 0.717 | 0.729 | 0.458 | 0.724 | 0.733 |
| 152 | 0.758 | 0.708 | 0.733 | 0.467 | 0.722 | 0.740 |
| 153 | 0.733 | 0.700 | 0.717 | 0.434 | 0.710 | 0.721 |
| 154 | 0.767 | 0.675 | 0.721 | 0.444 | 0.702 | 0.733 |
| 155 | 0.725 | 0.725 | 0.725 | 0.450 | 0.725 | 0.725 |
| 156 | 0.750 | 0.675 | 0.713 | 0.426 | 0.698 | 0.723 |
| 157 | 0.742 | 0.717 | 0.729 | 0.458 | 0.724 | 0.733 |
| 158 | 0.750 | 0.725 | 0.738 | 0.475 | 0.732 | 0.741 |
| 159 | 0.750 | 0.700 | 0.725 | 0.451 | 0.714 | 0.732 |
| 160 | 0.758 | 0.708 | 0.733 | 0.467 | 0.722 | 0.740 |
| 161 | 0.725 | 0.725 | 0.725 | 0.450 | 0.725 | 0.725 |
| 162 | 0.733 | 0.725 | 0.729 | 0.458 | 0.727 | 0.730 |
| 163 | 0.750 | 0.725 | 0.738 | 0.475 | 0.732 | 0.741 |
| 164 | 0.733 | 0.733 | 0.733 | 0.467 | 0.733 | 0.733 |

|     |       |       |       |       |       |       |
|-----|-------|-------|-------|-------|-------|-------|
| 165 | 0.708 | 0.692 | 0.700 | 0.400 | 0.697 | 0.702 |
| 166 | 0.708 | 0.708 | 0.708 | 0.417 | 0.708 | 0.708 |
| 167 | 0.717 | 0.733 | 0.725 | 0.450 | 0.729 | 0.723 |
| 168 | 0.742 | 0.683 | 0.713 | 0.426 | 0.701 | 0.721 |
| 169 | 0.717 | 0.725 | 0.721 | 0.442 | 0.723 | 0.720 |
| 170 | 0.750 | 0.692 | 0.721 | 0.442 | 0.709 | 0.729 |
| 171 | 0.700 | 0.750 | 0.725 | 0.451 | 0.737 | 0.718 |
| 172 | 0.742 | 0.742 | 0.742 | 0.483 | 0.742 | 0.742 |
| 173 | 0.733 | 0.675 | 0.704 | 0.409 | 0.693 | 0.713 |
| 174 | 0.733 | 0.717 | 0.725 | 0.450 | 0.721 | 0.727 |
| 175 | 0.742 | 0.700 | 0.721 | 0.442 | 0.712 | 0.727 |
| 176 | 0.733 | 0.717 | 0.725 | 0.450 | 0.721 | 0.727 |
| 177 | 0.717 | 0.683 | 0.700 | 0.400 | 0.694 | 0.705 |
| 178 | 0.725 | 0.717 | 0.721 | 0.442 | 0.719 | 0.722 |
| 179 | 0.733 | 0.742 | 0.738 | 0.475 | 0.739 | 0.736 |
| 180 | 0.758 | 0.742 | 0.750 | 0.500 | 0.746 | 0.752 |
| 181 | 0.700 | 0.717 | 0.708 | 0.417 | 0.712 | 0.706 |
| 182 | 0.717 | 0.717 | 0.717 | 0.433 | 0.717 | 0.717 |
| 183 | 0.742 | 0.717 | 0.729 | 0.458 | 0.724 | 0.733 |
| 184 | 0.717 | 0.750 | 0.733 | 0.467 | 0.741 | 0.729 |
| 185 | 0.758 | 0.717 | 0.738 | 0.475 | 0.728 | 0.743 |
| 186 | 0.725 | 0.650 | 0.688 | 0.376 | 0.674 | 0.699 |
| 187 | 0.717 | 0.750 | 0.733 | 0.467 | 0.741 | 0.729 |
| 188 | 0.700 | 0.717 | 0.708 | 0.417 | 0.712 | 0.706 |
| 189 | 0.733 | 0.708 | 0.721 | 0.442 | 0.715 | 0.724 |
| 190 | 0.750 | 0.717 | 0.733 | 0.467 | 0.726 | 0.738 |
| 191 | 0.742 | 0.700 | 0.721 | 0.442 | 0.712 | 0.727 |
| 192 | 0.725 | 0.717 | 0.721 | 0.442 | 0.719 | 0.722 |
| 193 | 0.717 | 0.733 | 0.725 | 0.450 | 0.729 | 0.723 |
| 194 | 0.700 | 0.700 | 0.700 | 0.400 | 0.700 | 0.700 |
| 195 | 0.675 | 0.750 | 0.713 | 0.426 | 0.730 | 0.701 |
| 196 | 0.717 | 0.683 | 0.700 | 0.400 | 0.694 | 0.705 |
| 197 | 0.675 | 0.742 | 0.708 | 0.418 | 0.723 | 0.698 |
| 198 | 0.717 | 0.667 | 0.692 | 0.384 | 0.683 | 0.699 |
| 199 | 0.733 | 0.708 | 0.721 | 0.442 | 0.715 | 0.724 |
| 200 | 0.708 | 0.675 | 0.692 | 0.384 | 0.685 | 0.697 |
| 201 | 0.708 | 0.683 | 0.696 | 0.392 | 0.691 | 0.700 |
| 202 | 0.717 | 0.717 | 0.717 | 0.433 | 0.717 | 0.717 |
| 203 | 0.717 | 0.683 | 0.700 | 0.400 | 0.694 | 0.705 |
| 204 | 0.692 | 0.708 | 0.700 | 0.400 | 0.703 | 0.697 |
| 205 | 0.708 | 0.683 | 0.696 | 0.392 | 0.691 | 0.700 |
| 206 | 0.708 | 0.658 | 0.683 | 0.367 | 0.675 | 0.691 |

|     |       |       |       |       |       |       |
|-----|-------|-------|-------|-------|-------|-------|
| 207 | 0.708 | 0.742 | 0.725 | 0.450 | 0.733 | 0.720 |
| 208 | 0.675 | 0.725 | 0.700 | 0.401 | 0.711 | 0.692 |
| 209 | 0.708 | 0.733 | 0.721 | 0.442 | 0.726 | 0.717 |
| 210 | 0.675 | 0.683 | 0.679 | 0.358 | 0.681 | 0.678 |
| 211 | 0.708 | 0.700 | 0.704 | 0.408 | 0.702 | 0.705 |
| 212 | 0.733 | 0.717 | 0.725 | 0.450 | 0.721 | 0.727 |
| 213 | 0.667 | 0.675 | 0.671 | 0.342 | 0.672 | 0.669 |
| 214 | 0.683 | 0.708 | 0.696 | 0.392 | 0.701 | 0.692 |
| 215 | 0.717 | 0.658 | 0.688 | 0.376 | 0.677 | 0.696 |
| 216 | 0.700 | 0.708 | 0.704 | 0.408 | 0.706 | 0.703 |
| 217 | 0.667 | 0.700 | 0.683 | 0.367 | 0.690 | 0.678 |
| 218 | 0.717 | 0.675 | 0.696 | 0.392 | 0.688 | 0.702 |
| 219 | 0.642 | 0.733 | 0.688 | 0.377 | 0.706 | 0.672 |
| 220 | 0.717 | 0.692 | 0.704 | 0.408 | 0.699 | 0.708 |
| 221 | 0.700 | 0.758 | 0.729 | 0.459 | 0.743 | 0.721 |
| 222 | 0.708 | 0.742 | 0.725 | 0.450 | 0.733 | 0.720 |
| 223 | 0.717 | 0.700 | 0.708 | 0.417 | 0.705 | 0.711 |
| 224 | 0.683 | 0.742 | 0.713 | 0.426 | 0.726 | 0.704 |
| 225 | 0.700 | 0.708 | 0.704 | 0.408 | 0.706 | 0.703 |
| 226 | 0.658 | 0.725 | 0.692 | 0.384 | 0.705 | 0.681 |
| 227 | 0.750 | 0.733 | 0.742 | 0.483 | 0.738 | 0.744 |
| 228 | 0.700 | 0.658 | 0.679 | 0.359 | 0.672 | 0.686 |
| 229 | 0.733 | 0.725 | 0.729 | 0.458 | 0.727 | 0.730 |
| 230 | 0.675 | 0.700 | 0.688 | 0.375 | 0.692 | 0.684 |
| 231 | 0.733 | 0.683 | 0.708 | 0.417 | 0.698 | 0.715 |
| 232 | 0.750 | 0.675 | 0.713 | 0.426 | 0.698 | 0.723 |
| 233 | 0.675 | 0.742 | 0.708 | 0.418 | 0.723 | 0.698 |
| 234 | 0.725 | 0.708 | 0.717 | 0.433 | 0.713 | 0.719 |
| 235 | 0.725 | 0.717 | 0.721 | 0.442 | 0.719 | 0.722 |
| 236 | 0.692 | 0.717 | 0.704 | 0.408 | 0.709 | 0.700 |
| 237 | 0.700 | 0.725 | 0.713 | 0.425 | 0.718 | 0.709 |
| 238 | 0.708 | 0.700 | 0.704 | 0.408 | 0.702 | 0.705 |
| 239 | 0.683 | 0.733 | 0.708 | 0.417 | 0.719 | 0.701 |
| 240 | 0.708 | 0.708 | 0.708 | 0.417 | 0.708 | 0.708 |
| 241 | 0.708 | 0.717 | 0.713 | 0.425 | 0.714 | 0.711 |
| 242 | 0.725 | 0.692 | 0.708 | 0.417 | 0.702 | 0.713 |
| 243 | 0.708 | 0.758 | 0.733 | 0.467 | 0.746 | 0.726 |
| 244 | 0.675 | 0.708 | 0.692 | 0.384 | 0.698 | 0.686 |
| 245 | 0.708 | 0.708 | 0.708 | 0.417 | 0.708 | 0.708 |
| 246 | 0.717 | 0.742 | 0.729 | 0.458 | 0.735 | 0.726 |
| 247 | 0.700 | 0.708 | 0.704 | 0.408 | 0.706 | 0.703 |
| 248 | 0.733 | 0.708 | 0.721 | 0.442 | 0.715 | 0.724 |

|     |       |       |       |       |       |       |
|-----|-------|-------|-------|-------|-------|-------|
| 249 | 0.717 | 0.700 | 0.708 | 0.417 | 0.705 | 0.711 |
| 250 | 0.692 | 0.717 | 0.704 | 0.408 | 0.709 | 0.700 |
| 251 | 0.700 | 0.667 | 0.683 | 0.367 | 0.677 | 0.689 |
| 252 | 0.733 | 0.708 | 0.721 | 0.442 | 0.715 | 0.724 |
| 253 | 0.717 | 0.750 | 0.733 | 0.467 | 0.741 | 0.729 |
| 254 | 0.717 | 0.742 | 0.729 | 0.458 | 0.735 | 0.726 |
| 255 | 0.708 | 0.733 | 0.721 | 0.442 | 0.726 | 0.717 |
| 256 | 0.733 | 0.700 | 0.717 | 0.434 | 0.710 | 0.721 |
| 257 | 0.708 | 0.683 | 0.696 | 0.392 | 0.691 | 0.700 |
| 258 | 0.742 | 0.717 | 0.729 | 0.458 | 0.724 | 0.733 |
| 259 | 0.733 | 0.708 | 0.721 | 0.442 | 0.715 | 0.724 |
| 260 | 0.642 | 0.708 | 0.675 | 0.351 | 0.688 | 0.664 |
| 261 | 0.725 | 0.683 | 0.704 | 0.409 | 0.696 | 0.710 |
| 262 | 0.717 | 0.767 | 0.742 | 0.484 | 0.754 | 0.735 |
| 263 | 0.700 | 0.708 | 0.704 | 0.408 | 0.706 | 0.703 |
| 264 | 0.700 | 0.708 | 0.704 | 0.408 | 0.706 | 0.703 |
| 265 | 0.700 | 0.733 | 0.717 | 0.434 | 0.724 | 0.712 |
| 266 | 0.750 | 0.683 | 0.717 | 0.434 | 0.703 | 0.726 |
| 267 | 0.692 | 0.725 | 0.708 | 0.417 | 0.716 | 0.703 |
| 268 | 0.708 | 0.708 | 0.708 | 0.417 | 0.708 | 0.708 |
| 269 | 0.717 | 0.708 | 0.713 | 0.425 | 0.711 | 0.714 |
| 270 | 0.700 | 0.700 | 0.700 | 0.400 | 0.700 | 0.700 |
| 271 | 0.700 | 0.700 | 0.700 | 0.400 | 0.700 | 0.700 |
| 272 | 0.717 | 0.733 | 0.725 | 0.450 | 0.729 | 0.723 |
| 273 | 0.742 | 0.683 | 0.713 | 0.426 | 0.701 | 0.721 |
| 274 | 0.708 | 0.725 | 0.717 | 0.433 | 0.720 | 0.714 |
| 275 | 0.700 | 0.733 | 0.717 | 0.434 | 0.724 | 0.712 |
| 276 | 0.708 | 0.700 | 0.704 | 0.408 | 0.702 | 0.705 |
| 277 | 0.733 | 0.733 | 0.733 | 0.467 | 0.733 | 0.733 |
| 278 | 0.742 | 0.750 | 0.746 | 0.492 | 0.748 | 0.745 |
| 279 | 0.742 | 0.692 | 0.717 | 0.434 | 0.706 | 0.724 |
| 280 | 0.717 | 0.708 | 0.713 | 0.425 | 0.711 | 0.714 |
| 281 | 0.725 | 0.733 | 0.729 | 0.458 | 0.731 | 0.728 |
| 282 | 0.708 | 0.683 | 0.696 | 0.392 | 0.691 | 0.700 |
| 283 | 0.725 | 0.692 | 0.708 | 0.417 | 0.702 | 0.713 |
| 284 | 0.708 | 0.708 | 0.708 | 0.417 | 0.708 | 0.708 |
| 285 | 0.717 | 0.725 | 0.721 | 0.442 | 0.723 | 0.720 |
| 286 | 0.675 | 0.692 | 0.683 | 0.367 | 0.686 | 0.681 |
| 287 | 0.725 | 0.658 | 0.692 | 0.384 | 0.680 | 0.702 |
| 288 | 0.742 | 0.717 | 0.729 | 0.458 | 0.724 | 0.733 |
| 289 | 0.708 | 0.708 | 0.708 | 0.417 | 0.708 | 0.708 |
| 290 | 0.725 | 0.708 | 0.717 | 0.433 | 0.713 | 0.719 |

|     |       |       |       |       |       |       |
|-----|-------|-------|-------|-------|-------|-------|
| 291 | 0.725 | 0.708 | 0.717 | 0.433 | 0.713 | 0.719 |
| 292 | 0.725 | 0.683 | 0.704 | 0.409 | 0.696 | 0.710 |
| 293 | 0.692 | 0.700 | 0.696 | 0.392 | 0.697 | 0.695 |
| 294 | 0.667 | 0.725 | 0.696 | 0.392 | 0.708 | 0.687 |
| 295 | 0.717 | 0.717 | 0.717 | 0.433 | 0.717 | 0.717 |
| 296 | 0.733 | 0.708 | 0.721 | 0.442 | 0.715 | 0.724 |
| 297 | 0.725 | 0.708 | 0.717 | 0.433 | 0.713 | 0.719 |
| 298 | 0.725 | 0.708 | 0.717 | 0.433 | 0.713 | 0.719 |
| 299 | 0.725 | 0.700 | 0.713 | 0.425 | 0.707 | 0.716 |
| 300 | 0.717 | 0.683 | 0.700 | 0.400 | 0.694 | 0.705 |
| 301 | 0.683 | 0.717 | 0.700 | 0.400 | 0.707 | 0.695 |
| 302 | 0.725 | 0.683 | 0.704 | 0.409 | 0.696 | 0.710 |
| 303 | 0.675 | 0.708 | 0.692 | 0.384 | 0.698 | 0.686 |
| 304 | 0.692 | 0.692 | 0.692 | 0.383 | 0.692 | 0.692 |
| 305 | 0.658 | 0.708 | 0.683 | 0.367 | 0.693 | 0.675 |
| 306 | 0.742 | 0.658 | 0.700 | 0.401 | 0.685 | 0.712 |
| 307 | 0.733 | 0.700 | 0.717 | 0.434 | 0.710 | 0.721 |
| 308 | 0.717 | 0.692 | 0.704 | 0.408 | 0.699 | 0.708 |
| 309 | 0.750 | 0.692 | 0.721 | 0.442 | 0.709 | 0.729 |
| 310 | 0.717 | 0.700 | 0.708 | 0.417 | 0.705 | 0.711 |
| 311 | 0.742 | 0.692 | 0.717 | 0.434 | 0.706 | 0.724 |
| 312 | 0.683 | 0.717 | 0.700 | 0.400 | 0.707 | 0.695 |
| 313 | 0.742 | 0.700 | 0.721 | 0.442 | 0.712 | 0.727 |
| 314 | 0.717 | 0.733 | 0.725 | 0.450 | 0.729 | 0.723 |
| 315 | 0.700 | 0.692 | 0.696 | 0.392 | 0.694 | 0.697 |
| 316 | 0.717 | 0.683 | 0.700 | 0.400 | 0.694 | 0.705 |
| 317 | 0.733 | 0.742 | 0.738 | 0.475 | 0.739 | 0.736 |
| 318 | 0.708 | 0.733 | 0.721 | 0.442 | 0.726 | 0.717 |
| 319 | 0.725 | 0.692 | 0.708 | 0.417 | 0.702 | 0.713 |
| 320 | 0.708 | 0.683 | 0.696 | 0.392 | 0.691 | 0.700 |
| 321 | 0.717 | 0.683 | 0.700 | 0.400 | 0.694 | 0.705 |
| 322 | 0.683 | 0.683 | 0.683 | 0.367 | 0.683 | 0.683 |
| 323 | 0.700 | 0.708 | 0.704 | 0.408 | 0.706 | 0.703 |
| 324 | 0.733 | 0.675 | 0.704 | 0.409 | 0.693 | 0.713 |
| 325 | 0.667 | 0.692 | 0.679 | 0.358 | 0.684 | 0.675 |
| 326 | 0.717 | 0.717 | 0.717 | 0.433 | 0.717 | 0.717 |
| 327 | 0.725 | 0.692 | 0.708 | 0.417 | 0.702 | 0.713 |
| 328 | 0.717 | 0.725 | 0.721 | 0.442 | 0.723 | 0.720 |
| 329 | 0.725 | 0.708 | 0.717 | 0.433 | 0.713 | 0.719 |
| 330 | 0.708 | 0.708 | 0.708 | 0.417 | 0.708 | 0.708 |
| 331 | 0.717 | 0.725 | 0.721 | 0.442 | 0.723 | 0.720 |
| 332 | 0.717 | 0.700 | 0.708 | 0.417 | 0.705 | 0.711 |



|     |       |       |       |       |       |       |
|-----|-------|-------|-------|-------|-------|-------|
| 333 | 0.717 | 0.700 | 0.708 | 0.417 | 0.705 | 0.711 |
| 334 | 0.725 | 0.708 | 0.717 | 0.433 | 0.713 | 0.719 |
| 335 | 0.733 | 0.692 | 0.713 | 0.425 | 0.704 | 0.718 |
| 336 | 0.700 | 0.675 | 0.688 | 0.375 | 0.683 | 0.691 |
| 337 | 0.692 | 0.675 | 0.683 | 0.367 | 0.680 | 0.686 |
| 338 | 0.717 | 0.675 | 0.696 | 0.392 | 0.688 | 0.702 |
| 339 | 0.667 | 0.717 | 0.692 | 0.384 | 0.702 | 0.684 |
| 340 | 0.700 | 0.708 | 0.704 | 0.408 | 0.706 | 0.703 |
| 341 | 0.733 | 0.708 | 0.721 | 0.442 | 0.715 | 0.724 |
| 342 | 0.692 | 0.692 | 0.692 | 0.383 | 0.692 | 0.692 |
| 343 | 0.717 | 0.683 | 0.700 | 0.400 | 0.694 | 0.705 |
| 344 | 0.667 | 0.675 | 0.671 | 0.342 | 0.672 | 0.669 |
| 345 | 0.708 | 0.692 | 0.700 | 0.400 | 0.697 | 0.702 |
| 346 | 0.742 | 0.700 | 0.721 | 0.442 | 0.712 | 0.727 |
| 347 | 0.675 | 0.692 | 0.683 | 0.367 | 0.686 | 0.681 |
| 348 | 0.683 | 0.700 | 0.692 | 0.383 | 0.695 | 0.689 |
| 349 | 0.708 | 0.717 | 0.713 | 0.425 | 0.714 | 0.711 |
| 350 | 0.700 | 0.642 | 0.671 | 0.342 | 0.661 | 0.680 |
| 351 | 0.667 | 0.683 | 0.675 | 0.350 | 0.678 | 0.672 |
| 352 | 0.675 | 0.733 | 0.704 | 0.409 | 0.717 | 0.695 |
| 353 | 0.725 | 0.683 | 0.704 | 0.409 | 0.696 | 0.710 |
| 354 | 0.717 | 0.658 | 0.688 | 0.376 | 0.677 | 0.696 |
| 355 | 0.717 | 0.667 | 0.692 | 0.384 | 0.683 | 0.699 |
| 356 | 0.708 | 0.700 | 0.704 | 0.408 | 0.702 | 0.705 |
| 357 | 0.708 | 0.658 | 0.683 | 0.367 | 0.675 | 0.691 |
| 358 | 0.733 | 0.650 | 0.692 | 0.385 | 0.677 | 0.704 |
| 359 | 0.742 | 0.658 | 0.700 | 0.401 | 0.685 | 0.712 |
| 360 | 0.725 | 0.650 | 0.688 | 0.376 | 0.674 | 0.699 |
| 361 | 0.733 | 0.700 | 0.717 | 0.434 | 0.710 | 0.721 |
| 362 | 0.700 | 0.675 | 0.688 | 0.375 | 0.683 | 0.691 |
| 363 | 0.717 | 0.675 | 0.696 | 0.392 | 0.688 | 0.702 |
| 364 | 0.708 | 0.675 | 0.692 | 0.384 | 0.685 | 0.697 |
| 365 | 0.725 | 0.692 | 0.708 | 0.417 | 0.702 | 0.713 |
| 366 | 0.692 | 0.675 | 0.683 | 0.367 | 0.680 | 0.686 |
| 367 | 0.700 | 0.675 | 0.688 | 0.375 | 0.683 | 0.691 |
| 368 | 0.733 | 0.667 | 0.700 | 0.401 | 0.688 | 0.710 |
| 369 | 0.725 | 0.692 | 0.708 | 0.417 | 0.702 | 0.713 |
| 370 | 0.725 | 0.700 | 0.713 | 0.425 | 0.707 | 0.716 |
| 371 | 0.708 | 0.650 | 0.679 | 0.359 | 0.669 | 0.688 |
| 372 | 0.708 | 0.650 | 0.679 | 0.359 | 0.669 | 0.688 |
| 373 | 0.700 | 0.692 | 0.696 | 0.392 | 0.694 | 0.697 |
| 374 | 0.708 | 0.642 | 0.675 | 0.351 | 0.664 | 0.685 |

|     |       |       |       |       |       |       |
|-----|-------|-------|-------|-------|-------|-------|
| 375 | 0.725 | 0.650 | 0.688 | 0.376 | 0.674 | 0.699 |
| 376 | 0.750 | 0.667 | 0.708 | 0.418 | 0.692 | 0.720 |
| 377 | 0.708 | 0.683 | 0.696 | 0.392 | 0.691 | 0.700 |
| 378 | 0.717 | 0.667 | 0.692 | 0.384 | 0.683 | 0.699 |
| 379 | 0.725 | 0.658 | 0.692 | 0.384 | 0.680 | 0.702 |
| 380 | 0.733 | 0.642 | 0.688 | 0.377 | 0.672 | 0.701 |
| 381 | 0.692 | 0.725 | 0.708 | 0.417 | 0.716 | 0.703 |
| 382 | 0.717 | 0.717 | 0.717 | 0.433 | 0.717 | 0.717 |
| 383 | 0.725 | 0.650 | 0.688 | 0.376 | 0.674 | 0.699 |
| 384 | 0.692 | 0.700 | 0.696 | 0.392 | 0.697 | 0.695 |
| 385 | 0.750 | 0.717 | 0.733 | 0.467 | 0.726 | 0.738 |
| 386 | 0.742 | 0.658 | 0.700 | 0.401 | 0.685 | 0.712 |
| 387 | 0.725 | 0.692 | 0.708 | 0.417 | 0.702 | 0.713 |
| 388 | 0.742 | 0.692 | 0.717 | 0.434 | 0.706 | 0.724 |
| 389 | 0.692 | 0.667 | 0.679 | 0.358 | 0.675 | 0.683 |
| 390 | 0.658 | 0.667 | 0.663 | 0.325 | 0.664 | 0.661 |
| 391 | 0.667 | 0.708 | 0.688 | 0.375 | 0.696 | 0.681 |
| 392 | 0.742 | 0.658 | 0.700 | 0.401 | 0.685 | 0.712 |
| 393 | 0.667 | 0.717 | 0.692 | 0.384 | 0.702 | 0.684 |
| 394 | 0.675 | 0.633 | 0.654 | 0.309 | 0.648 | 0.661 |
| 395 | 0.742 | 0.675 | 0.708 | 0.418 | 0.695 | 0.718 |
| 396 | 0.708 | 0.658 | 0.683 | 0.367 | 0.675 | 0.691 |
| 397 | 0.700 | 0.658 | 0.679 | 0.359 | 0.672 | 0.686 |
| 398 | 0.692 | 0.675 | 0.683 | 0.367 | 0.680 | 0.686 |
| 399 | 0.733 | 0.717 | 0.725 | 0.450 | 0.721 | 0.727 |
| 400 | 0.675 | 0.692 | 0.683 | 0.367 | 0.686 | 0.681 |
| 401 | 0.725 | 0.683 | 0.704 | 0.409 | 0.696 | 0.710 |
| 402 | 0.717 | 0.692 | 0.704 | 0.408 | 0.699 | 0.708 |
| 403 | 0.717 | 0.683 | 0.700 | 0.400 | 0.694 | 0.705 |
| 404 | 0.658 | 0.717 | 0.688 | 0.376 | 0.699 | 0.678 |
| 405 | 0.692 | 0.633 | 0.663 | 0.326 | 0.654 | 0.672 |
| 406 | 0.683 | 0.692 | 0.688 | 0.375 | 0.689 | 0.686 |
| 407 | 0.692 | 0.658 | 0.675 | 0.350 | 0.669 | 0.680 |
| 408 | 0.708 | 0.667 | 0.688 | 0.375 | 0.680 | 0.694 |
| 409 | 0.683 | 0.650 | 0.667 | 0.334 | 0.661 | 0.672 |
| 410 | 0.675 | 0.692 | 0.683 | 0.367 | 0.686 | 0.681 |
| 411 | 0.650 | 0.675 | 0.663 | 0.325 | 0.667 | 0.658 |
| 412 | 0.717 | 0.692 | 0.704 | 0.408 | 0.699 | 0.708 |
| 413 | 0.675 | 0.700 | 0.688 | 0.375 | 0.692 | 0.684 |
| 414 | 0.725 | 0.667 | 0.696 | 0.392 | 0.685 | 0.704 |
| 415 | 0.675 | 0.692 | 0.683 | 0.367 | 0.686 | 0.681 |
| 416 | 0.708 | 0.625 | 0.667 | 0.334 | 0.654 | 0.680 |

|     |       |       |       |       |       |       |
|-----|-------|-------|-------|-------|-------|-------|
| 417 | 0.708 | 0.667 | 0.688 | 0.375 | 0.680 | 0.694 |
| 418 | 0.708 | 0.683 | 0.696 | 0.392 | 0.691 | 0.700 |
| 419 | 0.700 | 0.667 | 0.683 | 0.367 | 0.677 | 0.689 |
| 420 | 0.717 | 0.675 | 0.696 | 0.392 | 0.688 | 0.702 |
| 421 | 0.700 | 0.692 | 0.696 | 0.392 | 0.694 | 0.697 |
| 422 | 0.683 | 0.650 | 0.667 | 0.334 | 0.661 | 0.672 |
| 423 | 0.700 | 0.658 | 0.679 | 0.359 | 0.672 | 0.686 |
| 424 | 0.700 | 0.683 | 0.692 | 0.383 | 0.689 | 0.694 |
| 425 | 0.675 | 0.683 | 0.679 | 0.358 | 0.681 | 0.678 |
| 426 | 0.692 | 0.658 | 0.675 | 0.350 | 0.669 | 0.680 |
| 427 | 0.717 | 0.683 | 0.700 | 0.400 | 0.694 | 0.705 |
| 428 | 0.700 | 0.692 | 0.696 | 0.392 | 0.694 | 0.697 |
| 429 | 0.708 | 0.658 | 0.683 | 0.367 | 0.675 | 0.691 |
| 430 | 0.717 | 0.683 | 0.700 | 0.400 | 0.694 | 0.705 |
| 431 | 0.658 | 0.667 | 0.663 | 0.325 | 0.664 | 0.661 |
| 432 | 0.700 | 0.667 | 0.683 | 0.367 | 0.677 | 0.689 |
| 433 | 0.692 | 0.692 | 0.692 | 0.383 | 0.692 | 0.692 |
| 434 | 0.692 | 0.675 | 0.683 | 0.367 | 0.680 | 0.686 |
| 435 | 0.692 | 0.675 | 0.683 | 0.367 | 0.680 | 0.686 |
| 436 | 0.717 | 0.675 | 0.696 | 0.392 | 0.688 | 0.702 |
| 437 | 0.692 | 0.692 | 0.692 | 0.383 | 0.692 | 0.692 |
| 438 | 0.683 | 0.658 | 0.671 | 0.342 | 0.667 | 0.675 |
| 439 | 0.700 | 0.700 | 0.700 | 0.400 | 0.700 | 0.700 |
| 440 | 0.683 | 0.650 | 0.667 | 0.334 | 0.661 | 0.672 |
| 441 | 0.700 | 0.650 | 0.675 | 0.350 | 0.667 | 0.683 |
| 442 | 0.717 | 0.633 | 0.675 | 0.351 | 0.662 | 0.688 |
| 443 | 0.692 | 0.625 | 0.658 | 0.317 | 0.648 | 0.669 |
| 444 | 0.650 | 0.700 | 0.675 | 0.350 | 0.684 | 0.667 |
| 445 | 0.642 | 0.675 | 0.658 | 0.317 | 0.664 | 0.653 |
| 446 | 0.675 | 0.642 | 0.658 | 0.317 | 0.653 | 0.664 |
| 447 | 0.683 | 0.667 | 0.675 | 0.350 | 0.672 | 0.678 |
| 448 | 0.675 | 0.700 | 0.688 | 0.375 | 0.692 | 0.684 |
| 449 | 0.667 | 0.675 | 0.671 | 0.342 | 0.672 | 0.669 |
| 450 | 0.692 | 0.650 | 0.671 | 0.342 | 0.664 | 0.678 |
| 451 | 0.658 | 0.667 | 0.663 | 0.325 | 0.664 | 0.661 |
| 452 | 0.717 | 0.633 | 0.675 | 0.351 | 0.662 | 0.688 |
| 453 | 0.675 | 0.683 | 0.679 | 0.358 | 0.681 | 0.678 |
| 454 | 0.683 | 0.692 | 0.688 | 0.375 | 0.689 | 0.686 |
| 455 | 0.708 | 0.683 | 0.696 | 0.392 | 0.691 | 0.700 |
| 456 | 0.692 | 0.650 | 0.671 | 0.342 | 0.664 | 0.678 |
| 457 | 0.683 | 0.642 | 0.663 | 0.325 | 0.656 | 0.669 |
| 458 | 0.717 | 0.683 | 0.700 | 0.400 | 0.694 | 0.705 |

|     |       |       |       |       |       |       |
|-----|-------|-------|-------|-------|-------|-------|
| 459 | 0.708 | 0.675 | 0.692 | 0.384 | 0.685 | 0.697 |
| 460 | 0.667 | 0.675 | 0.671 | 0.342 | 0.672 | 0.669 |
| 461 | 0.725 | 0.675 | 0.700 | 0.401 | 0.690 | 0.707 |
| 462 | 0.658 | 0.700 | 0.679 | 0.359 | 0.687 | 0.672 |
| 463 | 0.725 | 0.667 | 0.696 | 0.392 | 0.685 | 0.704 |
| 464 | 0.692 | 0.683 | 0.688 | 0.375 | 0.686 | 0.689 |
| 465 | 0.692 | 0.683 | 0.688 | 0.375 | 0.686 | 0.689 |
| 466 | 0.692 | 0.667 | 0.679 | 0.358 | 0.675 | 0.683 |
| 467 | 0.692 | 0.675 | 0.683 | 0.367 | 0.680 | 0.686 |
| 468 | 0.683 | 0.683 | 0.683 | 0.367 | 0.683 | 0.683 |
| 469 | 0.692 | 0.658 | 0.675 | 0.350 | 0.669 | 0.680 |
| 470 | 0.692 | 0.667 | 0.679 | 0.358 | 0.675 | 0.683 |
| 471 | 0.650 | 0.700 | 0.675 | 0.350 | 0.684 | 0.667 |
| 472 | 0.667 | 0.675 | 0.671 | 0.342 | 0.672 | 0.669 |
| 473 | 0.667 | 0.667 | 0.667 | 0.333 | 0.667 | 0.667 |
| 474 | 0.683 | 0.650 | 0.667 | 0.334 | 0.661 | 0.672 |
| 475 | 0.692 | 0.650 | 0.671 | 0.342 | 0.664 | 0.678 |
| 476 | 0.717 | 0.658 | 0.688 | 0.376 | 0.677 | 0.696 |
| 477 | 0.683 | 0.658 | 0.671 | 0.342 | 0.667 | 0.675 |
| 478 | 0.675 | 0.667 | 0.671 | 0.342 | 0.669 | 0.672 |
| 479 | 0.692 | 0.683 | 0.688 | 0.375 | 0.686 | 0.689 |
| 480 | 0.708 | 0.692 | 0.700 | 0.400 | 0.697 | 0.702 |
| 481 | 0.683 | 0.658 | 0.671 | 0.342 | 0.667 | 0.675 |
| 482 | 0.700 | 0.658 | 0.679 | 0.359 | 0.672 | 0.686 |
| 483 | 0.708 | 0.650 | 0.679 | 0.359 | 0.669 | 0.688 |
| 484 | 0.642 | 0.642 | 0.642 | 0.283 | 0.642 | 0.642 |
| 485 | 0.683 | 0.675 | 0.679 | 0.358 | 0.678 | 0.680 |
| 486 | 0.667 | 0.667 | 0.667 | 0.333 | 0.667 | 0.667 |
| 487 | 0.658 | 0.683 | 0.671 | 0.342 | 0.675 | 0.667 |
| 488 | 0.717 | 0.650 | 0.683 | 0.367 | 0.672 | 0.694 |
| 489 | 0.708 | 0.675 | 0.692 | 0.384 | 0.685 | 0.697 |
| 490 | 0.692 | 0.675 | 0.683 | 0.367 | 0.680 | 0.686 |
| 491 | 0.608 | 0.658 | 0.633 | 0.267 | 0.640 | 0.624 |
| 492 | 0.692 | 0.667 | 0.679 | 0.358 | 0.675 | 0.683 |
| 493 | 0.675 | 0.692 | 0.683 | 0.367 | 0.686 | 0.681 |
| 494 | 0.683 | 0.667 | 0.675 | 0.350 | 0.672 | 0.678 |
| 495 | 0.733 | 0.658 | 0.696 | 0.393 | 0.682 | 0.707 |
| 496 | 0.700 | 0.675 | 0.688 | 0.375 | 0.683 | 0.691 |
| 497 | 0.675 | 0.675 | 0.675 | 0.350 | 0.675 | 0.675 |
| 498 | 0.667 | 0.658 | 0.663 | 0.325 | 0.661 | 0.664 |
| 499 | 0.667 | 0.667 | 0.667 | 0.333 | 0.667 | 0.667 |
| 500 | 0.700 | 0.658 | 0.679 | 0.359 | 0.672 | 0.686 |

|     |       |       |       |       |       |       |
|-----|-------|-------|-------|-------|-------|-------|
| 501 | 0.700 | 0.658 | 0.679 | 0.359 | 0.672 | 0.686 |
| 502 | 0.700 | 0.675 | 0.688 | 0.375 | 0.683 | 0.691 |
| 503 | 0.692 | 0.658 | 0.675 | 0.350 | 0.669 | 0.680 |
| 504 | 0.708 | 0.617 | 0.663 | 0.326 | 0.649 | 0.677 |
| 505 | 0.708 | 0.683 | 0.696 | 0.392 | 0.691 | 0.700 |
| 506 | 0.725 | 0.700 | 0.713 | 0.425 | 0.707 | 0.716 |
| 507 | 0.667 | 0.642 | 0.654 | 0.308 | 0.650 | 0.658 |
| 508 | 0.692 | 0.583 | 0.638 | 0.277 | 0.624 | 0.656 |
| 509 | 0.675 | 0.658 | 0.667 | 0.333 | 0.664 | 0.669 |
| 510 | 0.683 | 0.692 | 0.688 | 0.375 | 0.689 | 0.686 |
| 511 | 0.667 | 0.667 | 0.667 | 0.333 | 0.667 | 0.667 |
| 512 | 0.708 | 0.650 | 0.679 | 0.359 | 0.669 | 0.688 |
| 513 | 0.700 | 0.675 | 0.688 | 0.375 | 0.683 | 0.691 |
| 514 | 0.658 | 0.650 | 0.654 | 0.308 | 0.653 | 0.656 |
| 515 | 0.692 | 0.658 | 0.675 | 0.350 | 0.669 | 0.680 |
| 516 | 0.625 | 0.692 | 0.658 | 0.317 | 0.670 | 0.647 |
| 517 | 0.675 | 0.625 | 0.650 | 0.300 | 0.643 | 0.659 |
| 518 | 0.650 | 0.667 | 0.658 | 0.317 | 0.661 | 0.655 |
| 519 | 0.708 | 0.683 | 0.696 | 0.392 | 0.691 | 0.700 |
| 520 | 0.667 | 0.667 | 0.667 | 0.333 | 0.667 | 0.667 |
| 521 | 0.708 | 0.708 | 0.708 | 0.417 | 0.708 | 0.708 |
| 522 | 0.658 | 0.650 | 0.654 | 0.308 | 0.653 | 0.656 |
| 523 | 0.675 | 0.658 | 0.667 | 0.333 | 0.664 | 0.669 |
| 524 | 0.675 | 0.617 | 0.646 | 0.292 | 0.638 | 0.656 |
| 525 | 0.700 | 0.625 | 0.663 | 0.326 | 0.651 | 0.675 |
| 526 | 0.700 | 0.642 | 0.671 | 0.342 | 0.661 | 0.680 |
| 527 | 0.650 | 0.675 | 0.663 | 0.325 | 0.667 | 0.658 |
| 528 | 0.708 | 0.658 | 0.683 | 0.367 | 0.675 | 0.691 |
| 529 | 0.692 | 0.700 | 0.696 | 0.392 | 0.697 | 0.695 |
| 530 | 0.700 | 0.658 | 0.679 | 0.359 | 0.672 | 0.686 |
| 531 | 0.658 | 0.658 | 0.658 | 0.317 | 0.658 | 0.658 |
| 532 | 0.717 | 0.667 | 0.692 | 0.384 | 0.683 | 0.699 |
| 533 | 0.667 | 0.675 | 0.671 | 0.342 | 0.672 | 0.669 |
| 534 | 0.683 | 0.658 | 0.671 | 0.342 | 0.667 | 0.675 |
| 535 | 0.708 | 0.658 | 0.683 | 0.367 | 0.675 | 0.691 |
| 536 | 0.667 | 0.683 | 0.675 | 0.350 | 0.678 | 0.672 |
| 537 | 0.717 | 0.667 | 0.692 | 0.384 | 0.683 | 0.699 |
| 538 | 0.625 | 0.667 | 0.646 | 0.292 | 0.652 | 0.638 |
| 539 | 0.725 | 0.650 | 0.688 | 0.376 | 0.674 | 0.699 |
| 540 | 0.700 | 0.675 | 0.688 | 0.375 | 0.683 | 0.691 |
| 541 | 0.700 | 0.658 | 0.679 | 0.359 | 0.672 | 0.686 |
| 542 | 0.683 | 0.675 | 0.679 | 0.358 | 0.678 | 0.680 |

|     |       |       |       |       |       |       |
|-----|-------|-------|-------|-------|-------|-------|
| 543 | 0.700 | 0.650 | 0.675 | 0.350 | 0.667 | 0.683 |
| 544 | 0.675 | 0.675 | 0.675 | 0.350 | 0.675 | 0.675 |
| 545 | 0.667 | 0.675 | 0.671 | 0.342 | 0.672 | 0.669 |
| 546 | 0.700 | 0.650 | 0.675 | 0.350 | 0.667 | 0.683 |
| 547 | 0.658 | 0.692 | 0.675 | 0.350 | 0.681 | 0.669 |
| 548 | 0.642 | 0.625 | 0.633 | 0.267 | 0.631 | 0.636 |
| 549 | 0.708 | 0.642 | 0.675 | 0.351 | 0.664 | 0.685 |
| 550 | 0.667 | 0.667 | 0.667 | 0.333 | 0.667 | 0.667 |
| 551 | 0.708 | 0.650 | 0.679 | 0.359 | 0.669 | 0.688 |
| 552 | 0.692 | 0.650 | 0.671 | 0.342 | 0.664 | 0.678 |
| 553 | 0.692 | 0.650 | 0.671 | 0.342 | 0.664 | 0.678 |
| 554 | 0.650 | 0.650 | 0.650 | 0.300 | 0.650 | 0.650 |
| 555 | 0.692 | 0.675 | 0.683 | 0.367 | 0.680 | 0.686 |
| 556 | 0.700 | 0.658 | 0.679 | 0.359 | 0.672 | 0.686 |
| 557 | 0.675 | 0.642 | 0.658 | 0.317 | 0.653 | 0.664 |
| 558 | 0.658 | 0.683 | 0.671 | 0.342 | 0.675 | 0.667 |
| 559 | 0.683 | 0.675 | 0.679 | 0.358 | 0.678 | 0.680 |
| 560 | 0.700 | 0.633 | 0.667 | 0.334 | 0.656 | 0.677 |
| 561 | 0.675 | 0.633 | 0.654 | 0.309 | 0.648 | 0.661 |
| 562 | 0.658 | 0.625 | 0.642 | 0.283 | 0.637 | 0.648 |
| 563 | 0.667 | 0.633 | 0.650 | 0.300 | 0.645 | 0.656 |
| 564 | 0.683 | 0.650 | 0.667 | 0.334 | 0.661 | 0.672 |
| 565 | 0.675 | 0.700 | 0.688 | 0.375 | 0.692 | 0.684 |
| 566 | 0.717 | 0.650 | 0.683 | 0.367 | 0.672 | 0.694 |
| 567 | 0.658 | 0.650 | 0.654 | 0.308 | 0.653 | 0.656 |
| 568 | 0.708 | 0.642 | 0.675 | 0.351 | 0.664 | 0.685 |
| 569 | 0.733 | 0.625 | 0.679 | 0.360 | 0.662 | 0.696 |
| 570 | 0.692 | 0.642 | 0.667 | 0.334 | 0.659 | 0.675 |
| 571 | 0.700 | 0.642 | 0.671 | 0.342 | 0.661 | 0.680 |
| 572 | 0.700 | 0.683 | 0.692 | 0.383 | 0.689 | 0.694 |
| 573 | 0.675 | 0.633 | 0.654 | 0.309 | 0.648 | 0.661 |
| 574 | 0.683 | 0.667 | 0.675 | 0.350 | 0.672 | 0.678 |
| 575 | 0.733 | 0.633 | 0.683 | 0.369 | 0.667 | 0.698 |
| 576 | 0.675 | 0.608 | 0.642 | 0.284 | 0.633 | 0.653 |
| 577 | 0.642 | 0.617 | 0.629 | 0.258 | 0.626 | 0.634 |
| 578 | 0.725 | 0.667 | 0.696 | 0.392 | 0.685 | 0.704 |
| 579 | 0.667 | 0.633 | 0.650 | 0.300 | 0.645 | 0.656 |
| 580 | 0.708 | 0.683 | 0.696 | 0.392 | 0.691 | 0.700 |
| 581 | 0.700 | 0.633 | 0.667 | 0.334 | 0.656 | 0.677 |
| 582 | 0.683 | 0.617 | 0.650 | 0.301 | 0.641 | 0.661 |
| 583 | 0.700 | 0.642 | 0.671 | 0.342 | 0.661 | 0.680 |
| 584 | 0.700 | 0.650 | 0.675 | 0.350 | 0.667 | 0.683 |

|     |       |       |       |       |       |       |
|-----|-------|-------|-------|-------|-------|-------|
| 585 | 0.717 | 0.683 | 0.700 | 0.400 | 0.694 | 0.705 |
| 586 | 0.692 | 0.650 | 0.671 | 0.342 | 0.664 | 0.678 |
| 587 | 0.658 | 0.667 | 0.663 | 0.325 | 0.664 | 0.661 |
| 588 | 0.717 | 0.642 | 0.679 | 0.359 | 0.667 | 0.691 |
| 589 | 0.667 | 0.658 | 0.663 | 0.325 | 0.661 | 0.664 |
| 590 | 0.650 | 0.675 | 0.663 | 0.325 | 0.667 | 0.658 |
| 591 | 0.650 | 0.667 | 0.658 | 0.317 | 0.661 | 0.655 |
| 592 | 0.683 | 0.625 | 0.654 | 0.309 | 0.646 | 0.664 |
| 593 | 0.708 | 0.675 | 0.692 | 0.384 | 0.685 | 0.697 |
| 594 | 0.633 | 0.658 | 0.646 | 0.292 | 0.650 | 0.641 |
| 595 | 0.692 | 0.633 | 0.663 | 0.326 | 0.654 | 0.672 |
| 596 | 0.692 | 0.650 | 0.671 | 0.342 | 0.664 | 0.678 |
| 597 | 0.675 | 0.642 | 0.658 | 0.317 | 0.653 | 0.664 |
| 598 | 0.675 | 0.650 | 0.663 | 0.325 | 0.659 | 0.667 |
| 599 | 0.700 | 0.625 | 0.663 | 0.326 | 0.651 | 0.675 |
| 600 | 0.675 | 0.675 | 0.675 | 0.350 | 0.675 | 0.675 |
| 601 | 0.658 | 0.658 | 0.658 | 0.317 | 0.658 | 0.658 |
| 602 | 0.642 | 0.633 | 0.638 | 0.275 | 0.636 | 0.639 |
| 603 | 0.650 | 0.683 | 0.667 | 0.334 | 0.672 | 0.661 |
| 604 | 0.683 | 0.650 | 0.667 | 0.334 | 0.661 | 0.672 |
| 605 | 0.667 | 0.633 | 0.650 | 0.300 | 0.645 | 0.656 |
| 606 | 0.650 | 0.650 | 0.650 | 0.300 | 0.650 | 0.650 |
| 607 | 0.667 | 0.683 | 0.675 | 0.350 | 0.678 | 0.672 |
| 608 | 0.692 | 0.683 | 0.688 | 0.375 | 0.686 | 0.689 |
| 609 | 0.675 | 0.600 | 0.638 | 0.276 | 0.628 | 0.651 |
| 610 | 0.658 | 0.650 | 0.654 | 0.308 | 0.653 | 0.656 |
| 611 | 0.692 | 0.675 | 0.683 | 0.367 | 0.680 | 0.686 |
| 612 | 0.692 | 0.683 | 0.688 | 0.375 | 0.686 | 0.689 |
| 613 | 0.717 | 0.675 | 0.696 | 0.392 | 0.688 | 0.702 |
| 614 | 0.675 | 0.667 | 0.671 | 0.342 | 0.669 | 0.672 |
| 615 | 0.683 | 0.608 | 0.646 | 0.292 | 0.636 | 0.659 |
| 616 | 0.675 | 0.625 | 0.650 | 0.300 | 0.643 | 0.659 |
| 617 | 0.683 | 0.650 | 0.667 | 0.334 | 0.661 | 0.672 |
| 618 | 0.692 | 0.642 | 0.667 | 0.334 | 0.659 | 0.675 |
| 619 | 0.667 | 0.642 | 0.654 | 0.308 | 0.650 | 0.658 |
| 620 | 0.667 | 0.600 | 0.633 | 0.267 | 0.625 | 0.645 |
| 621 | 0.692 | 0.667 | 0.679 | 0.358 | 0.675 | 0.683 |
| 622 | 0.700 | 0.658 | 0.679 | 0.359 | 0.672 | 0.686 |
| 623 | 0.692 | 0.667 | 0.679 | 0.358 | 0.675 | 0.683 |
| 624 | 0.683 | 0.667 | 0.675 | 0.350 | 0.672 | 0.678 |
| 625 | 0.658 | 0.642 | 0.650 | 0.300 | 0.648 | 0.653 |
| 626 | 0.717 | 0.625 | 0.671 | 0.343 | 0.656 | 0.685 |

|     |       |       |       |       |       |       |
|-----|-------|-------|-------|-------|-------|-------|
| 627 | 0.625 | 0.683 | 0.654 | 0.309 | 0.664 | 0.644 |
| 628 | 0.658 | 0.642 | 0.650 | 0.300 | 0.648 | 0.653 |
| 629 | 0.700 | 0.625 | 0.663 | 0.326 | 0.651 | 0.675 |
| 630 | 0.692 | 0.667 | 0.679 | 0.358 | 0.675 | 0.683 |
| 631 | 0.708 | 0.650 | 0.679 | 0.359 | 0.669 | 0.688 |
| 632 | 0.700 | 0.683 | 0.692 | 0.383 | 0.689 | 0.694 |
| 633 | 0.692 | 0.683 | 0.688 | 0.375 | 0.686 | 0.689 |
| 634 | 0.700 | 0.633 | 0.667 | 0.334 | 0.656 | 0.677 |
| 635 | 0.650 | 0.633 | 0.642 | 0.283 | 0.639 | 0.645 |
| 636 | 0.667 | 0.642 | 0.654 | 0.308 | 0.650 | 0.658 |
| 637 | 0.708 | 0.625 | 0.667 | 0.334 | 0.654 | 0.680 |
| 638 | 0.700 | 0.625 | 0.663 | 0.326 | 0.651 | 0.675 |
| 639 | 0.692 | 0.608 | 0.650 | 0.301 | 0.638 | 0.664 |
| 640 | 0.692 | 0.683 | 0.688 | 0.375 | 0.686 | 0.689 |
| 641 | 0.667 | 0.667 | 0.667 | 0.333 | 0.667 | 0.667 |
| 642 | 0.700 | 0.667 | 0.683 | 0.367 | 0.677 | 0.689 |
| 643 | 0.658 | 0.642 | 0.650 | 0.300 | 0.648 | 0.653 |
| 644 | 0.700 | 0.675 | 0.688 | 0.375 | 0.683 | 0.691 |
| 645 | 0.683 | 0.683 | 0.683 | 0.367 | 0.683 | 0.683 |
| 646 | 0.675 | 0.683 | 0.679 | 0.358 | 0.681 | 0.678 |
| 647 | 0.658 | 0.650 | 0.654 | 0.308 | 0.653 | 0.656 |
| 648 | 0.692 | 0.667 | 0.679 | 0.358 | 0.675 | 0.683 |
| 649 | 0.692 | 0.625 | 0.658 | 0.317 | 0.648 | 0.669 |
| 650 | 0.675 | 0.642 | 0.658 | 0.317 | 0.653 | 0.664 |
| 651 | 0.667 | 0.675 | 0.671 | 0.342 | 0.672 | 0.669 |
| 652 | 0.667 | 0.683 | 0.675 | 0.350 | 0.678 | 0.672 |
| 653 | 0.700 | 0.625 | 0.663 | 0.326 | 0.651 | 0.675 |
| 654 | 0.675 | 0.642 | 0.658 | 0.317 | 0.653 | 0.664 |
| 655 | 0.683 | 0.692 | 0.688 | 0.375 | 0.689 | 0.686 |
| 656 | 0.650 | 0.675 | 0.663 | 0.325 | 0.667 | 0.658 |
| 657 | 0.650 | 0.667 | 0.658 | 0.317 | 0.661 | 0.655 |
| 658 | 0.700 | 0.658 | 0.679 | 0.359 | 0.672 | 0.686 |
| 659 | 0.675 | 0.600 | 0.638 | 0.276 | 0.628 | 0.651 |
| 660 | 0.667 | 0.642 | 0.654 | 0.308 | 0.650 | 0.658 |
| 661 | 0.675 | 0.658 | 0.667 | 0.333 | 0.664 | 0.669 |
| 662 | 0.692 | 0.658 | 0.675 | 0.350 | 0.669 | 0.680 |
| 663 | 0.692 | 0.600 | 0.646 | 0.293 | 0.634 | 0.661 |
| 664 | 0.650 | 0.633 | 0.642 | 0.283 | 0.639 | 0.645 |
| 665 | 0.683 | 0.667 | 0.675 | 0.350 | 0.672 | 0.678 |
| 666 | 0.667 | 0.633 | 0.650 | 0.300 | 0.645 | 0.656 |
| 667 | 0.658 | 0.658 | 0.658 | 0.317 | 0.658 | 0.658 |
| 668 | 0.617 | 0.633 | 0.625 | 0.250 | 0.627 | 0.622 |



|     |       |       |       |       |       |       |
|-----|-------|-------|-------|-------|-------|-------|
| 669 | 0.708 | 0.625 | 0.667 | 0.334 | 0.654 | 0.680 |
| 670 | 0.683 | 0.608 | 0.646 | 0.292 | 0.636 | 0.659 |
| 671 | 0.692 | 0.625 | 0.658 | 0.317 | 0.648 | 0.669 |
| 672 | 0.708 | 0.650 | 0.679 | 0.359 | 0.669 | 0.688 |
| 673 | 0.708 | 0.650 | 0.679 | 0.359 | 0.669 | 0.688 |
| 674 | 0.633 | 0.617 | 0.625 | 0.250 | 0.623 | 0.628 |
| 675 | 0.692 | 0.667 | 0.679 | 0.358 | 0.675 | 0.683 |
| 676 | 0.683 | 0.625 | 0.654 | 0.309 | 0.646 | 0.664 |
| 677 | 0.700 | 0.642 | 0.671 | 0.342 | 0.661 | 0.680 |
| 678 | 0.658 | 0.633 | 0.646 | 0.292 | 0.642 | 0.650 |
| 679 | 0.675 | 0.625 | 0.650 | 0.300 | 0.643 | 0.659 |
| 680 | 0.708 | 0.675 | 0.692 | 0.384 | 0.685 | 0.697 |
| 681 | 0.708 | 0.642 | 0.675 | 0.351 | 0.664 | 0.685 |
| 682 | 0.708 | 0.683 | 0.696 | 0.392 | 0.691 | 0.700 |
| 683 | 0.708 | 0.642 | 0.675 | 0.351 | 0.664 | 0.685 |
| 684 | 0.717 | 0.658 | 0.688 | 0.376 | 0.677 | 0.696 |
| 685 | 0.692 | 0.642 | 0.667 | 0.334 | 0.659 | 0.675 |
| 686 | 0.675 | 0.692 | 0.683 | 0.367 | 0.686 | 0.681 |
| 687 | 0.675 | 0.658 | 0.667 | 0.333 | 0.664 | 0.669 |
| 688 | 0.708 | 0.625 | 0.667 | 0.334 | 0.654 | 0.680 |
| 689 | 0.683 | 0.642 | 0.663 | 0.325 | 0.656 | 0.669 |
| 690 | 0.675 | 0.700 | 0.688 | 0.375 | 0.692 | 0.684 |
| 691 | 0.675 | 0.625 | 0.650 | 0.300 | 0.643 | 0.659 |
| 692 | 0.658 | 0.658 | 0.658 | 0.317 | 0.658 | 0.658 |
| 693 | 0.708 | 0.600 | 0.654 | 0.310 | 0.639 | 0.672 |
| 694 | 0.708 | 0.667 | 0.688 | 0.375 | 0.680 | 0.694 |
| 695 | 0.683 | 0.658 | 0.671 | 0.342 | 0.667 | 0.675 |
| 696 | 0.675 | 0.633 | 0.654 | 0.309 | 0.648 | 0.661 |
| 697 | 0.667 | 0.633 | 0.650 | 0.300 | 0.645 | 0.656 |
| 698 | 0.683 | 0.650 | 0.667 | 0.334 | 0.661 | 0.672 |
| 699 | 0.725 | 0.650 | 0.688 | 0.376 | 0.674 | 0.699 |
| 700 | 0.717 | 0.650 | 0.683 | 0.367 | 0.672 | 0.694 |
| 701 | 0.650 | 0.675 | 0.663 | 0.325 | 0.667 | 0.658 |
| 702 | 0.717 | 0.642 | 0.679 | 0.359 | 0.667 | 0.691 |
| 703 | 0.667 | 0.692 | 0.679 | 0.358 | 0.684 | 0.675 |
| 704 | 0.675 | 0.675 | 0.675 | 0.350 | 0.675 | 0.675 |
| 705 | 0.642 | 0.650 | 0.646 | 0.292 | 0.647 | 0.644 |
| 706 | 0.642 | 0.675 | 0.658 | 0.317 | 0.664 | 0.653 |
| 707 | 0.675 | 0.658 | 0.667 | 0.333 | 0.664 | 0.669 |
| 708 | 0.667 | 0.642 | 0.654 | 0.308 | 0.650 | 0.658 |
| 709 | 0.675 | 0.650 | 0.663 | 0.325 | 0.659 | 0.667 |
| 710 | 0.675 | 0.658 | 0.667 | 0.333 | 0.664 | 0.669 |

|     |       |       |       |       |       |       |
|-----|-------|-------|-------|-------|-------|-------|
| 711 | 0.642 | 0.642 | 0.642 | 0.283 | 0.642 | 0.642 |
| 712 | 0.658 | 0.642 | 0.650 | 0.300 | 0.648 | 0.653 |
| 713 | 0.675 | 0.642 | 0.658 | 0.317 | 0.653 | 0.664 |
| 714 | 0.650 | 0.658 | 0.654 | 0.308 | 0.655 | 0.653 |
| 715 | 0.725 | 0.658 | 0.692 | 0.384 | 0.680 | 0.702 |
| 716 | 0.658 | 0.667 | 0.663 | 0.325 | 0.664 | 0.661 |
| 717 | 0.667 | 0.692 | 0.679 | 0.358 | 0.684 | 0.675 |
| 718 | 0.692 | 0.633 | 0.663 | 0.326 | 0.654 | 0.672 |
| 719 | 0.667 | 0.583 | 0.625 | 0.251 | 0.615 | 0.640 |
| 720 | 0.700 | 0.658 | 0.679 | 0.359 | 0.672 | 0.686 |
| 721 | 0.700 | 0.650 | 0.675 | 0.350 | 0.667 | 0.683 |
| 722 | 0.683 | 0.650 | 0.667 | 0.334 | 0.661 | 0.672 |
| 723 | 0.692 | 0.658 | 0.675 | 0.350 | 0.669 | 0.680 |
| 724 | 0.683 | 0.667 | 0.675 | 0.350 | 0.672 | 0.678 |
| 725 | 0.658 | 0.650 | 0.654 | 0.308 | 0.653 | 0.656 |
| 726 | 0.692 | 0.625 | 0.658 | 0.317 | 0.648 | 0.669 |
| 727 | 0.658 | 0.633 | 0.646 | 0.292 | 0.642 | 0.650 |
| 728 | 0.717 | 0.650 | 0.683 | 0.367 | 0.672 | 0.694 |
| 729 | 0.675 | 0.650 | 0.663 | 0.325 | 0.659 | 0.667 |
| 730 | 0.650 | 0.642 | 0.646 | 0.292 | 0.645 | 0.647 |
| 731 | 0.683 | 0.667 | 0.675 | 0.350 | 0.672 | 0.678 |
| 732 | 0.667 | 0.625 | 0.646 | 0.292 | 0.640 | 0.653 |
| 733 | 0.717 | 0.667 | 0.692 | 0.384 | 0.683 | 0.699 |
| 734 | 0.658 | 0.633 | 0.646 | 0.292 | 0.642 | 0.650 |
| 735 | 0.675 | 0.658 | 0.667 | 0.333 | 0.664 | 0.669 |
| 736 | 0.650 | 0.617 | 0.633 | 0.267 | 0.629 | 0.639 |
| 737 | 0.692 | 0.683 | 0.688 | 0.375 | 0.686 | 0.689 |
| 738 | 0.625 | 0.633 | 0.629 | 0.258 | 0.630 | 0.628 |
| 739 | 0.683 | 0.667 | 0.675 | 0.350 | 0.672 | 0.678 |
| 740 | 0.683 | 0.650 | 0.667 | 0.334 | 0.661 | 0.672 |
| 741 | 0.675 | 0.692 | 0.683 | 0.367 | 0.686 | 0.681 |
| 742 | 0.700 | 0.692 | 0.696 | 0.392 | 0.694 | 0.697 |
| 743 | 0.642 | 0.642 | 0.642 | 0.283 | 0.642 | 0.642 |
| 744 | 0.700 | 0.633 | 0.667 | 0.334 | 0.656 | 0.677 |
| 745 | 0.650 | 0.650 | 0.650 | 0.300 | 0.650 | 0.650 |
| 746 | 0.683 | 0.692 | 0.688 | 0.375 | 0.689 | 0.686 |
| 747 | 0.675 | 0.650 | 0.663 | 0.325 | 0.659 | 0.667 |
| 748 | 0.683 | 0.642 | 0.663 | 0.325 | 0.656 | 0.669 |
| 749 | 0.625 | 0.700 | 0.663 | 0.326 | 0.676 | 0.649 |
| 750 | 0.725 | 0.658 | 0.692 | 0.384 | 0.680 | 0.702 |
| 751 | 0.717 | 0.650 | 0.683 | 0.367 | 0.672 | 0.694 |
| 752 | 0.675 | 0.617 | 0.646 | 0.292 | 0.638 | 0.656 |

|     |       |       |       |       |       |       |
|-----|-------|-------|-------|-------|-------|-------|
| 753 | 0.625 | 0.708 | 0.667 | 0.334 | 0.682 | 0.652 |
| 754 | 0.658 | 0.633 | 0.646 | 0.292 | 0.642 | 0.650 |
| 755 | 0.683 | 0.683 | 0.683 | 0.367 | 0.683 | 0.683 |
| 756 | 0.692 | 0.650 | 0.671 | 0.342 | 0.664 | 0.678 |
| 757 | 0.650 | 0.667 | 0.658 | 0.317 | 0.661 | 0.655 |
| 758 | 0.717 | 0.633 | 0.675 | 0.351 | 0.662 | 0.688 |
| 759 | 0.692 | 0.642 | 0.667 | 0.334 | 0.659 | 0.675 |
| 760 | 0.658 | 0.625 | 0.642 | 0.283 | 0.637 | 0.648 |
| 761 | 0.650 | 0.642 | 0.646 | 0.292 | 0.645 | 0.647 |
| 762 | 0.675 | 0.692 | 0.683 | 0.367 | 0.686 | 0.681 |
| 763 | 0.700 | 0.675 | 0.688 | 0.375 | 0.683 | 0.691 |
| 764 | 0.633 | 0.692 | 0.663 | 0.326 | 0.673 | 0.652 |
| 765 | 0.725 | 0.683 | 0.704 | 0.409 | 0.696 | 0.710 |
| 766 | 0.675 | 0.608 | 0.642 | 0.284 | 0.633 | 0.653 |
| 767 | 0.650 | 0.667 | 0.658 | 0.317 | 0.661 | 0.655 |
| 768 | 0.692 | 0.675 | 0.683 | 0.367 | 0.680 | 0.686 |
| 769 | 0.683 | 0.658 | 0.671 | 0.342 | 0.667 | 0.675 |
| 770 | 0.700 | 0.650 | 0.675 | 0.350 | 0.667 | 0.683 |
| 771 | 0.667 | 0.683 | 0.675 | 0.350 | 0.678 | 0.672 |
| 772 | 0.658 | 0.658 | 0.658 | 0.317 | 0.658 | 0.658 |
| 773 | 0.683 | 0.608 | 0.646 | 0.292 | 0.636 | 0.659 |
| 774 | 0.708 | 0.658 | 0.683 | 0.367 | 0.675 | 0.691 |
| 775 | 0.675 | 0.667 | 0.671 | 0.342 | 0.669 | 0.672 |
| 776 | 0.658 | 0.700 | 0.679 | 0.359 | 0.687 | 0.672 |
| 777 | 0.675 | 0.683 | 0.679 | 0.358 | 0.681 | 0.678 |
| 778 | 0.692 | 0.667 | 0.679 | 0.358 | 0.675 | 0.683 |
| 779 | 0.650 | 0.667 | 0.658 | 0.317 | 0.661 | 0.655 |
| 780 | 0.675 | 0.650 | 0.663 | 0.325 | 0.659 | 0.667 |
| 781 | 0.658 | 0.658 | 0.658 | 0.317 | 0.658 | 0.658 |
| 782 | 0.683 | 0.658 | 0.671 | 0.342 | 0.667 | 0.675 |
| 783 | 0.650 | 0.667 | 0.658 | 0.317 | 0.661 | 0.655 |
| 784 | 0.658 | 0.650 | 0.654 | 0.308 | 0.653 | 0.656 |
| 785 | 0.625 | 0.658 | 0.642 | 0.283 | 0.647 | 0.636 |
| 786 | 0.683 | 0.683 | 0.683 | 0.367 | 0.683 | 0.683 |
| 787 | 0.667 | 0.675 | 0.671 | 0.342 | 0.672 | 0.669 |
| 788 | 0.692 | 0.683 | 0.688 | 0.375 | 0.686 | 0.689 |
| 789 | 0.650 | 0.675 | 0.663 | 0.325 | 0.667 | 0.658 |
| 790 | 0.692 | 0.675 | 0.683 | 0.367 | 0.680 | 0.686 |
| 791 | 0.675 | 0.683 | 0.679 | 0.358 | 0.681 | 0.678 |
| 792 | 0.725 | 0.608 | 0.667 | 0.336 | 0.649 | 0.685 |
| 793 | 0.733 | 0.667 | 0.700 | 0.401 | 0.688 | 0.710 |
| 794 | 0.683 | 0.658 | 0.671 | 0.342 | 0.667 | 0.675 |

|     |       |       |       |       |       |       |
|-----|-------|-------|-------|-------|-------|-------|
| 795 | 0.642 | 0.675 | 0.658 | 0.317 | 0.664 | 0.653 |
| 796 | 0.683 | 0.650 | 0.667 | 0.334 | 0.661 | 0.672 |
| 797 | 0.675 | 0.625 | 0.650 | 0.300 | 0.643 | 0.659 |
| 798 | 0.683 | 0.683 | 0.683 | 0.367 | 0.683 | 0.683 |
| 799 | 0.692 | 0.650 | 0.671 | 0.342 | 0.664 | 0.678 |
| 800 | 0.700 | 0.642 | 0.671 | 0.342 | 0.661 | 0.680 |
| 801 | 0.692 | 0.650 | 0.671 | 0.342 | 0.664 | 0.678 |
| 802 | 0.692 | 0.675 | 0.683 | 0.367 | 0.680 | 0.686 |
| 803 | 0.667 | 0.608 | 0.638 | 0.275 | 0.630 | 0.648 |
| 804 | 0.708 | 0.658 | 0.683 | 0.367 | 0.675 | 0.691 |
| 805 | 0.675 | 0.642 | 0.658 | 0.317 | 0.653 | 0.664 |
| 806 | 0.658 | 0.633 | 0.646 | 0.292 | 0.642 | 0.650 |
| 807 | 0.717 | 0.667 | 0.692 | 0.384 | 0.683 | 0.699 |
| 808 | 0.675 | 0.700 | 0.688 | 0.375 | 0.692 | 0.684 |
| 809 | 0.667 | 0.650 | 0.658 | 0.317 | 0.656 | 0.661 |
| 810 | 0.675 | 0.650 | 0.663 | 0.325 | 0.659 | 0.667 |
| 811 | 0.683 | 0.633 | 0.658 | 0.317 | 0.651 | 0.667 |
| 812 | 0.700 | 0.617 | 0.658 | 0.318 | 0.646 | 0.672 |
| 813 | 0.675 | 0.692 | 0.683 | 0.367 | 0.686 | 0.681 |
| 814 | 0.667 | 0.600 | 0.633 | 0.267 | 0.625 | 0.645 |
| 815 | 0.700 | 0.658 | 0.679 | 0.359 | 0.672 | 0.686 |
| 816 | 0.658 | 0.692 | 0.675 | 0.350 | 0.681 | 0.669 |
| 817 | 0.658 | 0.642 | 0.650 | 0.300 | 0.648 | 0.653 |
| 818 | 0.658 | 0.683 | 0.671 | 0.342 | 0.675 | 0.667 |
| 819 | 0.683 | 0.650 | 0.667 | 0.334 | 0.661 | 0.672 |
| 820 | 0.683 | 0.650 | 0.667 | 0.334 | 0.661 | 0.672 |
| 821 | 0.633 | 0.600 | 0.617 | 0.233 | 0.613 | 0.623 |
| 822 | 0.675 | 0.667 | 0.671 | 0.342 | 0.669 | 0.672 |
| 823 | 0.658 | 0.658 | 0.658 | 0.317 | 0.658 | 0.658 |
| 824 | 0.658 | 0.700 | 0.679 | 0.359 | 0.687 | 0.672 |
| 825 | 0.658 | 0.667 | 0.663 | 0.325 | 0.664 | 0.661 |
| 826 | 0.675 | 0.617 | 0.646 | 0.292 | 0.638 | 0.656 |
| 827 | 0.683 | 0.667 | 0.675 | 0.350 | 0.672 | 0.678 |
| 828 | 0.625 | 0.683 | 0.654 | 0.309 | 0.664 | 0.644 |
| 829 | 0.658 | 0.625 | 0.642 | 0.283 | 0.637 | 0.648 |
| 830 | 0.667 | 0.608 | 0.638 | 0.275 | 0.630 | 0.648 |
| 831 | 0.692 | 0.675 | 0.683 | 0.367 | 0.680 | 0.686 |
| 832 | 0.667 | 0.667 | 0.667 | 0.333 | 0.667 | 0.667 |
| 833 | 0.717 | 0.675 | 0.696 | 0.392 | 0.688 | 0.702 |
| 834 | 0.667 | 0.625 | 0.646 | 0.292 | 0.640 | 0.653 |
| 835 | 0.658 | 0.642 | 0.650 | 0.300 | 0.648 | 0.653 |
| 836 | 0.667 | 0.658 | 0.663 | 0.325 | 0.661 | 0.664 |

|     |       |       |       |       |       |       |
|-----|-------|-------|-------|-------|-------|-------|
| 837 | 0.675 | 0.650 | 0.663 | 0.325 | 0.659 | 0.667 |
| 838 | 0.692 | 0.667 | 0.679 | 0.358 | 0.675 | 0.683 |
| 839 | 0.667 | 0.633 | 0.650 | 0.300 | 0.645 | 0.656 |
| 840 | 0.658 | 0.667 | 0.663 | 0.325 | 0.664 | 0.661 |
| 841 | 0.700 | 0.683 | 0.692 | 0.383 | 0.689 | 0.694 |
| 842 | 0.658 | 0.625 | 0.642 | 0.283 | 0.637 | 0.648 |
| 843 | 0.683 | 0.642 | 0.663 | 0.325 | 0.656 | 0.669 |
| 844 | 0.683 | 0.667 | 0.675 | 0.350 | 0.672 | 0.678 |
| 845 | 0.642 | 0.608 | 0.625 | 0.250 | 0.621 | 0.631 |
| 846 | 0.667 | 0.642 | 0.654 | 0.308 | 0.650 | 0.658 |
| 847 | 0.650 | 0.683 | 0.667 | 0.334 | 0.672 | 0.661 |
| 848 | 0.675 | 0.650 | 0.663 | 0.325 | 0.659 | 0.667 |
| 849 | 0.692 | 0.667 | 0.679 | 0.358 | 0.675 | 0.683 |
| 850 | 0.675 | 0.675 | 0.675 | 0.350 | 0.675 | 0.675 |
| 851 | 0.675 | 0.658 | 0.667 | 0.333 | 0.664 | 0.669 |
| 852 | 0.700 | 0.633 | 0.667 | 0.334 | 0.656 | 0.677 |
| 853 | 0.675 | 0.675 | 0.675 | 0.350 | 0.675 | 0.675 |
| 854 | 0.700 | 0.650 | 0.675 | 0.350 | 0.667 | 0.683 |
| 855 | 0.658 | 0.642 | 0.650 | 0.300 | 0.648 | 0.653 |
| 856 | 0.642 | 0.658 | 0.650 | 0.300 | 0.653 | 0.647 |
| 857 | 0.642 | 0.658 | 0.650 | 0.300 | 0.653 | 0.647 |
| 858 | 0.667 | 0.692 | 0.679 | 0.358 | 0.684 | 0.675 |
| 859 | 0.667 | 0.700 | 0.683 | 0.367 | 0.690 | 0.678 |
| 860 | 0.717 | 0.667 | 0.692 | 0.384 | 0.683 | 0.699 |
| 861 | 0.667 | 0.633 | 0.650 | 0.300 | 0.645 | 0.656 |
| 862 | 0.675 | 0.633 | 0.654 | 0.309 | 0.648 | 0.661 |
| 863 | 0.717 | 0.692 | 0.704 | 0.408 | 0.699 | 0.708 |
| 864 | 0.683 | 0.683 | 0.683 | 0.367 | 0.683 | 0.683 |
| 865 | 0.683 | 0.625 | 0.654 | 0.309 | 0.646 | 0.664 |
| 866 | 0.683 | 0.642 | 0.663 | 0.325 | 0.656 | 0.669 |
| 867 | 0.667 | 0.667 | 0.667 | 0.333 | 0.667 | 0.667 |
| 868 | 0.658 | 0.700 | 0.679 | 0.359 | 0.687 | 0.672 |
| 869 | 0.717 | 0.658 | 0.688 | 0.376 | 0.677 | 0.696 |
| 870 | 0.667 | 0.625 | 0.646 | 0.292 | 0.640 | 0.653 |
| 871 | 0.658 | 0.683 | 0.671 | 0.342 | 0.675 | 0.667 |
| 872 | 0.667 | 0.675 | 0.671 | 0.342 | 0.672 | 0.669 |
| 873 | 0.658 | 0.658 | 0.658 | 0.317 | 0.658 | 0.658 |
| 874 | 0.692 | 0.625 | 0.658 | 0.317 | 0.648 | 0.669 |
| 875 | 0.667 | 0.658 | 0.663 | 0.325 | 0.661 | 0.664 |
| 876 | 0.692 | 0.642 | 0.667 | 0.334 | 0.659 | 0.675 |
| 877 | 0.633 | 0.675 | 0.654 | 0.309 | 0.661 | 0.647 |
| 878 | 0.692 | 0.658 | 0.675 | 0.350 | 0.669 | 0.680 |

|     |       |       |       |       |       |       |
|-----|-------|-------|-------|-------|-------|-------|
| 879 | 0.667 | 0.667 | 0.667 | 0.333 | 0.667 | 0.667 |
| 880 | 0.667 | 0.667 | 0.667 | 0.333 | 0.667 | 0.667 |
| 881 | 0.692 | 0.642 | 0.667 | 0.334 | 0.659 | 0.675 |
| 882 | 0.717 | 0.625 | 0.671 | 0.343 | 0.656 | 0.685 |
| 883 | 0.733 | 0.692 | 0.713 | 0.425 | 0.704 | 0.718 |
| 884 | 0.675 | 0.675 | 0.675 | 0.350 | 0.675 | 0.675 |
| 885 | 0.650 | 0.667 | 0.658 | 0.317 | 0.661 | 0.655 |
| 886 | 0.708 | 0.683 | 0.696 | 0.392 | 0.691 | 0.700 |
| 887 | 0.625 | 0.642 | 0.633 | 0.267 | 0.636 | 0.630 |
| 888 | 0.642 | 0.675 | 0.658 | 0.317 | 0.664 | 0.653 |
| 889 | 0.692 | 0.625 | 0.658 | 0.317 | 0.648 | 0.669 |
| 890 | 0.650 | 0.667 | 0.658 | 0.317 | 0.661 | 0.655 |
| 891 | 0.675 | 0.650 | 0.663 | 0.325 | 0.659 | 0.667 |
| 892 | 0.667 | 0.667 | 0.667 | 0.333 | 0.667 | 0.667 |
| 893 | 0.650 | 0.675 | 0.663 | 0.325 | 0.667 | 0.658 |
| 894 | 0.675 | 0.675 | 0.675 | 0.350 | 0.675 | 0.675 |
| 895 | 0.700 | 0.617 | 0.658 | 0.318 | 0.646 | 0.672 |
| 896 | 0.675 | 0.675 | 0.675 | 0.350 | 0.675 | 0.675 |
| 897 | 0.692 | 0.675 | 0.683 | 0.367 | 0.680 | 0.686 |
| 898 | 0.692 | 0.658 | 0.675 | 0.350 | 0.669 | 0.680 |
| 899 | 0.642 | 0.717 | 0.679 | 0.359 | 0.694 | 0.667 |
| 900 | 0.683 | 0.633 | 0.658 | 0.317 | 0.651 | 0.667 |
| 901 | 0.642 | 0.642 | 0.642 | 0.283 | 0.642 | 0.642 |
| 902 | 0.667 | 0.642 | 0.654 | 0.308 | 0.650 | 0.658 |
| 903 | 0.683 | 0.633 | 0.658 | 0.317 | 0.651 | 0.667 |
| 904 | 0.692 | 0.650 | 0.671 | 0.342 | 0.664 | 0.678 |
| 905 | 0.692 | 0.667 | 0.679 | 0.358 | 0.675 | 0.683 |
| 906 | 0.700 | 0.700 | 0.700 | 0.400 | 0.700 | 0.700 |
| 907 | 0.675 | 0.675 | 0.675 | 0.350 | 0.675 | 0.675 |
| 908 | 0.633 | 0.658 | 0.646 | 0.292 | 0.650 | 0.641 |
| 909 | 0.658 | 0.683 | 0.671 | 0.342 | 0.675 | 0.667 |
| 910 | 0.650 | 0.675 | 0.663 | 0.325 | 0.667 | 0.658 |
| 911 | 0.708 | 0.650 | 0.679 | 0.359 | 0.669 | 0.688 |
| 912 | 0.683 | 0.642 | 0.663 | 0.325 | 0.656 | 0.669 |
| 913 | 0.708 | 0.633 | 0.671 | 0.343 | 0.659 | 0.683 |
| 914 | 0.717 | 0.633 | 0.675 | 0.351 | 0.662 | 0.688 |
| 915 | 0.675 | 0.667 | 0.671 | 0.342 | 0.669 | 0.672 |
| 916 | 0.675 | 0.650 | 0.663 | 0.325 | 0.659 | 0.667 |
| 917 | 0.683 | 0.625 | 0.654 | 0.309 | 0.646 | 0.664 |
| 918 | 0.658 | 0.650 | 0.654 | 0.308 | 0.653 | 0.656 |
| 919 | 0.667 | 0.667 | 0.667 | 0.333 | 0.667 | 0.667 |
| 920 | 0.675 | 0.642 | 0.658 | 0.317 | 0.653 | 0.664 |

|     |       |       |       |       |       |       |
|-----|-------|-------|-------|-------|-------|-------|
| 921 | 0.717 | 0.642 | 0.679 | 0.359 | 0.667 | 0.691 |
| 922 | 0.708 | 0.650 | 0.679 | 0.359 | 0.669 | 0.688 |
| 923 | 0.675 | 0.675 | 0.675 | 0.350 | 0.675 | 0.675 |
| 924 | 0.667 | 0.667 | 0.667 | 0.333 | 0.667 | 0.667 |
| 925 | 0.675 | 0.675 | 0.675 | 0.350 | 0.675 | 0.675 |
| 926 | 0.642 | 0.667 | 0.654 | 0.308 | 0.658 | 0.650 |
| 927 | 0.650 | 0.658 | 0.654 | 0.308 | 0.655 | 0.653 |
| 928 | 0.708 | 0.675 | 0.692 | 0.384 | 0.685 | 0.697 |
| 929 | 0.717 | 0.667 | 0.692 | 0.384 | 0.683 | 0.699 |
| 930 | 0.708 | 0.633 | 0.671 | 0.343 | 0.659 | 0.683 |
| 931 | 0.692 | 0.667 | 0.679 | 0.358 | 0.675 | 0.683 |
| 932 | 0.692 | 0.642 | 0.667 | 0.334 | 0.659 | 0.675 |
| 933 | 0.683 | 0.608 | 0.646 | 0.292 | 0.636 | 0.659 |
| 934 | 0.675 | 0.675 | 0.675 | 0.350 | 0.675 | 0.675 |
| 935 | 0.692 | 0.700 | 0.696 | 0.392 | 0.697 | 0.695 |
| 936 | 0.658 | 0.658 | 0.658 | 0.317 | 0.658 | 0.658 |
| 937 | 0.650 | 0.608 | 0.629 | 0.259 | 0.624 | 0.637 |
| 938 | 0.692 | 0.642 | 0.667 | 0.334 | 0.659 | 0.675 |
| 939 | 0.675 | 0.650 | 0.663 | 0.325 | 0.659 | 0.667 |
| 940 | 0.675 | 0.658 | 0.667 | 0.333 | 0.664 | 0.669 |
| 941 | 0.708 | 0.617 | 0.663 | 0.326 | 0.649 | 0.677 |
| 942 | 0.667 | 0.675 | 0.671 | 0.342 | 0.672 | 0.669 |
| 943 | 0.717 | 0.617 | 0.667 | 0.335 | 0.652 | 0.683 |
| 944 | 0.675 | 0.658 | 0.667 | 0.333 | 0.664 | 0.669 |
| 945 | 0.675 | 0.650 | 0.663 | 0.325 | 0.659 | 0.667 |
| 946 | 0.717 | 0.608 | 0.663 | 0.327 | 0.647 | 0.680 |
| 947 | 0.625 | 0.658 | 0.642 | 0.283 | 0.647 | 0.636 |
| 948 | 0.675 | 0.650 | 0.663 | 0.325 | 0.659 | 0.667 |
| 949 | 0.633 | 0.642 | 0.638 | 0.275 | 0.639 | 0.636 |
| 950 | 0.650 | 0.633 | 0.642 | 0.283 | 0.639 | 0.645 |
| 951 | 0.667 | 0.717 | 0.692 | 0.384 | 0.702 | 0.684 |
| 952 | 0.658 | 0.600 | 0.629 | 0.259 | 0.622 | 0.640 |
| 953 | 0.692 | 0.642 | 0.667 | 0.334 | 0.659 | 0.675 |
| 954 | 0.625 | 0.617 | 0.621 | 0.242 | 0.620 | 0.622 |
| 955 | 0.658 | 0.633 | 0.646 | 0.292 | 0.642 | 0.650 |
| 956 | 0.692 | 0.667 | 0.679 | 0.358 | 0.675 | 0.683 |
| 957 | 0.642 | 0.667 | 0.654 | 0.308 | 0.658 | 0.650 |
| 958 | 0.642 | 0.642 | 0.642 | 0.283 | 0.642 | 0.642 |
| 959 | 0.675 | 0.675 | 0.675 | 0.350 | 0.675 | 0.675 |
| 960 | 0.667 | 0.617 | 0.642 | 0.284 | 0.635 | 0.650 |
| 961 | 0.708 | 0.608 | 0.658 | 0.318 | 0.644 | 0.675 |
| 962 | 0.667 | 0.700 | 0.683 | 0.367 | 0.690 | 0.678 |

|      |       |       |       |       |       |       |
|------|-------|-------|-------|-------|-------|-------|
| 963  | 0.658 | 0.675 | 0.667 | 0.333 | 0.669 | 0.664 |
| 964  | 0.675 | 0.650 | 0.663 | 0.325 | 0.659 | 0.667 |
| 965  | 0.667 | 0.667 | 0.667 | 0.333 | 0.667 | 0.667 |
| 966  | 0.667 | 0.633 | 0.650 | 0.300 | 0.645 | 0.656 |
| 967  | 0.650 | 0.642 | 0.646 | 0.292 | 0.645 | 0.647 |
| 968  | 0.675 | 0.658 | 0.667 | 0.333 | 0.664 | 0.669 |
| 969  | 0.642 | 0.625 | 0.633 | 0.267 | 0.631 | 0.636 |
| 970  | 0.667 | 0.650 | 0.658 | 0.317 | 0.656 | 0.661 |
| 971  | 0.675 | 0.625 | 0.650 | 0.300 | 0.643 | 0.659 |
| 972  | 0.675 | 0.608 | 0.642 | 0.284 | 0.633 | 0.653 |
| 973  | 0.617 | 0.650 | 0.633 | 0.267 | 0.638 | 0.627 |
| 974  | 0.683 | 0.675 | 0.679 | 0.358 | 0.678 | 0.680 |
| 975  | 0.692 | 0.658 | 0.675 | 0.350 | 0.669 | 0.680 |
| 976  | 0.692 | 0.642 | 0.667 | 0.334 | 0.659 | 0.675 |
| 977  | 0.675 | 0.700 | 0.688 | 0.375 | 0.692 | 0.684 |
| 978  | 0.642 | 0.642 | 0.642 | 0.283 | 0.642 | 0.642 |
| 979  | 0.658 | 0.650 | 0.654 | 0.308 | 0.653 | 0.656 |
| 980  | 0.667 | 0.667 | 0.667 | 0.333 | 0.667 | 0.667 |
| 981  | 0.625 | 0.667 | 0.646 | 0.292 | 0.652 | 0.638 |
| 982  | 0.717 | 0.650 | 0.683 | 0.367 | 0.672 | 0.694 |
| 983  | 0.692 | 0.650 | 0.671 | 0.342 | 0.664 | 0.678 |
| 984  | 0.667 | 0.667 | 0.667 | 0.333 | 0.667 | 0.667 |
| 985  | 0.692 | 0.667 | 0.679 | 0.358 | 0.675 | 0.683 |
| 986  | 0.700 | 0.667 | 0.683 | 0.367 | 0.677 | 0.689 |
| 987  | 0.667 | 0.667 | 0.667 | 0.333 | 0.667 | 0.667 |
| 988  | 0.692 | 0.625 | 0.658 | 0.317 | 0.648 | 0.669 |
| 989  | 0.650 | 0.692 | 0.671 | 0.342 | 0.678 | 0.664 |
| 990  | 0.642 | 0.650 | 0.646 | 0.292 | 0.647 | 0.644 |
| 991  | 0.667 | 0.658 | 0.663 | 0.325 | 0.661 | 0.664 |
| 992  | 0.658 | 0.675 | 0.667 | 0.333 | 0.669 | 0.664 |
| 993  | 0.675 | 0.625 | 0.650 | 0.300 | 0.643 | 0.659 |
| 994  | 0.658 | 0.658 | 0.658 | 0.317 | 0.658 | 0.658 |
| 995  | 0.650 | 0.658 | 0.654 | 0.308 | 0.655 | 0.653 |
| 996  | 0.692 | 0.658 | 0.675 | 0.350 | 0.669 | 0.680 |
| 997  | 0.642 | 0.583 | 0.613 | 0.225 | 0.606 | 0.623 |
| 998  | 0.717 | 0.650 | 0.683 | 0.367 | 0.672 | 0.694 |
| 999  | 0.650 | 0.667 | 0.658 | 0.317 | 0.661 | 0.655 |
| 1000 | 0.650 | 0.642 | 0.646 | 0.292 | 0.645 | 0.647 |
| 1001 | 0.658 | 0.625 | 0.642 | 0.283 | 0.637 | 0.648 |
| 1002 | 0.667 | 0.650 | 0.658 | 0.317 | 0.656 | 0.661 |
| 1003 | 0.683 | 0.650 | 0.667 | 0.334 | 0.661 | 0.672 |
| 1004 | 0.650 | 0.683 | 0.667 | 0.334 | 0.672 | 0.661 |



|      |       |       |       |       |       |       |
|------|-------|-------|-------|-------|-------|-------|
| 1005 | 0.658 | 0.675 | 0.667 | 0.333 | 0.669 | 0.664 |
| 1006 | 0.617 | 0.667 | 0.642 | 0.284 | 0.649 | 0.632 |
| 1007 | 0.650 | 0.650 | 0.650 | 0.300 | 0.650 | 0.650 |
| 1008 | 0.675 | 0.683 | 0.679 | 0.358 | 0.681 | 0.678 |
| 1009 | 0.650 | 0.692 | 0.671 | 0.342 | 0.678 | 0.664 |
| 1010 | 0.633 | 0.667 | 0.650 | 0.300 | 0.655 | 0.644 |
| 1011 | 0.675 | 0.633 | 0.654 | 0.309 | 0.648 | 0.661 |
| 1012 | 0.700 | 0.642 | 0.671 | 0.342 | 0.661 | 0.680 |
| 1013 | 0.667 | 0.650 | 0.658 | 0.317 | 0.656 | 0.661 |
| 1014 | 0.658 | 0.633 | 0.646 | 0.292 | 0.642 | 0.650 |
| 1015 | 0.675 | 0.667 | 0.671 | 0.342 | 0.669 | 0.672 |
| 1016 | 0.658 | 0.650 | 0.654 | 0.308 | 0.653 | 0.656 |
| 1017 | 0.683 | 0.683 | 0.683 | 0.367 | 0.683 | 0.683 |
| 1018 | 0.650 | 0.675 | 0.663 | 0.325 | 0.667 | 0.658 |
| 1019 | 0.658 | 0.658 | 0.658 | 0.317 | 0.658 | 0.658 |
| 1020 | 0.667 | 0.658 | 0.663 | 0.325 | 0.661 | 0.664 |

**(2) K-nearest neighbour**

| Number of features | SN    | SP    | ACC   | MCC   | Precision | F1-measure |
|--------------------|-------|-------|-------|-------|-----------|------------|
| 1                  | 0.550 | 0.583 | 0.567 | 0.133 | 0.569     | 0.559      |
| 2                  | 0.667 | 0.650 | 0.658 | 0.317 | 0.656     | 0.661      |
| 3                  | 0.633 | 0.658 | 0.646 | 0.292 | 0.650     | 0.641      |
| 4                  | 0.650 | 0.675 | 0.663 | 0.325 | 0.667     | 0.658      |
| 5                  | 0.717 | 0.733 | 0.725 | 0.450 | 0.729     | 0.723      |
| 6                  | 0.700 | 0.725 | 0.713 | 0.425 | 0.718     | 0.709      |
| 7                  | 0.700 | 0.783 | 0.742 | 0.485 | 0.764     | 0.730      |
| 8                  | 0.675 | 0.783 | 0.729 | 0.461 | 0.757     | 0.714      |
| 9                  | 0.667 | 0.775 | 0.721 | 0.444 | 0.748     | 0.705      |
| 10                 | 0.700 | 0.800 | 0.750 | 0.503 | 0.778     | 0.737      |
| 11                 | 0.692 | 0.842 | 0.767 | 0.539 | 0.814     | 0.748      |
| 12                 | 0.692 | 0.833 | 0.763 | 0.530 | 0.806     | 0.744      |
| 13                 | 0.675 | 0.867 | 0.771 | 0.552 | 0.835     | 0.747      |
| 14                 | 0.617 | 0.867 | 0.742 | 0.499 | 0.822     | 0.705      |
| 15                 | 0.650 | 0.850 | 0.750 | 0.510 | 0.813     | 0.722      |
| 16                 | 0.625 | 0.842 | 0.733 | 0.478 | 0.798     | 0.701      |
| 17                 | 0.625 | 0.833 | 0.729 | 0.469 | 0.789     | 0.698      |
| 18                 | 0.708 | 0.842 | 0.775 | 0.555 | 0.817     | 0.759      |
| 19                 | 0.683 | 0.842 | 0.763 | 0.532 | 0.812     | 0.742      |
| 20                 | 0.675 | 0.867 | 0.771 | 0.552 | 0.835     | 0.747      |
| 21                 | 0.683 | 0.858 | 0.771 | 0.550 | 0.828     | 0.749      |
| 22                 | 0.683 | 0.875 | 0.779 | 0.569 | 0.845     | 0.756      |
| 23                 | 0.675 | 0.867 | 0.771 | 0.552 | 0.835     | 0.747      |

|    |       |       |       |       |       |       |
|----|-------|-------|-------|-------|-------|-------|
| 24 | 0.700 | 0.883 | 0.792 | 0.593 | 0.857 | 0.771 |
| 25 | 0.725 | 0.875 | 0.800 | 0.607 | 0.853 | 0.784 |
| 26 | 0.708 | 0.892 | 0.800 | 0.610 | 0.867 | 0.780 |
| 27 | 0.692 | 0.875 | 0.783 | 0.576 | 0.847 | 0.761 |
| 28 | 0.717 | 0.892 | 0.804 | 0.618 | 0.869 | 0.785 |
| 29 | 0.725 | 0.875 | 0.800 | 0.607 | 0.853 | 0.784 |
| 30 | 0.675 | 0.875 | 0.775 | 0.561 | 0.844 | 0.750 |
| 31 | 0.675 | 0.900 | 0.788 | 0.590 | 0.871 | 0.761 |
| 32 | 0.692 | 0.867 | 0.779 | 0.567 | 0.838 | 0.758 |
| 33 | 0.700 | 0.825 | 0.763 | 0.529 | 0.800 | 0.747 |
| 34 | 0.717 | 0.850 | 0.783 | 0.572 | 0.827 | 0.768 |
| 35 | 0.717 | 0.825 | 0.771 | 0.545 | 0.804 | 0.758 |
| 36 | 0.700 | 0.842 | 0.771 | 0.547 | 0.816 | 0.753 |
| 37 | 0.708 | 0.842 | 0.775 | 0.555 | 0.817 | 0.759 |
| 38 | 0.683 | 0.850 | 0.767 | 0.541 | 0.820 | 0.745 |
| 39 | 0.675 | 0.858 | 0.767 | 0.543 | 0.827 | 0.743 |
| 40 | 0.683 | 0.850 | 0.767 | 0.541 | 0.820 | 0.745 |
| 41 | 0.667 | 0.892 | 0.779 | 0.573 | 0.860 | 0.751 |
| 42 | 0.633 | 0.908 | 0.771 | 0.563 | 0.874 | 0.734 |
| 43 | 0.658 | 0.900 | 0.779 | 0.575 | 0.868 | 0.749 |
| 44 | 0.650 | 0.892 | 0.771 | 0.558 | 0.857 | 0.739 |
| 45 | 0.650 | 0.892 | 0.771 | 0.558 | 0.857 | 0.739 |
| 46 | 0.650 | 0.892 | 0.771 | 0.558 | 0.857 | 0.739 |
| 47 | 0.650 | 0.900 | 0.775 | 0.568 | 0.867 | 0.743 |
| 48 | 0.658 | 0.908 | 0.783 | 0.585 | 0.878 | 0.752 |
| 49 | 0.658 | 0.925 | 0.792 | 0.605 | 0.898 | 0.760 |
| 50 | 0.692 | 0.883 | 0.788 | 0.586 | 0.856 | 0.765 |
| 51 | 0.650 | 0.917 | 0.783 | 0.588 | 0.886 | 0.750 |
| 52 | 0.675 | 0.900 | 0.788 | 0.590 | 0.871 | 0.761 |
| 53 | 0.658 | 0.917 | 0.788 | 0.595 | 0.888 | 0.756 |
| 54 | 0.675 | 0.917 | 0.796 | 0.610 | 0.890 | 0.768 |
| 55 | 0.667 | 0.900 | 0.783 | 0.583 | 0.870 | 0.755 |
| 56 | 0.675 | 0.925 | 0.800 | 0.620 | 0.900 | 0.771 |
| 57 | 0.650 | 0.925 | 0.788 | 0.598 | 0.897 | 0.754 |
| 58 | 0.650 | 0.908 | 0.779 | 0.578 | 0.876 | 0.746 |
| 59 | 0.650 | 0.900 | 0.775 | 0.568 | 0.867 | 0.743 |
| 60 | 0.642 | 0.900 | 0.771 | 0.561 | 0.865 | 0.737 |
| 61 | 0.642 | 0.917 | 0.779 | 0.581 | 0.885 | 0.744 |
| 62 | 0.633 | 0.917 | 0.775 | 0.574 | 0.884 | 0.738 |
| 63 | 0.633 | 0.892 | 0.763 | 0.543 | 0.854 | 0.727 |
| 64 | 0.608 | 0.900 | 0.754 | 0.531 | 0.859 | 0.712 |
| 65 | 0.625 | 0.908 | 0.767 | 0.556 | 0.872 | 0.728 |

|     |       |       |       |       |       |       |
|-----|-------|-------|-------|-------|-------|-------|
| 66  | 0.617 | 0.925 | 0.771 | 0.569 | 0.892 | 0.729 |
| 67  | 0.617 | 0.933 | 0.775 | 0.580 | 0.902 | 0.733 |
| 68  | 0.625 | 0.933 | 0.779 | 0.587 | 0.904 | 0.739 |
| 69  | 0.633 | 0.917 | 0.775 | 0.574 | 0.884 | 0.738 |
| 70  | 0.675 | 0.917 | 0.796 | 0.610 | 0.890 | 0.768 |
| 71  | 0.683 | 0.917 | 0.800 | 0.617 | 0.891 | 0.774 |
| 72  | 0.675 | 0.925 | 0.800 | 0.620 | 0.900 | 0.771 |
| 73  | 0.692 | 0.908 | 0.800 | 0.615 | 0.883 | 0.776 |
| 74  | 0.683 | 0.917 | 0.800 | 0.617 | 0.891 | 0.774 |
| 75  | 0.708 | 0.900 | 0.804 | 0.620 | 0.876 | 0.783 |
| 76  | 0.683 | 0.900 | 0.792 | 0.598 | 0.872 | 0.766 |
| 77  | 0.692 | 0.900 | 0.796 | 0.605 | 0.874 | 0.772 |
| 78  | 0.675 | 0.917 | 0.796 | 0.610 | 0.890 | 0.768 |
| 79  | 0.675 | 0.917 | 0.796 | 0.610 | 0.890 | 0.768 |
| 80  | 0.667 | 0.925 | 0.796 | 0.612 | 0.899 | 0.766 |
| 81  | 0.633 | 0.933 | 0.783 | 0.594 | 0.905 | 0.745 |
| 82  | 0.633 | 0.942 | 0.788 | 0.604 | 0.916 | 0.749 |
| 83  | 0.658 | 0.942 | 0.800 | 0.626 | 0.919 | 0.767 |
| 84  | 0.683 | 0.925 | 0.804 | 0.627 | 0.901 | 0.777 |
| 85  | 0.683 | 0.917 | 0.800 | 0.617 | 0.891 | 0.774 |
| 86  | 0.667 | 0.908 | 0.788 | 0.593 | 0.879 | 0.758 |
| 87  | 0.683 | 0.917 | 0.800 | 0.617 | 0.891 | 0.774 |
| 88  | 0.658 | 0.925 | 0.792 | 0.605 | 0.898 | 0.760 |
| 89  | 0.658 | 0.917 | 0.788 | 0.595 | 0.888 | 0.756 |
| 90  | 0.675 | 0.900 | 0.788 | 0.590 | 0.871 | 0.761 |
| 91  | 0.675 | 0.908 | 0.792 | 0.600 | 0.880 | 0.764 |
| 92  | 0.650 | 0.900 | 0.775 | 0.568 | 0.867 | 0.743 |
| 93  | 0.650 | 0.900 | 0.775 | 0.568 | 0.867 | 0.743 |
| 94  | 0.650 | 0.875 | 0.763 | 0.539 | 0.839 | 0.732 |
| 95  | 0.608 | 0.883 | 0.746 | 0.511 | 0.839 | 0.705 |
| 96  | 0.617 | 0.900 | 0.758 | 0.539 | 0.860 | 0.718 |
| 97  | 0.608 | 0.892 | 0.750 | 0.521 | 0.849 | 0.709 |
| 98  | 0.625 | 0.883 | 0.754 | 0.526 | 0.843 | 0.718 |
| 99  | 0.625 | 0.883 | 0.754 | 0.526 | 0.843 | 0.718 |
| 100 | 0.617 | 0.883 | 0.750 | 0.519 | 0.841 | 0.712 |
| 101 | 0.608 | 0.892 | 0.750 | 0.521 | 0.849 | 0.709 |
| 102 | 0.608 | 0.883 | 0.746 | 0.511 | 0.839 | 0.705 |
| 103 | 0.625 | 0.883 | 0.754 | 0.526 | 0.843 | 0.718 |
| 104 | 0.592 | 0.892 | 0.742 | 0.507 | 0.845 | 0.696 |
| 105 | 0.592 | 0.892 | 0.742 | 0.507 | 0.845 | 0.696 |
| 106 | 0.575 | 0.900 | 0.738 | 0.502 | 0.852 | 0.687 |
| 107 | 0.583 | 0.883 | 0.733 | 0.489 | 0.833 | 0.686 |

|     |       |       |       |       |       |       |
|-----|-------|-------|-------|-------|-------|-------|
| 108 | 0.583 | 0.908 | 0.746 | 0.520 | 0.864 | 0.697 |
| 109 | 0.608 | 0.908 | 0.758 | 0.542 | 0.869 | 0.716 |
| 110 | 0.625 | 0.900 | 0.763 | 0.546 | 0.862 | 0.725 |
| 111 | 0.608 | 0.892 | 0.750 | 0.521 | 0.849 | 0.709 |
| 112 | 0.617 | 0.900 | 0.758 | 0.539 | 0.860 | 0.718 |
| 113 | 0.617 | 0.900 | 0.758 | 0.539 | 0.860 | 0.718 |
| 114 | 0.617 | 0.883 | 0.750 | 0.519 | 0.841 | 0.712 |
| 115 | 0.608 | 0.875 | 0.742 | 0.501 | 0.830 | 0.702 |
| 116 | 0.592 | 0.875 | 0.733 | 0.487 | 0.826 | 0.689 |
| 117 | 0.625 | 0.875 | 0.750 | 0.516 | 0.833 | 0.714 |
| 118 | 0.633 | 0.883 | 0.758 | 0.534 | 0.844 | 0.724 |
| 119 | 0.608 | 0.867 | 0.738 | 0.492 | 0.820 | 0.699 |
| 120 | 0.625 | 0.867 | 0.746 | 0.507 | 0.824 | 0.711 |
| 121 | 0.600 | 0.858 | 0.729 | 0.474 | 0.809 | 0.689 |
| 122 | 0.608 | 0.875 | 0.742 | 0.501 | 0.830 | 0.702 |
| 123 | 0.617 | 0.858 | 0.738 | 0.490 | 0.813 | 0.701 |
| 124 | 0.633 | 0.867 | 0.750 | 0.514 | 0.826 | 0.717 |
| 125 | 0.633 | 0.883 | 0.758 | 0.534 | 0.844 | 0.724 |
| 126 | 0.633 | 0.892 | 0.763 | 0.543 | 0.854 | 0.727 |
| 127 | 0.633 | 0.875 | 0.754 | 0.524 | 0.835 | 0.720 |
| 128 | 0.617 | 0.883 | 0.750 | 0.519 | 0.841 | 0.712 |
| 129 | 0.600 | 0.867 | 0.733 | 0.484 | 0.818 | 0.692 |
| 130 | 0.642 | 0.883 | 0.763 | 0.541 | 0.846 | 0.730 |
| 131 | 0.633 | 0.867 | 0.750 | 0.514 | 0.826 | 0.717 |
| 132 | 0.625 | 0.875 | 0.750 | 0.516 | 0.833 | 0.714 |
| 133 | 0.625 | 0.883 | 0.754 | 0.526 | 0.843 | 0.718 |
| 134 | 0.625 | 0.875 | 0.750 | 0.516 | 0.833 | 0.714 |
| 135 | 0.633 | 0.883 | 0.758 | 0.534 | 0.844 | 0.724 |
| 136 | 0.642 | 0.883 | 0.763 | 0.541 | 0.846 | 0.730 |
| 137 | 0.633 | 0.867 | 0.750 | 0.514 | 0.826 | 0.717 |
| 138 | 0.642 | 0.875 | 0.758 | 0.531 | 0.837 | 0.726 |
| 139 | 0.633 | 0.875 | 0.754 | 0.524 | 0.835 | 0.720 |
| 140 | 0.633 | 0.858 | 0.746 | 0.505 | 0.817 | 0.714 |
| 141 | 0.633 | 0.850 | 0.742 | 0.495 | 0.809 | 0.710 |
| 142 | 0.642 | 0.842 | 0.742 | 0.493 | 0.802 | 0.713 |
| 143 | 0.633 | 0.842 | 0.738 | 0.486 | 0.800 | 0.707 |
| 144 | 0.633 | 0.842 | 0.738 | 0.486 | 0.800 | 0.707 |
| 145 | 0.625 | 0.875 | 0.750 | 0.516 | 0.833 | 0.714 |
| 146 | 0.625 | 0.867 | 0.746 | 0.507 | 0.824 | 0.711 |
| 147 | 0.625 | 0.867 | 0.746 | 0.507 | 0.824 | 0.711 |
| 148 | 0.625 | 0.867 | 0.746 | 0.507 | 0.824 | 0.711 |
| 149 | 0.633 | 0.867 | 0.750 | 0.514 | 0.826 | 0.717 |

|     |       |       |       |       |       |       |
|-----|-------|-------|-------|-------|-------|-------|
| 150 | 0.633 | 0.875 | 0.754 | 0.524 | 0.835 | 0.720 |
| 151 | 0.625 | 0.875 | 0.750 | 0.516 | 0.833 | 0.714 |
| 152 | 0.642 | 0.867 | 0.754 | 0.522 | 0.828 | 0.723 |
| 153 | 0.650 | 0.867 | 0.758 | 0.529 | 0.830 | 0.729 |
| 154 | 0.642 | 0.850 | 0.746 | 0.503 | 0.811 | 0.716 |
| 155 | 0.642 | 0.850 | 0.746 | 0.503 | 0.811 | 0.716 |
| 156 | 0.658 | 0.850 | 0.754 | 0.518 | 0.814 | 0.728 |
| 157 | 0.658 | 0.875 | 0.767 | 0.546 | 0.840 | 0.738 |
| 158 | 0.650 | 0.875 | 0.763 | 0.539 | 0.839 | 0.732 |
| 159 | 0.658 | 0.858 | 0.758 | 0.527 | 0.823 | 0.731 |
| 160 | 0.658 | 0.850 | 0.754 | 0.518 | 0.814 | 0.728 |
| 161 | 0.650 | 0.850 | 0.750 | 0.510 | 0.813 | 0.722 |
| 162 | 0.650 | 0.850 | 0.750 | 0.510 | 0.813 | 0.722 |
| 163 | 0.650 | 0.850 | 0.750 | 0.510 | 0.813 | 0.722 |
| 164 | 0.658 | 0.850 | 0.754 | 0.518 | 0.814 | 0.728 |
| 165 | 0.658 | 0.850 | 0.754 | 0.518 | 0.814 | 0.728 |
| 166 | 0.650 | 0.867 | 0.758 | 0.529 | 0.830 | 0.729 |
| 167 | 0.658 | 0.850 | 0.754 | 0.518 | 0.814 | 0.728 |
| 168 | 0.633 | 0.850 | 0.742 | 0.495 | 0.809 | 0.710 |
| 169 | 0.633 | 0.867 | 0.750 | 0.514 | 0.826 | 0.717 |
| 170 | 0.642 | 0.850 | 0.746 | 0.503 | 0.811 | 0.716 |
| 171 | 0.642 | 0.858 | 0.750 | 0.512 | 0.819 | 0.720 |
| 172 | 0.650 | 0.867 | 0.758 | 0.529 | 0.830 | 0.729 |
| 173 | 0.667 | 0.858 | 0.763 | 0.535 | 0.825 | 0.737 |
| 174 | 0.692 | 0.867 | 0.779 | 0.567 | 0.838 | 0.758 |
| 175 | 0.675 | 0.867 | 0.771 | 0.552 | 0.835 | 0.747 |
| 176 | 0.675 | 0.867 | 0.771 | 0.552 | 0.835 | 0.747 |
| 177 | 0.675 | 0.875 | 0.775 | 0.561 | 0.844 | 0.750 |
| 178 | 0.658 | 0.867 | 0.763 | 0.537 | 0.832 | 0.735 |
| 179 | 0.667 | 0.900 | 0.783 | 0.583 | 0.870 | 0.755 |
| 180 | 0.667 | 0.875 | 0.771 | 0.554 | 0.842 | 0.744 |
| 181 | 0.667 | 0.883 | 0.775 | 0.563 | 0.851 | 0.748 |
| 182 | 0.667 | 0.883 | 0.775 | 0.563 | 0.851 | 0.748 |
| 183 | 0.675 | 0.875 | 0.775 | 0.561 | 0.844 | 0.750 |
| 184 | 0.658 | 0.867 | 0.763 | 0.537 | 0.832 | 0.735 |
| 185 | 0.675 | 0.867 | 0.771 | 0.552 | 0.835 | 0.747 |
| 186 | 0.667 | 0.875 | 0.771 | 0.554 | 0.842 | 0.744 |
| 187 | 0.650 | 0.858 | 0.754 | 0.520 | 0.821 | 0.726 |
| 188 | 0.633 | 0.867 | 0.750 | 0.514 | 0.826 | 0.717 |
| 189 | 0.633 | 0.858 | 0.746 | 0.505 | 0.817 | 0.714 |
| 190 | 0.633 | 0.867 | 0.750 | 0.514 | 0.826 | 0.717 |
| 191 | 0.625 | 0.867 | 0.746 | 0.507 | 0.824 | 0.711 |

|     |       |       |       |       |       |       |
|-----|-------|-------|-------|-------|-------|-------|
| 192 | 0.617 | 0.867 | 0.742 | 0.499 | 0.822 | 0.705 |
| 193 | 0.617 | 0.867 | 0.742 | 0.499 | 0.822 | 0.705 |
| 194 | 0.625 | 0.875 | 0.750 | 0.516 | 0.833 | 0.714 |
| 195 | 0.633 | 0.867 | 0.750 | 0.514 | 0.826 | 0.717 |
| 196 | 0.625 | 0.883 | 0.754 | 0.526 | 0.843 | 0.718 |
| 197 | 0.625 | 0.883 | 0.754 | 0.526 | 0.843 | 0.718 |
| 198 | 0.633 | 0.875 | 0.754 | 0.524 | 0.835 | 0.720 |
| 199 | 0.650 | 0.867 | 0.758 | 0.529 | 0.830 | 0.729 |
| 200 | 0.650 | 0.867 | 0.758 | 0.529 | 0.830 | 0.729 |
| 201 | 0.625 | 0.875 | 0.750 | 0.516 | 0.833 | 0.714 |
| 202 | 0.633 | 0.875 | 0.754 | 0.524 | 0.835 | 0.720 |
| 203 | 0.633 | 0.875 | 0.754 | 0.524 | 0.835 | 0.720 |
| 204 | 0.633 | 0.875 | 0.754 | 0.524 | 0.835 | 0.720 |
| 205 | 0.642 | 0.875 | 0.758 | 0.531 | 0.837 | 0.726 |
| 206 | 0.642 | 0.875 | 0.758 | 0.531 | 0.837 | 0.726 |
| 207 | 0.650 | 0.875 | 0.763 | 0.539 | 0.839 | 0.732 |
| 208 | 0.625 | 0.875 | 0.750 | 0.516 | 0.833 | 0.714 |
| 209 | 0.625 | 0.867 | 0.746 | 0.507 | 0.824 | 0.711 |
| 210 | 0.642 | 0.883 | 0.763 | 0.541 | 0.846 | 0.730 |
| 211 | 0.642 | 0.883 | 0.763 | 0.541 | 0.846 | 0.730 |
| 212 | 0.650 | 0.900 | 0.775 | 0.568 | 0.867 | 0.743 |
| 213 | 0.650 | 0.900 | 0.775 | 0.568 | 0.867 | 0.743 |
| 214 | 0.642 | 0.908 | 0.775 | 0.571 | 0.875 | 0.740 |
| 215 | 0.658 | 0.900 | 0.779 | 0.575 | 0.868 | 0.749 |
| 216 | 0.658 | 0.908 | 0.783 | 0.585 | 0.878 | 0.752 |
| 217 | 0.667 | 0.883 | 0.775 | 0.563 | 0.851 | 0.748 |
| 218 | 0.658 | 0.883 | 0.771 | 0.556 | 0.849 | 0.742 |
| 219 | 0.658 | 0.875 | 0.767 | 0.546 | 0.840 | 0.738 |
| 220 | 0.667 | 0.883 | 0.775 | 0.563 | 0.851 | 0.748 |
| 221 | 0.667 | 0.883 | 0.775 | 0.563 | 0.851 | 0.748 |
| 222 | 0.658 | 0.883 | 0.771 | 0.556 | 0.849 | 0.742 |
| 223 | 0.650 | 0.883 | 0.767 | 0.548 | 0.848 | 0.736 |
| 224 | 0.667 | 0.892 | 0.779 | 0.573 | 0.860 | 0.751 |
| 225 | 0.658 | 0.900 | 0.779 | 0.575 | 0.868 | 0.749 |
| 226 | 0.667 | 0.900 | 0.783 | 0.583 | 0.870 | 0.755 |
| 227 | 0.658 | 0.900 | 0.779 | 0.575 | 0.868 | 0.749 |
| 228 | 0.658 | 0.883 | 0.771 | 0.556 | 0.849 | 0.742 |
| 229 | 0.650 | 0.892 | 0.771 | 0.558 | 0.857 | 0.739 |
| 230 | 0.650 | 0.892 | 0.771 | 0.558 | 0.857 | 0.739 |
| 231 | 0.658 | 0.892 | 0.775 | 0.566 | 0.859 | 0.745 |
| 232 | 0.658 | 0.900 | 0.779 | 0.575 | 0.868 | 0.749 |
| 233 | 0.658 | 0.900 | 0.779 | 0.575 | 0.868 | 0.749 |

|     |       |       |       |       |       |       |
|-----|-------|-------|-------|-------|-------|-------|
| 234 | 0.667 | 0.900 | 0.783 | 0.583 | 0.870 | 0.755 |
| 235 | 0.667 | 0.900 | 0.783 | 0.583 | 0.870 | 0.755 |
| 236 | 0.667 | 0.900 | 0.783 | 0.583 | 0.870 | 0.755 |
| 237 | 0.658 | 0.908 | 0.783 | 0.585 | 0.878 | 0.752 |
| 238 | 0.650 | 0.908 | 0.779 | 0.578 | 0.876 | 0.746 |
| 239 | 0.642 | 0.908 | 0.775 | 0.571 | 0.875 | 0.740 |
| 240 | 0.650 | 0.908 | 0.779 | 0.578 | 0.876 | 0.746 |
| 241 | 0.642 | 0.900 | 0.771 | 0.561 | 0.865 | 0.737 |
| 242 | 0.658 | 0.900 | 0.779 | 0.575 | 0.868 | 0.749 |
| 243 | 0.633 | 0.900 | 0.767 | 0.553 | 0.864 | 0.731 |
| 244 | 0.642 | 0.900 | 0.771 | 0.561 | 0.865 | 0.737 |
| 245 | 0.642 | 0.917 | 0.779 | 0.581 | 0.885 | 0.744 |
| 246 | 0.658 | 0.917 | 0.788 | 0.595 | 0.888 | 0.756 |
| 247 | 0.650 | 0.917 | 0.783 | 0.588 | 0.886 | 0.750 |
| 248 | 0.667 | 0.900 | 0.783 | 0.583 | 0.870 | 0.755 |
| 249 | 0.650 | 0.892 | 0.771 | 0.558 | 0.857 | 0.739 |
| 250 | 0.642 | 0.917 | 0.779 | 0.581 | 0.885 | 0.744 |
| 251 | 0.642 | 0.925 | 0.783 | 0.591 | 0.895 | 0.748 |
| 252 | 0.650 | 0.908 | 0.779 | 0.578 | 0.876 | 0.746 |
| 253 | 0.633 | 0.917 | 0.775 | 0.574 | 0.884 | 0.738 |
| 254 | 0.642 | 0.917 | 0.779 | 0.581 | 0.885 | 0.744 |
| 255 | 0.642 | 0.917 | 0.779 | 0.581 | 0.885 | 0.744 |
| 256 | 0.650 | 0.917 | 0.783 | 0.588 | 0.886 | 0.750 |
| 257 | 0.650 | 0.917 | 0.783 | 0.588 | 0.886 | 0.750 |
| 258 | 0.650 | 0.917 | 0.783 | 0.588 | 0.886 | 0.750 |
| 259 | 0.650 | 0.917 | 0.783 | 0.588 | 0.886 | 0.750 |
| 260 | 0.658 | 0.917 | 0.788 | 0.595 | 0.888 | 0.756 |
| 261 | 0.650 | 0.917 | 0.783 | 0.588 | 0.886 | 0.750 |
| 262 | 0.650 | 0.917 | 0.783 | 0.588 | 0.886 | 0.750 |
| 263 | 0.642 | 0.908 | 0.775 | 0.571 | 0.875 | 0.740 |
| 264 | 0.642 | 0.908 | 0.775 | 0.571 | 0.875 | 0.740 |
| 265 | 0.650 | 0.917 | 0.783 | 0.588 | 0.886 | 0.750 |
| 266 | 0.650 | 0.925 | 0.788 | 0.598 | 0.897 | 0.754 |
| 267 | 0.650 | 0.925 | 0.788 | 0.598 | 0.897 | 0.754 |
| 268 | 0.650 | 0.933 | 0.792 | 0.608 | 0.907 | 0.757 |
| 269 | 0.658 | 0.917 | 0.788 | 0.595 | 0.888 | 0.756 |
| 270 | 0.667 | 0.900 | 0.783 | 0.583 | 0.870 | 0.755 |
| 271 | 0.675 | 0.917 | 0.796 | 0.610 | 0.890 | 0.768 |
| 272 | 0.667 | 0.925 | 0.796 | 0.612 | 0.899 | 0.766 |
| 273 | 0.667 | 0.925 | 0.796 | 0.612 | 0.899 | 0.766 |
| 274 | 0.675 | 0.925 | 0.800 | 0.620 | 0.900 | 0.771 |
| 275 | 0.675 | 0.917 | 0.796 | 0.610 | 0.890 | 0.768 |

|     |       |       |       |       |       |       |
|-----|-------|-------|-------|-------|-------|-------|
| 276 | 0.658 | 0.908 | 0.783 | 0.585 | 0.878 | 0.752 |
| 277 | 0.650 | 0.917 | 0.783 | 0.588 | 0.886 | 0.750 |
| 278 | 0.658 | 0.908 | 0.783 | 0.585 | 0.878 | 0.752 |
| 279 | 0.650 | 0.908 | 0.779 | 0.578 | 0.876 | 0.746 |
| 280 | 0.642 | 0.908 | 0.775 | 0.571 | 0.875 | 0.740 |
| 281 | 0.642 | 0.908 | 0.775 | 0.571 | 0.875 | 0.740 |
| 282 | 0.650 | 0.908 | 0.779 | 0.578 | 0.876 | 0.746 |
| 283 | 0.650 | 0.908 | 0.779 | 0.578 | 0.876 | 0.746 |
| 284 | 0.658 | 0.908 | 0.783 | 0.585 | 0.878 | 0.752 |
| 285 | 0.658 | 0.900 | 0.779 | 0.575 | 0.868 | 0.749 |
| 286 | 0.650 | 0.900 | 0.775 | 0.568 | 0.867 | 0.743 |
| 287 | 0.650 | 0.908 | 0.779 | 0.578 | 0.876 | 0.746 |
| 288 | 0.633 | 0.908 | 0.771 | 0.563 | 0.874 | 0.734 |
| 289 | 0.633 | 0.908 | 0.771 | 0.563 | 0.874 | 0.734 |
| 290 | 0.667 | 0.908 | 0.788 | 0.593 | 0.879 | 0.758 |
| 291 | 0.658 | 0.917 | 0.788 | 0.595 | 0.888 | 0.756 |
| 292 | 0.650 | 0.900 | 0.775 | 0.568 | 0.867 | 0.743 |
| 293 | 0.633 | 0.900 | 0.767 | 0.553 | 0.864 | 0.731 |
| 294 | 0.633 | 0.892 | 0.763 | 0.543 | 0.854 | 0.727 |
| 295 | 0.633 | 0.892 | 0.763 | 0.543 | 0.854 | 0.727 |
| 296 | 0.633 | 0.900 | 0.767 | 0.553 | 0.864 | 0.731 |
| 297 | 0.625 | 0.900 | 0.763 | 0.546 | 0.862 | 0.725 |
| 298 | 0.633 | 0.900 | 0.767 | 0.553 | 0.864 | 0.731 |
| 299 | 0.633 | 0.900 | 0.767 | 0.553 | 0.864 | 0.731 |
| 300 | 0.633 | 0.908 | 0.771 | 0.563 | 0.874 | 0.734 |
| 301 | 0.633 | 0.908 | 0.771 | 0.563 | 0.874 | 0.734 |
| 302 | 0.650 | 0.908 | 0.779 | 0.578 | 0.876 | 0.746 |
| 303 | 0.658 | 0.917 | 0.788 | 0.595 | 0.888 | 0.756 |
| 304 | 0.642 | 0.917 | 0.779 | 0.581 | 0.885 | 0.744 |
| 305 | 0.642 | 0.917 | 0.779 | 0.581 | 0.885 | 0.744 |
| 306 | 0.642 | 0.917 | 0.779 | 0.581 | 0.885 | 0.744 |
| 307 | 0.642 | 0.917 | 0.779 | 0.581 | 0.885 | 0.744 |
| 308 | 0.633 | 0.908 | 0.771 | 0.563 | 0.874 | 0.734 |
| 309 | 0.633 | 0.908 | 0.771 | 0.563 | 0.874 | 0.734 |
| 310 | 0.658 | 0.908 | 0.783 | 0.585 | 0.878 | 0.752 |
| 311 | 0.650 | 0.908 | 0.779 | 0.578 | 0.876 | 0.746 |
| 312 | 0.642 | 0.900 | 0.771 | 0.561 | 0.865 | 0.737 |
| 313 | 0.667 | 0.900 | 0.783 | 0.583 | 0.870 | 0.755 |
| 314 | 0.633 | 0.900 | 0.767 | 0.553 | 0.864 | 0.731 |
| 315 | 0.650 | 0.908 | 0.779 | 0.578 | 0.876 | 0.746 |
| 316 | 0.667 | 0.908 | 0.788 | 0.593 | 0.879 | 0.758 |
| 317 | 0.675 | 0.900 | 0.788 | 0.590 | 0.871 | 0.761 |



|     |       |       |       |       |       |       |
|-----|-------|-------|-------|-------|-------|-------|
| 318 | 0.658 | 0.900 | 0.779 | 0.575 | 0.868 | 0.749 |
| 319 | 0.658 | 0.900 | 0.779 | 0.575 | 0.868 | 0.749 |
| 320 | 0.658 | 0.900 | 0.779 | 0.575 | 0.868 | 0.749 |
| 321 | 0.650 | 0.900 | 0.775 | 0.568 | 0.867 | 0.743 |
| 322 | 0.650 | 0.900 | 0.775 | 0.568 | 0.867 | 0.743 |
| 323 | 0.667 | 0.900 | 0.783 | 0.583 | 0.870 | 0.755 |
| 324 | 0.650 | 0.908 | 0.779 | 0.578 | 0.876 | 0.746 |
| 325 | 0.642 | 0.900 | 0.771 | 0.561 | 0.865 | 0.737 |
| 326 | 0.642 | 0.900 | 0.771 | 0.561 | 0.865 | 0.737 |
| 327 | 0.642 | 0.900 | 0.771 | 0.561 | 0.865 | 0.737 |
| 328 | 0.650 | 0.908 | 0.779 | 0.578 | 0.876 | 0.746 |
| 329 | 0.658 | 0.908 | 0.783 | 0.585 | 0.878 | 0.752 |
| 330 | 0.675 | 0.900 | 0.788 | 0.590 | 0.871 | 0.761 |
| 331 | 0.667 | 0.900 | 0.783 | 0.583 | 0.870 | 0.755 |
| 332 | 0.675 | 0.900 | 0.788 | 0.590 | 0.871 | 0.761 |
| 333 | 0.692 | 0.900 | 0.796 | 0.605 | 0.874 | 0.772 |
| 334 | 0.692 | 0.900 | 0.796 | 0.605 | 0.874 | 0.772 |
| 335 | 0.700 | 0.900 | 0.800 | 0.612 | 0.875 | 0.778 |
| 336 | 0.692 | 0.892 | 0.792 | 0.595 | 0.865 | 0.769 |
| 337 | 0.700 | 0.892 | 0.796 | 0.603 | 0.866 | 0.774 |
| 338 | 0.692 | 0.900 | 0.796 | 0.605 | 0.874 | 0.772 |
| 339 | 0.700 | 0.892 | 0.796 | 0.603 | 0.866 | 0.774 |
| 340 | 0.700 | 0.892 | 0.796 | 0.603 | 0.866 | 0.774 |
| 341 | 0.683 | 0.892 | 0.788 | 0.588 | 0.863 | 0.763 |
| 342 | 0.683 | 0.892 | 0.788 | 0.588 | 0.863 | 0.763 |
| 343 | 0.683 | 0.892 | 0.788 | 0.588 | 0.863 | 0.763 |
| 344 | 0.683 | 0.892 | 0.788 | 0.588 | 0.863 | 0.763 |
| 345 | 0.683 | 0.892 | 0.788 | 0.588 | 0.863 | 0.763 |
| 346 | 0.675 | 0.892 | 0.783 | 0.580 | 0.862 | 0.757 |
| 347 | 0.683 | 0.892 | 0.788 | 0.588 | 0.863 | 0.763 |
| 348 | 0.683 | 0.892 | 0.788 | 0.588 | 0.863 | 0.763 |
| 349 | 0.683 | 0.892 | 0.788 | 0.588 | 0.863 | 0.763 |
| 350 | 0.692 | 0.892 | 0.792 | 0.595 | 0.865 | 0.769 |
| 351 | 0.683 | 0.892 | 0.788 | 0.588 | 0.863 | 0.763 |
| 352 | 0.667 | 0.892 | 0.779 | 0.573 | 0.860 | 0.751 |
| 353 | 0.667 | 0.892 | 0.779 | 0.573 | 0.860 | 0.751 |
| 354 | 0.667 | 0.892 | 0.779 | 0.573 | 0.860 | 0.751 |
| 355 | 0.658 | 0.900 | 0.779 | 0.575 | 0.868 | 0.749 |
| 356 | 0.650 | 0.908 | 0.779 | 0.578 | 0.876 | 0.746 |
| 357 | 0.667 | 0.900 | 0.783 | 0.583 | 0.870 | 0.755 |
| 358 | 0.675 | 0.900 | 0.788 | 0.590 | 0.871 | 0.761 |
| 359 | 0.675 | 0.900 | 0.788 | 0.590 | 0.871 | 0.761 |

|     |       |       |       |       |       |       |
|-----|-------|-------|-------|-------|-------|-------|
| 360 | 0.675 | 0.900 | 0.788 | 0.590 | 0.871 | 0.761 |
| 361 | 0.667 | 0.900 | 0.783 | 0.583 | 0.870 | 0.755 |
| 362 | 0.667 | 0.892 | 0.779 | 0.573 | 0.860 | 0.751 |
| 363 | 0.667 | 0.883 | 0.775 | 0.563 | 0.851 | 0.748 |
| 364 | 0.667 | 0.892 | 0.779 | 0.573 | 0.860 | 0.751 |
| 365 | 0.658 | 0.892 | 0.775 | 0.566 | 0.859 | 0.745 |
| 366 | 0.658 | 0.883 | 0.771 | 0.556 | 0.849 | 0.742 |
| 367 | 0.650 | 0.883 | 0.767 | 0.548 | 0.848 | 0.736 |
| 368 | 0.650 | 0.892 | 0.771 | 0.558 | 0.857 | 0.739 |
| 369 | 0.658 | 0.900 | 0.779 | 0.575 | 0.868 | 0.749 |
| 370 | 0.667 | 0.900 | 0.783 | 0.583 | 0.870 | 0.755 |
| 371 | 0.675 | 0.875 | 0.775 | 0.561 | 0.844 | 0.750 |
| 372 | 0.675 | 0.867 | 0.771 | 0.552 | 0.835 | 0.747 |
| 373 | 0.683 | 0.867 | 0.775 | 0.559 | 0.837 | 0.752 |
| 374 | 0.683 | 0.883 | 0.783 | 0.578 | 0.854 | 0.759 |
| 375 | 0.683 | 0.867 | 0.775 | 0.559 | 0.837 | 0.752 |
| 376 | 0.683 | 0.850 | 0.767 | 0.541 | 0.820 | 0.745 |
| 377 | 0.683 | 0.858 | 0.771 | 0.550 | 0.828 | 0.749 |
| 378 | 0.683 | 0.858 | 0.771 | 0.550 | 0.828 | 0.749 |
| 379 | 0.683 | 0.858 | 0.771 | 0.550 | 0.828 | 0.749 |
| 380 | 0.675 | 0.867 | 0.771 | 0.552 | 0.835 | 0.747 |
| 381 | 0.667 | 0.867 | 0.767 | 0.544 | 0.833 | 0.741 |
| 382 | 0.650 | 0.867 | 0.758 | 0.529 | 0.830 | 0.729 |
| 383 | 0.642 | 0.858 | 0.750 | 0.512 | 0.819 | 0.720 |
| 384 | 0.650 | 0.867 | 0.758 | 0.529 | 0.830 | 0.729 |
| 385 | 0.642 | 0.867 | 0.754 | 0.522 | 0.828 | 0.723 |
| 386 | 0.658 | 0.875 | 0.767 | 0.546 | 0.840 | 0.738 |
| 387 | 0.658 | 0.867 | 0.763 | 0.537 | 0.832 | 0.735 |
| 388 | 0.642 | 0.875 | 0.758 | 0.531 | 0.837 | 0.726 |
| 389 | 0.608 | 0.875 | 0.742 | 0.501 | 0.830 | 0.702 |
| 390 | 0.650 | 0.875 | 0.763 | 0.539 | 0.839 | 0.732 |
| 391 | 0.650 | 0.875 | 0.763 | 0.539 | 0.839 | 0.732 |
| 392 | 0.642 | 0.867 | 0.754 | 0.522 | 0.828 | 0.723 |
| 393 | 0.633 | 0.867 | 0.750 | 0.514 | 0.826 | 0.717 |
| 394 | 0.633 | 0.875 | 0.754 | 0.524 | 0.835 | 0.720 |
| 395 | 0.642 | 0.875 | 0.758 | 0.531 | 0.837 | 0.726 |
| 396 | 0.642 | 0.883 | 0.763 | 0.541 | 0.846 | 0.730 |
| 397 | 0.633 | 0.883 | 0.758 | 0.534 | 0.844 | 0.724 |
| 398 | 0.642 | 0.892 | 0.767 | 0.551 | 0.856 | 0.733 |
| 399 | 0.650 | 0.892 | 0.771 | 0.558 | 0.857 | 0.739 |
| 400 | 0.650 | 0.892 | 0.771 | 0.558 | 0.857 | 0.739 |
| 401 | 0.650 | 0.900 | 0.775 | 0.568 | 0.867 | 0.743 |

|     |       |       |       |       |       |       |
|-----|-------|-------|-------|-------|-------|-------|
| 402 | 0.658 | 0.900 | 0.779 | 0.575 | 0.868 | 0.749 |
| 403 | 0.658 | 0.900 | 0.779 | 0.575 | 0.868 | 0.749 |
| 404 | 0.650 | 0.892 | 0.771 | 0.558 | 0.857 | 0.739 |
| 405 | 0.650 | 0.892 | 0.771 | 0.558 | 0.857 | 0.739 |
| 406 | 0.658 | 0.892 | 0.775 | 0.566 | 0.859 | 0.745 |
| 407 | 0.667 | 0.892 | 0.779 | 0.573 | 0.860 | 0.751 |
| 408 | 0.667 | 0.892 | 0.779 | 0.573 | 0.860 | 0.751 |
| 409 | 0.658 | 0.900 | 0.779 | 0.575 | 0.868 | 0.749 |
| 410 | 0.667 | 0.900 | 0.783 | 0.583 | 0.870 | 0.755 |
| 411 | 0.692 | 0.900 | 0.796 | 0.605 | 0.874 | 0.772 |
| 412 | 0.700 | 0.900 | 0.800 | 0.612 | 0.875 | 0.778 |
| 413 | 0.692 | 0.900 | 0.796 | 0.605 | 0.874 | 0.772 |
| 414 | 0.692 | 0.892 | 0.792 | 0.595 | 0.865 | 0.769 |
| 415 | 0.692 | 0.883 | 0.788 | 0.586 | 0.856 | 0.765 |
| 416 | 0.683 | 0.892 | 0.788 | 0.588 | 0.863 | 0.763 |
| 417 | 0.683 | 0.883 | 0.783 | 0.578 | 0.854 | 0.759 |
| 418 | 0.675 | 0.892 | 0.783 | 0.580 | 0.862 | 0.757 |
| 419 | 0.658 | 0.883 | 0.771 | 0.556 | 0.849 | 0.742 |
| 420 | 0.667 | 0.900 | 0.783 | 0.583 | 0.870 | 0.755 |
| 421 | 0.667 | 0.900 | 0.783 | 0.583 | 0.870 | 0.755 |
| 422 | 0.667 | 0.900 | 0.783 | 0.583 | 0.870 | 0.755 |
| 423 | 0.642 | 0.900 | 0.771 | 0.561 | 0.865 | 0.737 |
| 424 | 0.658 | 0.883 | 0.771 | 0.556 | 0.849 | 0.742 |
| 425 | 0.650 | 0.883 | 0.767 | 0.548 | 0.848 | 0.736 |
| 426 | 0.658 | 0.883 | 0.771 | 0.556 | 0.849 | 0.742 |
| 427 | 0.658 | 0.883 | 0.771 | 0.556 | 0.849 | 0.742 |
| 428 | 0.658 | 0.883 | 0.771 | 0.556 | 0.849 | 0.742 |
| 429 | 0.658 | 0.883 | 0.771 | 0.556 | 0.849 | 0.742 |
| 430 | 0.650 | 0.883 | 0.767 | 0.548 | 0.848 | 0.736 |
| 431 | 0.650 | 0.892 | 0.771 | 0.558 | 0.857 | 0.739 |
| 432 | 0.650 | 0.892 | 0.771 | 0.558 | 0.857 | 0.739 |
| 433 | 0.650 | 0.892 | 0.771 | 0.558 | 0.857 | 0.739 |
| 434 | 0.650 | 0.883 | 0.767 | 0.548 | 0.848 | 0.736 |
| 435 | 0.650 | 0.883 | 0.767 | 0.548 | 0.848 | 0.736 |
| 436 | 0.650 | 0.883 | 0.767 | 0.548 | 0.848 | 0.736 |
| 437 | 0.658 | 0.883 | 0.771 | 0.556 | 0.849 | 0.742 |
| 438 | 0.658 | 0.883 | 0.771 | 0.556 | 0.849 | 0.742 |
| 439 | 0.650 | 0.883 | 0.767 | 0.548 | 0.848 | 0.736 |
| 440 | 0.650 | 0.883 | 0.767 | 0.548 | 0.848 | 0.736 |
| 441 | 0.642 | 0.883 | 0.763 | 0.541 | 0.846 | 0.730 |
| 442 | 0.658 | 0.892 | 0.775 | 0.566 | 0.859 | 0.745 |
| 443 | 0.650 | 0.892 | 0.771 | 0.558 | 0.857 | 0.739 |

|     |       |       |       |       |       |       |
|-----|-------|-------|-------|-------|-------|-------|
| 444 | 0.650 | 0.892 | 0.771 | 0.558 | 0.857 | 0.739 |
| 445 | 0.650 | 0.892 | 0.771 | 0.558 | 0.857 | 0.739 |
| 446 | 0.650 | 0.883 | 0.767 | 0.548 | 0.848 | 0.736 |
| 447 | 0.650 | 0.883 | 0.767 | 0.548 | 0.848 | 0.736 |
| 448 | 0.650 | 0.883 | 0.767 | 0.548 | 0.848 | 0.736 |
| 449 | 0.650 | 0.883 | 0.767 | 0.548 | 0.848 | 0.736 |
| 450 | 0.633 | 0.908 | 0.771 | 0.563 | 0.874 | 0.734 |
| 451 | 0.642 | 0.908 | 0.775 | 0.571 | 0.875 | 0.740 |
| 452 | 0.642 | 0.908 | 0.775 | 0.571 | 0.875 | 0.740 |
| 453 | 0.650 | 0.908 | 0.779 | 0.578 | 0.876 | 0.746 |
| 454 | 0.642 | 0.908 | 0.775 | 0.571 | 0.875 | 0.740 |
| 455 | 0.642 | 0.908 | 0.775 | 0.571 | 0.875 | 0.740 |
| 456 | 0.633 | 0.900 | 0.767 | 0.553 | 0.864 | 0.731 |
| 457 | 0.633 | 0.900 | 0.767 | 0.553 | 0.864 | 0.731 |
| 458 | 0.625 | 0.900 | 0.763 | 0.546 | 0.862 | 0.725 |
| 459 | 0.625 | 0.900 | 0.763 | 0.546 | 0.862 | 0.725 |
| 460 | 0.625 | 0.900 | 0.763 | 0.546 | 0.862 | 0.725 |
| 461 | 0.625 | 0.900 | 0.763 | 0.546 | 0.862 | 0.725 |
| 462 | 0.625 | 0.908 | 0.767 | 0.556 | 0.872 | 0.728 |
| 463 | 0.625 | 0.908 | 0.767 | 0.556 | 0.872 | 0.728 |
| 464 | 0.633 | 0.908 | 0.771 | 0.563 | 0.874 | 0.734 |
| 465 | 0.625 | 0.917 | 0.771 | 0.566 | 0.882 | 0.732 |
| 466 | 0.633 | 0.917 | 0.775 | 0.574 | 0.884 | 0.738 |
| 467 | 0.633 | 0.925 | 0.779 | 0.584 | 0.894 | 0.741 |
| 468 | 0.650 | 0.925 | 0.788 | 0.598 | 0.897 | 0.754 |
| 469 | 0.625 | 0.925 | 0.775 | 0.577 | 0.893 | 0.735 |
| 470 | 0.633 | 0.917 | 0.775 | 0.574 | 0.884 | 0.738 |
| 471 | 0.642 | 0.917 | 0.779 | 0.581 | 0.885 | 0.744 |
| 472 | 0.633 | 0.925 | 0.779 | 0.584 | 0.894 | 0.741 |
| 473 | 0.633 | 0.925 | 0.779 | 0.584 | 0.894 | 0.741 |
| 474 | 0.642 | 0.908 | 0.775 | 0.571 | 0.875 | 0.740 |
| 475 | 0.642 | 0.908 | 0.775 | 0.571 | 0.875 | 0.740 |
| 476 | 0.642 | 0.900 | 0.771 | 0.561 | 0.865 | 0.737 |
| 477 | 0.642 | 0.900 | 0.771 | 0.561 | 0.865 | 0.737 |
| 478 | 0.642 | 0.908 | 0.775 | 0.571 | 0.875 | 0.740 |
| 479 | 0.642 | 0.908 | 0.775 | 0.571 | 0.875 | 0.740 |
| 480 | 0.642 | 0.917 | 0.779 | 0.581 | 0.885 | 0.744 |
| 481 | 0.642 | 0.917 | 0.779 | 0.581 | 0.885 | 0.744 |
| 482 | 0.642 | 0.908 | 0.775 | 0.571 | 0.875 | 0.740 |
| 483 | 0.642 | 0.917 | 0.779 | 0.581 | 0.885 | 0.744 |
| 484 | 0.642 | 0.917 | 0.779 | 0.581 | 0.885 | 0.744 |
| 485 | 0.642 | 0.917 | 0.779 | 0.581 | 0.885 | 0.744 |

|     |       |       |       |       |       |       |
|-----|-------|-------|-------|-------|-------|-------|
| 486 | 0.650 | 0.908 | 0.779 | 0.578 | 0.876 | 0.746 |
| 487 | 0.642 | 0.908 | 0.775 | 0.571 | 0.875 | 0.740 |
| 488 | 0.658 | 0.908 | 0.783 | 0.585 | 0.878 | 0.752 |
| 489 | 0.658 | 0.908 | 0.783 | 0.585 | 0.878 | 0.752 |
| 490 | 0.658 | 0.908 | 0.783 | 0.585 | 0.878 | 0.752 |
| 491 | 0.642 | 0.908 | 0.775 | 0.571 | 0.875 | 0.740 |
| 492 | 0.667 | 0.908 | 0.788 | 0.593 | 0.879 | 0.758 |
| 493 | 0.667 | 0.908 | 0.788 | 0.593 | 0.879 | 0.758 |
| 494 | 0.658 | 0.908 | 0.783 | 0.585 | 0.878 | 0.752 |
| 495 | 0.658 | 0.908 | 0.783 | 0.585 | 0.878 | 0.752 |
| 496 | 0.658 | 0.908 | 0.783 | 0.585 | 0.878 | 0.752 |
| 497 | 0.658 | 0.908 | 0.783 | 0.585 | 0.878 | 0.752 |
| 498 | 0.658 | 0.908 | 0.783 | 0.585 | 0.878 | 0.752 |
| 499 | 0.642 | 0.908 | 0.775 | 0.571 | 0.875 | 0.740 |
| 500 | 0.658 | 0.900 | 0.779 | 0.575 | 0.868 | 0.749 |
| 501 | 0.658 | 0.908 | 0.783 | 0.585 | 0.878 | 0.752 |
| 502 | 0.650 | 0.900 | 0.775 | 0.568 | 0.867 | 0.743 |
| 503 | 0.642 | 0.900 | 0.771 | 0.561 | 0.865 | 0.737 |
| 504 | 0.642 | 0.900 | 0.771 | 0.561 | 0.865 | 0.737 |
| 505 | 0.625 | 0.908 | 0.767 | 0.556 | 0.872 | 0.728 |
| 506 | 0.625 | 0.900 | 0.763 | 0.546 | 0.862 | 0.725 |
| 507 | 0.633 | 0.917 | 0.775 | 0.574 | 0.884 | 0.738 |
| 508 | 0.625 | 0.917 | 0.771 | 0.566 | 0.882 | 0.732 |
| 509 | 0.633 | 0.917 | 0.775 | 0.574 | 0.884 | 0.738 |
| 510 | 0.633 | 0.917 | 0.775 | 0.574 | 0.884 | 0.738 |
| 511 | 0.642 | 0.917 | 0.779 | 0.581 | 0.885 | 0.744 |
| 512 | 0.642 | 0.900 | 0.771 | 0.561 | 0.865 | 0.737 |
| 513 | 0.642 | 0.892 | 0.767 | 0.551 | 0.856 | 0.733 |
| 514 | 0.625 | 0.900 | 0.763 | 0.546 | 0.862 | 0.725 |
| 515 | 0.617 | 0.908 | 0.763 | 0.549 | 0.871 | 0.722 |
| 516 | 0.617 | 0.908 | 0.763 | 0.549 | 0.871 | 0.722 |
| 517 | 0.617 | 0.908 | 0.763 | 0.549 | 0.871 | 0.722 |
| 518 | 0.617 | 0.900 | 0.758 | 0.539 | 0.860 | 0.718 |
| 519 | 0.625 | 0.892 | 0.758 | 0.536 | 0.852 | 0.721 |
| 520 | 0.642 | 0.900 | 0.771 | 0.561 | 0.865 | 0.737 |
| 521 | 0.633 | 0.900 | 0.767 | 0.553 | 0.864 | 0.731 |
| 522 | 0.658 | 0.900 | 0.779 | 0.575 | 0.868 | 0.749 |
| 523 | 0.658 | 0.875 | 0.767 | 0.546 | 0.840 | 0.738 |
| 524 | 0.650 | 0.883 | 0.767 | 0.548 | 0.848 | 0.736 |
| 525 | 0.658 | 0.883 | 0.771 | 0.556 | 0.849 | 0.742 |
| 526 | 0.642 | 0.883 | 0.763 | 0.541 | 0.846 | 0.730 |
| 527 | 0.642 | 0.875 | 0.758 | 0.531 | 0.837 | 0.726 |

|     |       |       |       |       |       |       |
|-----|-------|-------|-------|-------|-------|-------|
| 528 | 0.642 | 0.875 | 0.758 | 0.531 | 0.837 | 0.726 |
| 529 | 0.642 | 0.875 | 0.758 | 0.531 | 0.837 | 0.726 |
| 530 | 0.658 | 0.883 | 0.771 | 0.556 | 0.849 | 0.742 |
| 531 | 0.658 | 0.883 | 0.771 | 0.556 | 0.849 | 0.742 |
| 532 | 0.658 | 0.892 | 0.775 | 0.566 | 0.859 | 0.745 |
| 533 | 0.658 | 0.908 | 0.783 | 0.585 | 0.878 | 0.752 |
| 534 | 0.642 | 0.883 | 0.763 | 0.541 | 0.846 | 0.730 |
| 535 | 0.650 | 0.892 | 0.771 | 0.558 | 0.857 | 0.739 |
| 536 | 0.658 | 0.892 | 0.775 | 0.566 | 0.859 | 0.745 |
| 537 | 0.650 | 0.892 | 0.771 | 0.558 | 0.857 | 0.739 |
| 538 | 0.650 | 0.892 | 0.771 | 0.558 | 0.857 | 0.739 |
| 539 | 0.633 | 0.883 | 0.758 | 0.534 | 0.844 | 0.724 |
| 540 | 0.658 | 0.892 | 0.775 | 0.566 | 0.859 | 0.745 |
| 541 | 0.658 | 0.892 | 0.775 | 0.566 | 0.859 | 0.745 |
| 542 | 0.658 | 0.892 | 0.775 | 0.566 | 0.859 | 0.745 |
| 543 | 0.658 | 0.900 | 0.779 | 0.575 | 0.868 | 0.749 |
| 544 | 0.658 | 0.908 | 0.783 | 0.585 | 0.878 | 0.752 |
| 545 | 0.658 | 0.900 | 0.779 | 0.575 | 0.868 | 0.749 |
| 546 | 0.667 | 0.900 | 0.783 | 0.583 | 0.870 | 0.755 |
| 547 | 0.667 | 0.892 | 0.779 | 0.573 | 0.860 | 0.751 |
| 548 | 0.667 | 0.883 | 0.775 | 0.563 | 0.851 | 0.748 |
| 549 | 0.675 | 0.900 | 0.788 | 0.590 | 0.871 | 0.761 |
| 550 | 0.667 | 0.908 | 0.788 | 0.593 | 0.879 | 0.758 |
| 551 | 0.667 | 0.900 | 0.783 | 0.583 | 0.870 | 0.755 |
| 552 | 0.667 | 0.892 | 0.779 | 0.573 | 0.860 | 0.751 |
| 553 | 0.667 | 0.892 | 0.779 | 0.573 | 0.860 | 0.751 |
| 554 | 0.658 | 0.900 | 0.779 | 0.575 | 0.868 | 0.749 |
| 555 | 0.658 | 0.892 | 0.775 | 0.566 | 0.859 | 0.745 |
| 556 | 0.650 | 0.892 | 0.771 | 0.558 | 0.857 | 0.739 |
| 557 | 0.650 | 0.900 | 0.775 | 0.568 | 0.867 | 0.743 |
| 558 | 0.642 | 0.892 | 0.767 | 0.551 | 0.856 | 0.733 |
| 559 | 0.650 | 0.892 | 0.771 | 0.558 | 0.857 | 0.739 |
| 560 | 0.650 | 0.900 | 0.775 | 0.568 | 0.867 | 0.743 |
| 561 | 0.650 | 0.908 | 0.779 | 0.578 | 0.876 | 0.746 |
| 562 | 0.650 | 0.908 | 0.779 | 0.578 | 0.876 | 0.746 |
| 563 | 0.658 | 0.900 | 0.779 | 0.575 | 0.868 | 0.749 |
| 564 | 0.650 | 0.892 | 0.771 | 0.558 | 0.857 | 0.739 |
| 565 | 0.658 | 0.892 | 0.775 | 0.566 | 0.859 | 0.745 |
| 566 | 0.658 | 0.883 | 0.771 | 0.556 | 0.849 | 0.742 |
| 567 | 0.658 | 0.883 | 0.771 | 0.556 | 0.849 | 0.742 |
| 568 | 0.658 | 0.883 | 0.771 | 0.556 | 0.849 | 0.742 |
| 569 | 0.650 | 0.892 | 0.771 | 0.558 | 0.857 | 0.739 |

|     |       |       |       |       |       |       |
|-----|-------|-------|-------|-------|-------|-------|
| 570 | 0.658 | 0.892 | 0.775 | 0.566 | 0.859 | 0.745 |
| 571 | 0.650 | 0.892 | 0.771 | 0.558 | 0.857 | 0.739 |
| 572 | 0.667 | 0.892 | 0.779 | 0.573 | 0.860 | 0.751 |
| 573 | 0.658 | 0.892 | 0.775 | 0.566 | 0.859 | 0.745 |
| 574 | 0.667 | 0.892 | 0.779 | 0.573 | 0.860 | 0.751 |
| 575 | 0.658 | 0.900 | 0.779 | 0.575 | 0.868 | 0.749 |
| 576 | 0.658 | 0.900 | 0.779 | 0.575 | 0.868 | 0.749 |
| 577 | 0.667 | 0.900 | 0.783 | 0.583 | 0.870 | 0.755 |
| 578 | 0.667 | 0.900 | 0.783 | 0.583 | 0.870 | 0.755 |
| 579 | 0.667 | 0.900 | 0.783 | 0.583 | 0.870 | 0.755 |
| 580 | 0.650 | 0.908 | 0.779 | 0.578 | 0.876 | 0.746 |
| 581 | 0.658 | 0.900 | 0.779 | 0.575 | 0.868 | 0.749 |
| 582 | 0.650 | 0.900 | 0.775 | 0.568 | 0.867 | 0.743 |
| 583 | 0.650 | 0.900 | 0.775 | 0.568 | 0.867 | 0.743 |
| 584 | 0.650 | 0.900 | 0.775 | 0.568 | 0.867 | 0.743 |
| 585 | 0.650 | 0.900 | 0.775 | 0.568 | 0.867 | 0.743 |
| 586 | 0.658 | 0.900 | 0.779 | 0.575 | 0.868 | 0.749 |
| 587 | 0.650 | 0.900 | 0.775 | 0.568 | 0.867 | 0.743 |
| 588 | 0.650 | 0.892 | 0.771 | 0.558 | 0.857 | 0.739 |
| 589 | 0.642 | 0.892 | 0.767 | 0.551 | 0.856 | 0.733 |
| 590 | 0.633 | 0.883 | 0.758 | 0.534 | 0.844 | 0.724 |
| 591 | 0.633 | 0.883 | 0.758 | 0.534 | 0.844 | 0.724 |
| 592 | 0.642 | 0.892 | 0.767 | 0.551 | 0.856 | 0.733 |
| 593 | 0.650 | 0.892 | 0.771 | 0.558 | 0.857 | 0.739 |
| 594 | 0.650 | 0.892 | 0.771 | 0.558 | 0.857 | 0.739 |
| 595 | 0.650 | 0.900 | 0.775 | 0.568 | 0.867 | 0.743 |
| 596 | 0.650 | 0.900 | 0.775 | 0.568 | 0.867 | 0.743 |
| 597 | 0.650 | 0.900 | 0.775 | 0.568 | 0.867 | 0.743 |
| 598 | 0.650 | 0.908 | 0.779 | 0.578 | 0.876 | 0.746 |
| 599 | 0.650 | 0.908 | 0.779 | 0.578 | 0.876 | 0.746 |
| 600 | 0.642 | 0.900 | 0.771 | 0.561 | 0.865 | 0.737 |
| 601 | 0.642 | 0.892 | 0.767 | 0.551 | 0.856 | 0.733 |
| 602 | 0.650 | 0.900 | 0.775 | 0.568 | 0.867 | 0.743 |
| 603 | 0.642 | 0.900 | 0.771 | 0.561 | 0.865 | 0.737 |
| 604 | 0.617 | 0.883 | 0.750 | 0.519 | 0.841 | 0.712 |
| 605 | 0.617 | 0.883 | 0.750 | 0.519 | 0.841 | 0.712 |
| 606 | 0.625 | 0.883 | 0.754 | 0.526 | 0.843 | 0.718 |
| 607 | 0.625 | 0.883 | 0.754 | 0.526 | 0.843 | 0.718 |
| 608 | 0.633 | 0.883 | 0.758 | 0.534 | 0.844 | 0.724 |
| 609 | 0.642 | 0.875 | 0.758 | 0.531 | 0.837 | 0.726 |
| 610 | 0.650 | 0.883 | 0.767 | 0.548 | 0.848 | 0.736 |
| 611 | 0.633 | 0.883 | 0.758 | 0.534 | 0.844 | 0.724 |

|     |       |       |       |       |       |       |
|-----|-------|-------|-------|-------|-------|-------|
| 612 | 0.633 | 0.892 | 0.763 | 0.543 | 0.854 | 0.727 |
| 613 | 0.650 | 0.883 | 0.767 | 0.548 | 0.848 | 0.736 |
| 614 | 0.642 | 0.875 | 0.758 | 0.531 | 0.837 | 0.726 |
| 615 | 0.642 | 0.875 | 0.758 | 0.531 | 0.837 | 0.726 |
| 616 | 0.642 | 0.875 | 0.758 | 0.531 | 0.837 | 0.726 |
| 617 | 0.642 | 0.875 | 0.758 | 0.531 | 0.837 | 0.726 |
| 618 | 0.667 | 0.875 | 0.771 | 0.554 | 0.842 | 0.744 |
| 619 | 0.667 | 0.875 | 0.771 | 0.554 | 0.842 | 0.744 |
| 620 | 0.675 | 0.883 | 0.779 | 0.571 | 0.853 | 0.753 |
| 621 | 0.667 | 0.875 | 0.771 | 0.554 | 0.842 | 0.744 |
| 622 | 0.658 | 0.867 | 0.763 | 0.537 | 0.832 | 0.735 |
| 623 | 0.667 | 0.892 | 0.779 | 0.573 | 0.860 | 0.751 |
| 624 | 0.667 | 0.892 | 0.779 | 0.573 | 0.860 | 0.751 |
| 625 | 0.667 | 0.892 | 0.779 | 0.573 | 0.860 | 0.751 |
| 626 | 0.650 | 0.892 | 0.771 | 0.558 | 0.857 | 0.739 |
| 627 | 0.650 | 0.900 | 0.775 | 0.568 | 0.867 | 0.743 |
| 628 | 0.667 | 0.917 | 0.792 | 0.602 | 0.889 | 0.762 |
| 629 | 0.658 | 0.900 | 0.779 | 0.575 | 0.868 | 0.749 |
| 630 | 0.658 | 0.908 | 0.783 | 0.585 | 0.878 | 0.752 |
| 631 | 0.667 | 0.900 | 0.783 | 0.583 | 0.870 | 0.755 |
| 632 | 0.658 | 0.892 | 0.775 | 0.566 | 0.859 | 0.745 |
| 633 | 0.667 | 0.892 | 0.779 | 0.573 | 0.860 | 0.751 |
| 634 | 0.667 | 0.883 | 0.775 | 0.563 | 0.851 | 0.748 |
| 635 | 0.658 | 0.892 | 0.775 | 0.566 | 0.859 | 0.745 |
| 636 | 0.658 | 0.875 | 0.767 | 0.546 | 0.840 | 0.738 |
| 637 | 0.667 | 0.883 | 0.775 | 0.563 | 0.851 | 0.748 |
| 638 | 0.667 | 0.875 | 0.771 | 0.554 | 0.842 | 0.744 |
| 639 | 0.667 | 0.875 | 0.771 | 0.554 | 0.842 | 0.744 |
| 640 | 0.658 | 0.867 | 0.763 | 0.537 | 0.832 | 0.735 |
| 641 | 0.650 | 0.867 | 0.758 | 0.529 | 0.830 | 0.729 |
| 642 | 0.650 | 0.867 | 0.758 | 0.529 | 0.830 | 0.729 |
| 643 | 0.658 | 0.867 | 0.763 | 0.537 | 0.832 | 0.735 |
| 644 | 0.658 | 0.867 | 0.763 | 0.537 | 0.832 | 0.735 |
| 645 | 0.667 | 0.858 | 0.763 | 0.535 | 0.825 | 0.737 |
| 646 | 0.667 | 0.867 | 0.767 | 0.544 | 0.833 | 0.741 |
| 647 | 0.667 | 0.867 | 0.767 | 0.544 | 0.833 | 0.741 |
| 648 | 0.658 | 0.867 | 0.763 | 0.537 | 0.832 | 0.735 |
| 649 | 0.658 | 0.875 | 0.767 | 0.546 | 0.840 | 0.738 |
| 650 | 0.658 | 0.867 | 0.763 | 0.537 | 0.832 | 0.735 |
| 651 | 0.658 | 0.875 | 0.767 | 0.546 | 0.840 | 0.738 |
| 652 | 0.658 | 0.875 | 0.767 | 0.546 | 0.840 | 0.738 |
| 653 | 0.658 | 0.883 | 0.771 | 0.556 | 0.849 | 0.742 |



|     |       |       |       |       |       |       |
|-----|-------|-------|-------|-------|-------|-------|
| 654 | 0.650 | 0.875 | 0.763 | 0.539 | 0.839 | 0.732 |
| 655 | 0.667 | 0.875 | 0.771 | 0.554 | 0.842 | 0.744 |
| 656 | 0.658 | 0.883 | 0.771 | 0.556 | 0.849 | 0.742 |
| 657 | 0.650 | 0.892 | 0.771 | 0.558 | 0.857 | 0.739 |
| 658 | 0.642 | 0.892 | 0.767 | 0.551 | 0.856 | 0.733 |
| 659 | 0.642 | 0.892 | 0.767 | 0.551 | 0.856 | 0.733 |
| 660 | 0.642 | 0.900 | 0.771 | 0.561 | 0.865 | 0.737 |
| 661 | 0.658 | 0.900 | 0.779 | 0.575 | 0.868 | 0.749 |
| 662 | 0.667 | 0.908 | 0.788 | 0.593 | 0.879 | 0.758 |
| 663 | 0.675 | 0.900 | 0.788 | 0.590 | 0.871 | 0.761 |
| 664 | 0.650 | 0.892 | 0.771 | 0.558 | 0.857 | 0.739 |
| 665 | 0.658 | 0.900 | 0.779 | 0.575 | 0.868 | 0.749 |
| 666 | 0.658 | 0.900 | 0.779 | 0.575 | 0.868 | 0.749 |
| 667 | 0.642 | 0.900 | 0.771 | 0.561 | 0.865 | 0.737 |
| 668 | 0.642 | 0.900 | 0.771 | 0.561 | 0.865 | 0.737 |
| 669 | 0.642 | 0.892 | 0.767 | 0.551 | 0.856 | 0.733 |
| 670 | 0.642 | 0.892 | 0.767 | 0.551 | 0.856 | 0.733 |
| 671 | 0.650 | 0.892 | 0.771 | 0.558 | 0.857 | 0.739 |
| 672 | 0.642 | 0.892 | 0.767 | 0.551 | 0.856 | 0.733 |
| 673 | 0.642 | 0.892 | 0.767 | 0.551 | 0.856 | 0.733 |
| 674 | 0.650 | 0.892 | 0.771 | 0.558 | 0.857 | 0.739 |
| 675 | 0.642 | 0.883 | 0.763 | 0.541 | 0.846 | 0.730 |
| 676 | 0.650 | 0.883 | 0.767 | 0.548 | 0.848 | 0.736 |
| 677 | 0.650 | 0.883 | 0.767 | 0.548 | 0.848 | 0.736 |
| 678 | 0.650 | 0.883 | 0.767 | 0.548 | 0.848 | 0.736 |
| 679 | 0.650 | 0.883 | 0.767 | 0.548 | 0.848 | 0.736 |
| 680 | 0.650 | 0.892 | 0.771 | 0.558 | 0.857 | 0.739 |
| 681 | 0.650 | 0.892 | 0.771 | 0.558 | 0.857 | 0.739 |
| 682 | 0.642 | 0.892 | 0.767 | 0.551 | 0.856 | 0.733 |
| 683 | 0.642 | 0.892 | 0.767 | 0.551 | 0.856 | 0.733 |
| 684 | 0.650 | 0.892 | 0.771 | 0.558 | 0.857 | 0.739 |
| 685 | 0.642 | 0.892 | 0.767 | 0.551 | 0.856 | 0.733 |
| 686 | 0.642 | 0.892 | 0.767 | 0.551 | 0.856 | 0.733 |
| 687 | 0.633 | 0.892 | 0.763 | 0.543 | 0.854 | 0.727 |
| 688 | 0.633 | 0.892 | 0.763 | 0.543 | 0.854 | 0.727 |
| 689 | 0.642 | 0.892 | 0.767 | 0.551 | 0.856 | 0.733 |
| 690 | 0.650 | 0.892 | 0.771 | 0.558 | 0.857 | 0.739 |
| 691 | 0.650 | 0.892 | 0.771 | 0.558 | 0.857 | 0.739 |
| 692 | 0.650 | 0.892 | 0.771 | 0.558 | 0.857 | 0.739 |
| 693 | 0.650 | 0.892 | 0.771 | 0.558 | 0.857 | 0.739 |
| 694 | 0.650 | 0.892 | 0.771 | 0.558 | 0.857 | 0.739 |
| 695 | 0.658 | 0.892 | 0.775 | 0.566 | 0.859 | 0.745 |

|     |       |       |       |       |       |       |
|-----|-------|-------|-------|-------|-------|-------|
| 696 | 0.658 | 0.892 | 0.775 | 0.566 | 0.859 | 0.745 |
| 697 | 0.658 | 0.900 | 0.779 | 0.575 | 0.868 | 0.749 |
| 698 | 0.667 | 0.883 | 0.775 | 0.563 | 0.851 | 0.748 |
| 699 | 0.667 | 0.892 | 0.779 | 0.573 | 0.860 | 0.751 |
| 700 | 0.658 | 0.892 | 0.775 | 0.566 | 0.859 | 0.745 |
| 701 | 0.658 | 0.892 | 0.775 | 0.566 | 0.859 | 0.745 |
| 702 | 0.667 | 0.892 | 0.779 | 0.573 | 0.860 | 0.751 |
| 703 | 0.667 | 0.892 | 0.779 | 0.573 | 0.860 | 0.751 |
| 704 | 0.658 | 0.900 | 0.779 | 0.575 | 0.868 | 0.749 |
| 705 | 0.658 | 0.892 | 0.775 | 0.566 | 0.859 | 0.745 |
| 706 | 0.650 | 0.883 | 0.767 | 0.548 | 0.848 | 0.736 |
| 707 | 0.667 | 0.883 | 0.775 | 0.563 | 0.851 | 0.748 |
| 708 | 0.667 | 0.883 | 0.775 | 0.563 | 0.851 | 0.748 |
| 709 | 0.658 | 0.883 | 0.771 | 0.556 | 0.849 | 0.742 |
| 710 | 0.658 | 0.875 | 0.767 | 0.546 | 0.840 | 0.738 |
| 711 | 0.667 | 0.883 | 0.775 | 0.563 | 0.851 | 0.748 |
| 712 | 0.667 | 0.883 | 0.775 | 0.563 | 0.851 | 0.748 |
| 713 | 0.667 | 0.875 | 0.771 | 0.554 | 0.842 | 0.744 |
| 714 | 0.667 | 0.875 | 0.771 | 0.554 | 0.842 | 0.744 |
| 715 | 0.658 | 0.892 | 0.775 | 0.566 | 0.859 | 0.745 |
| 716 | 0.667 | 0.892 | 0.779 | 0.573 | 0.860 | 0.751 |
| 717 | 0.667 | 0.892 | 0.779 | 0.573 | 0.860 | 0.751 |
| 718 | 0.650 | 0.892 | 0.771 | 0.558 | 0.857 | 0.739 |
| 719 | 0.650 | 0.883 | 0.767 | 0.548 | 0.848 | 0.736 |
| 720 | 0.658 | 0.900 | 0.779 | 0.575 | 0.868 | 0.749 |
| 721 | 0.642 | 0.892 | 0.767 | 0.551 | 0.856 | 0.733 |
| 722 | 0.650 | 0.892 | 0.771 | 0.558 | 0.857 | 0.739 |
| 723 | 0.650 | 0.892 | 0.771 | 0.558 | 0.857 | 0.739 |
| 724 | 0.650 | 0.892 | 0.771 | 0.558 | 0.857 | 0.739 |
| 725 | 0.642 | 0.883 | 0.763 | 0.541 | 0.846 | 0.730 |
| 726 | 0.642 | 0.883 | 0.763 | 0.541 | 0.846 | 0.730 |
| 727 | 0.658 | 0.883 | 0.771 | 0.556 | 0.849 | 0.742 |
| 728 | 0.667 | 0.875 | 0.771 | 0.554 | 0.842 | 0.744 |
| 729 | 0.675 | 0.867 | 0.771 | 0.552 | 0.835 | 0.747 |
| 730 | 0.667 | 0.867 | 0.767 | 0.544 | 0.833 | 0.741 |
| 731 | 0.667 | 0.875 | 0.771 | 0.554 | 0.842 | 0.744 |
| 732 | 0.667 | 0.875 | 0.771 | 0.554 | 0.842 | 0.744 |
| 733 | 0.658 | 0.875 | 0.767 | 0.546 | 0.840 | 0.738 |
| 734 | 0.667 | 0.875 | 0.771 | 0.554 | 0.842 | 0.744 |
| 735 | 0.667 | 0.875 | 0.771 | 0.554 | 0.842 | 0.744 |
| 736 | 0.667 | 0.875 | 0.771 | 0.554 | 0.842 | 0.744 |
| 737 | 0.650 | 0.875 | 0.763 | 0.539 | 0.839 | 0.732 |

|     |       |       |       |       |       |       |
|-----|-------|-------|-------|-------|-------|-------|
| 738 | 0.667 | 0.875 | 0.771 | 0.554 | 0.842 | 0.744 |
| 739 | 0.658 | 0.867 | 0.763 | 0.537 | 0.832 | 0.735 |
| 740 | 0.650 | 0.867 | 0.758 | 0.529 | 0.830 | 0.729 |
| 741 | 0.650 | 0.867 | 0.758 | 0.529 | 0.830 | 0.729 |
| 742 | 0.650 | 0.875 | 0.763 | 0.539 | 0.839 | 0.732 |
| 743 | 0.658 | 0.867 | 0.763 | 0.537 | 0.832 | 0.735 |
| 744 | 0.650 | 0.875 | 0.763 | 0.539 | 0.839 | 0.732 |
| 745 | 0.642 | 0.883 | 0.763 | 0.541 | 0.846 | 0.730 |
| 746 | 0.650 | 0.875 | 0.763 | 0.539 | 0.839 | 0.732 |
| 747 | 0.642 | 0.875 | 0.758 | 0.531 | 0.837 | 0.726 |
| 748 | 0.642 | 0.875 | 0.758 | 0.531 | 0.837 | 0.726 |
| 749 | 0.642 | 0.867 | 0.754 | 0.522 | 0.828 | 0.723 |
| 750 | 0.650 | 0.867 | 0.758 | 0.529 | 0.830 | 0.729 |
| 751 | 0.658 | 0.867 | 0.763 | 0.537 | 0.832 | 0.735 |
| 752 | 0.658 | 0.875 | 0.767 | 0.546 | 0.840 | 0.738 |
| 753 | 0.650 | 0.875 | 0.763 | 0.539 | 0.839 | 0.732 |
| 754 | 0.650 | 0.875 | 0.763 | 0.539 | 0.839 | 0.732 |
| 755 | 0.650 | 0.867 | 0.758 | 0.529 | 0.830 | 0.729 |
| 756 | 0.650 | 0.867 | 0.758 | 0.529 | 0.830 | 0.729 |
| 757 | 0.658 | 0.867 | 0.763 | 0.537 | 0.832 | 0.735 |
| 758 | 0.650 | 0.875 | 0.763 | 0.539 | 0.839 | 0.732 |
| 759 | 0.642 | 0.867 | 0.754 | 0.522 | 0.828 | 0.723 |
| 760 | 0.642 | 0.875 | 0.758 | 0.531 | 0.837 | 0.726 |
| 761 | 0.642 | 0.883 | 0.763 | 0.541 | 0.846 | 0.730 |
| 762 | 0.650 | 0.875 | 0.763 | 0.539 | 0.839 | 0.732 |
| 763 | 0.650 | 0.883 | 0.767 | 0.548 | 0.848 | 0.736 |
| 764 | 0.650 | 0.875 | 0.763 | 0.539 | 0.839 | 0.732 |
| 765 | 0.650 | 0.875 | 0.763 | 0.539 | 0.839 | 0.732 |
| 766 | 0.658 | 0.875 | 0.767 | 0.546 | 0.840 | 0.738 |
| 767 | 0.658 | 0.883 | 0.771 | 0.556 | 0.849 | 0.742 |
| 768 | 0.667 | 0.900 | 0.783 | 0.583 | 0.870 | 0.755 |
| 769 | 0.658 | 0.900 | 0.779 | 0.575 | 0.868 | 0.749 |
| 770 | 0.667 | 0.900 | 0.783 | 0.583 | 0.870 | 0.755 |
| 771 | 0.658 | 0.900 | 0.779 | 0.575 | 0.868 | 0.749 |
| 772 | 0.650 | 0.900 | 0.775 | 0.568 | 0.867 | 0.743 |
| 773 | 0.650 | 0.892 | 0.771 | 0.558 | 0.857 | 0.739 |
| 774 | 0.650 | 0.892 | 0.771 | 0.558 | 0.857 | 0.739 |
| 775 | 0.650 | 0.892 | 0.771 | 0.558 | 0.857 | 0.739 |
| 776 | 0.650 | 0.892 | 0.771 | 0.558 | 0.857 | 0.739 |
| 777 | 0.650 | 0.900 | 0.775 | 0.568 | 0.867 | 0.743 |
| 778 | 0.650 | 0.900 | 0.775 | 0.568 | 0.867 | 0.743 |
| 779 | 0.658 | 0.883 | 0.771 | 0.556 | 0.849 | 0.742 |

|     |       |       |       |       |       |       |
|-----|-------|-------|-------|-------|-------|-------|
| 780 | 0.658 | 0.892 | 0.775 | 0.566 | 0.859 | 0.745 |
| 781 | 0.658 | 0.892 | 0.775 | 0.566 | 0.859 | 0.745 |
| 782 | 0.650 | 0.892 | 0.771 | 0.558 | 0.857 | 0.739 |
| 783 | 0.650 | 0.875 | 0.763 | 0.539 | 0.839 | 0.732 |
| 784 | 0.650 | 0.875 | 0.763 | 0.539 | 0.839 | 0.732 |
| 785 | 0.658 | 0.875 | 0.767 | 0.546 | 0.840 | 0.738 |
| 786 | 0.658 | 0.883 | 0.771 | 0.556 | 0.849 | 0.742 |
| 787 | 0.658 | 0.883 | 0.771 | 0.556 | 0.849 | 0.742 |
| 788 | 0.667 | 0.875 | 0.771 | 0.554 | 0.842 | 0.744 |
| 789 | 0.667 | 0.892 | 0.779 | 0.573 | 0.860 | 0.751 |
| 790 | 0.658 | 0.892 | 0.775 | 0.566 | 0.859 | 0.745 |
| 791 | 0.667 | 0.883 | 0.775 | 0.563 | 0.851 | 0.748 |
| 792 | 0.667 | 0.875 | 0.771 | 0.554 | 0.842 | 0.744 |
| 793 | 0.667 | 0.875 | 0.771 | 0.554 | 0.842 | 0.744 |
| 794 | 0.667 | 0.875 | 0.771 | 0.554 | 0.842 | 0.744 |
| 795 | 0.667 | 0.883 | 0.775 | 0.563 | 0.851 | 0.748 |
| 796 | 0.667 | 0.883 | 0.775 | 0.563 | 0.851 | 0.748 |
| 797 | 0.667 | 0.883 | 0.775 | 0.563 | 0.851 | 0.748 |
| 798 | 0.675 | 0.883 | 0.779 | 0.571 | 0.853 | 0.753 |
| 799 | 0.675 | 0.883 | 0.779 | 0.571 | 0.853 | 0.753 |
| 800 | 0.675 | 0.883 | 0.779 | 0.571 | 0.853 | 0.753 |
| 801 | 0.675 | 0.883 | 0.779 | 0.571 | 0.853 | 0.753 |
| 802 | 0.683 | 0.883 | 0.783 | 0.578 | 0.854 | 0.759 |
| 803 | 0.692 | 0.892 | 0.792 | 0.595 | 0.865 | 0.769 |
| 804 | 0.692 | 0.892 | 0.792 | 0.595 | 0.865 | 0.769 |
| 805 | 0.700 | 0.900 | 0.800 | 0.612 | 0.875 | 0.778 |
| 806 | 0.667 | 0.900 | 0.783 | 0.583 | 0.870 | 0.755 |
| 807 | 0.683 | 0.900 | 0.792 | 0.598 | 0.872 | 0.766 |
| 808 | 0.683 | 0.900 | 0.792 | 0.598 | 0.872 | 0.766 |
| 809 | 0.675 | 0.900 | 0.788 | 0.590 | 0.871 | 0.761 |
| 810 | 0.683 | 0.900 | 0.792 | 0.598 | 0.872 | 0.766 |
| 811 | 0.675 | 0.892 | 0.783 | 0.580 | 0.862 | 0.757 |
| 812 | 0.675 | 0.892 | 0.783 | 0.580 | 0.862 | 0.757 |
| 813 | 0.683 | 0.892 | 0.788 | 0.588 | 0.863 | 0.763 |
| 814 | 0.675 | 0.883 | 0.779 | 0.571 | 0.853 | 0.753 |
| 815 | 0.675 | 0.883 | 0.779 | 0.571 | 0.853 | 0.753 |
| 816 | 0.658 | 0.883 | 0.771 | 0.556 | 0.849 | 0.742 |
| 817 | 0.658 | 0.875 | 0.767 | 0.546 | 0.840 | 0.738 |
| 818 | 0.667 | 0.875 | 0.771 | 0.554 | 0.842 | 0.744 |
| 819 | 0.667 | 0.875 | 0.771 | 0.554 | 0.842 | 0.744 |
| 820 | 0.675 | 0.875 | 0.775 | 0.561 | 0.844 | 0.750 |
| 821 | 0.658 | 0.875 | 0.767 | 0.546 | 0.840 | 0.738 |

|     |       |       |       |       |       |       |
|-----|-------|-------|-------|-------|-------|-------|
| 822 | 0.658 | 0.875 | 0.767 | 0.546 | 0.840 | 0.738 |
| 823 | 0.692 | 0.875 | 0.783 | 0.576 | 0.847 | 0.761 |
| 824 | 0.683 | 0.875 | 0.779 | 0.569 | 0.845 | 0.756 |
| 825 | 0.692 | 0.875 | 0.783 | 0.576 | 0.847 | 0.761 |
| 826 | 0.692 | 0.875 | 0.783 | 0.576 | 0.847 | 0.761 |
| 827 | 0.692 | 0.875 | 0.783 | 0.576 | 0.847 | 0.761 |
| 828 | 0.683 | 0.875 | 0.779 | 0.569 | 0.845 | 0.756 |
| 829 | 0.675 | 0.883 | 0.779 | 0.571 | 0.853 | 0.753 |
| 830 | 0.675 | 0.875 | 0.775 | 0.561 | 0.844 | 0.750 |
| 831 | 0.675 | 0.875 | 0.775 | 0.561 | 0.844 | 0.750 |
| 832 | 0.675 | 0.867 | 0.771 | 0.552 | 0.835 | 0.747 |
| 833 | 0.675 | 0.867 | 0.771 | 0.552 | 0.835 | 0.747 |
| 834 | 0.683 | 0.867 | 0.775 | 0.559 | 0.837 | 0.752 |
| 835 | 0.683 | 0.867 | 0.775 | 0.559 | 0.837 | 0.752 |
| 836 | 0.675 | 0.867 | 0.771 | 0.552 | 0.835 | 0.747 |
| 837 | 0.675 | 0.867 | 0.771 | 0.552 | 0.835 | 0.747 |
| 838 | 0.675 | 0.875 | 0.775 | 0.561 | 0.844 | 0.750 |
| 839 | 0.675 | 0.875 | 0.775 | 0.561 | 0.844 | 0.750 |
| 840 | 0.692 | 0.875 | 0.783 | 0.576 | 0.847 | 0.761 |
| 841 | 0.692 | 0.867 | 0.779 | 0.567 | 0.838 | 0.758 |
| 842 | 0.683 | 0.867 | 0.775 | 0.559 | 0.837 | 0.752 |
| 843 | 0.683 | 0.875 | 0.779 | 0.569 | 0.845 | 0.756 |
| 844 | 0.692 | 0.875 | 0.783 | 0.576 | 0.847 | 0.761 |
| 845 | 0.692 | 0.858 | 0.775 | 0.558 | 0.830 | 0.755 |
| 846 | 0.683 | 0.867 | 0.775 | 0.559 | 0.837 | 0.752 |
| 847 | 0.692 | 0.867 | 0.779 | 0.567 | 0.838 | 0.758 |
| 848 | 0.692 | 0.875 | 0.783 | 0.576 | 0.847 | 0.761 |
| 849 | 0.683 | 0.883 | 0.783 | 0.578 | 0.854 | 0.759 |
| 850 | 0.683 | 0.883 | 0.783 | 0.578 | 0.854 | 0.759 |
| 851 | 0.683 | 0.892 | 0.788 | 0.588 | 0.863 | 0.763 |
| 852 | 0.683 | 0.883 | 0.783 | 0.578 | 0.854 | 0.759 |
| 853 | 0.692 | 0.883 | 0.788 | 0.586 | 0.856 | 0.765 |
| 854 | 0.692 | 0.883 | 0.788 | 0.586 | 0.856 | 0.765 |
| 855 | 0.692 | 0.892 | 0.792 | 0.595 | 0.865 | 0.769 |
| 856 | 0.692 | 0.892 | 0.792 | 0.595 | 0.865 | 0.769 |
| 857 | 0.692 | 0.892 | 0.792 | 0.595 | 0.865 | 0.769 |
| 858 | 0.692 | 0.883 | 0.788 | 0.586 | 0.856 | 0.765 |
| 859 | 0.692 | 0.883 | 0.788 | 0.586 | 0.856 | 0.765 |
| 860 | 0.692 | 0.892 | 0.792 | 0.595 | 0.865 | 0.769 |
| 861 | 0.692 | 0.883 | 0.788 | 0.586 | 0.856 | 0.765 |
| 862 | 0.692 | 0.883 | 0.788 | 0.586 | 0.856 | 0.765 |
| 863 | 0.692 | 0.867 | 0.779 | 0.567 | 0.838 | 0.758 |

|     |       |       |       |       |       |       |
|-----|-------|-------|-------|-------|-------|-------|
| 864 | 0.708 | 0.875 | 0.792 | 0.592 | 0.850 | 0.773 |
| 865 | 0.708 | 0.892 | 0.800 | 0.610 | 0.867 | 0.780 |
| 866 | 0.700 | 0.892 | 0.796 | 0.603 | 0.866 | 0.774 |
| 867 | 0.700 | 0.883 | 0.792 | 0.593 | 0.857 | 0.771 |
| 868 | 0.700 | 0.883 | 0.792 | 0.593 | 0.857 | 0.771 |
| 869 | 0.700 | 0.875 | 0.788 | 0.584 | 0.848 | 0.767 |
| 870 | 0.700 | 0.875 | 0.788 | 0.584 | 0.848 | 0.767 |
| 871 | 0.700 | 0.875 | 0.788 | 0.584 | 0.848 | 0.767 |
| 872 | 0.692 | 0.875 | 0.783 | 0.576 | 0.847 | 0.761 |
| 873 | 0.692 | 0.867 | 0.779 | 0.567 | 0.838 | 0.758 |
| 874 | 0.692 | 0.875 | 0.783 | 0.576 | 0.847 | 0.761 |
| 875 | 0.692 | 0.875 | 0.783 | 0.576 | 0.847 | 0.761 |
| 876 | 0.692 | 0.875 | 0.783 | 0.576 | 0.847 | 0.761 |
| 877 | 0.692 | 0.883 | 0.788 | 0.586 | 0.856 | 0.765 |
| 878 | 0.692 | 0.875 | 0.783 | 0.576 | 0.847 | 0.761 |
| 879 | 0.692 | 0.875 | 0.783 | 0.576 | 0.847 | 0.761 |
| 880 | 0.692 | 0.883 | 0.788 | 0.586 | 0.856 | 0.765 |
| 881 | 0.692 | 0.875 | 0.783 | 0.576 | 0.847 | 0.761 |
| 882 | 0.692 | 0.875 | 0.783 | 0.576 | 0.847 | 0.761 |
| 883 | 0.692 | 0.883 | 0.788 | 0.586 | 0.856 | 0.765 |
| 884 | 0.692 | 0.875 | 0.783 | 0.576 | 0.847 | 0.761 |
| 885 | 0.692 | 0.883 | 0.788 | 0.586 | 0.856 | 0.765 |
| 886 | 0.675 | 0.883 | 0.779 | 0.571 | 0.853 | 0.753 |
| 887 | 0.675 | 0.875 | 0.775 | 0.561 | 0.844 | 0.750 |
| 888 | 0.675 | 0.875 | 0.775 | 0.561 | 0.844 | 0.750 |
| 889 | 0.675 | 0.883 | 0.779 | 0.571 | 0.853 | 0.753 |
| 890 | 0.675 | 0.883 | 0.779 | 0.571 | 0.853 | 0.753 |
| 891 | 0.675 | 0.883 | 0.779 | 0.571 | 0.853 | 0.753 |
| 892 | 0.667 | 0.858 | 0.763 | 0.535 | 0.825 | 0.737 |
| 893 | 0.683 | 0.850 | 0.767 | 0.541 | 0.820 | 0.745 |
| 894 | 0.675 | 0.850 | 0.763 | 0.533 | 0.818 | 0.740 |
| 895 | 0.675 | 0.875 | 0.775 | 0.561 | 0.844 | 0.750 |
| 896 | 0.667 | 0.867 | 0.767 | 0.544 | 0.833 | 0.741 |
| 897 | 0.667 | 0.867 | 0.767 | 0.544 | 0.833 | 0.741 |
| 898 | 0.675 | 0.867 | 0.771 | 0.552 | 0.835 | 0.747 |
| 899 | 0.675 | 0.858 | 0.767 | 0.543 | 0.827 | 0.743 |
| 900 | 0.675 | 0.858 | 0.767 | 0.543 | 0.827 | 0.743 |
| 901 | 0.675 | 0.867 | 0.771 | 0.552 | 0.835 | 0.747 |
| 902 | 0.683 | 0.867 | 0.775 | 0.559 | 0.837 | 0.752 |
| 903 | 0.683 | 0.867 | 0.775 | 0.559 | 0.837 | 0.752 |
| 904 | 0.675 | 0.867 | 0.771 | 0.552 | 0.835 | 0.747 |
| 905 | 0.683 | 0.858 | 0.771 | 0.550 | 0.828 | 0.749 |

|     |       |       |       |       |       |       |
|-----|-------|-------|-------|-------|-------|-------|
| 906 | 0.683 | 0.858 | 0.771 | 0.550 | 0.828 | 0.749 |
| 907 | 0.683 | 0.858 | 0.771 | 0.550 | 0.828 | 0.749 |
| 908 | 0.692 | 0.883 | 0.788 | 0.586 | 0.856 | 0.765 |
| 909 | 0.692 | 0.875 | 0.783 | 0.576 | 0.847 | 0.761 |
| 910 | 0.692 | 0.875 | 0.783 | 0.576 | 0.847 | 0.761 |
| 911 | 0.692 | 0.875 | 0.783 | 0.576 | 0.847 | 0.761 |
| 912 | 0.692 | 0.875 | 0.783 | 0.576 | 0.847 | 0.761 |
| 913 | 0.692 | 0.875 | 0.783 | 0.576 | 0.847 | 0.761 |
| 914 | 0.692 | 0.875 | 0.783 | 0.576 | 0.847 | 0.761 |
| 915 | 0.692 | 0.883 | 0.788 | 0.586 | 0.856 | 0.765 |
| 916 | 0.700 | 0.883 | 0.792 | 0.593 | 0.857 | 0.771 |
| 917 | 0.700 | 0.892 | 0.796 | 0.603 | 0.866 | 0.774 |
| 918 | 0.700 | 0.892 | 0.796 | 0.603 | 0.866 | 0.774 |
| 919 | 0.700 | 0.892 | 0.796 | 0.603 | 0.866 | 0.774 |
| 920 | 0.700 | 0.892 | 0.796 | 0.603 | 0.866 | 0.774 |
| 921 | 0.700 | 0.892 | 0.796 | 0.603 | 0.866 | 0.774 |
| 922 | 0.700 | 0.892 | 0.796 | 0.603 | 0.866 | 0.774 |
| 923 | 0.700 | 0.892 | 0.796 | 0.603 | 0.866 | 0.774 |
| 924 | 0.700 | 0.892 | 0.796 | 0.603 | 0.866 | 0.774 |
| 925 | 0.700 | 0.892 | 0.796 | 0.603 | 0.866 | 0.774 |
| 926 | 0.700 | 0.892 | 0.796 | 0.603 | 0.866 | 0.774 |
| 927 | 0.683 | 0.892 | 0.788 | 0.588 | 0.863 | 0.763 |
| 928 | 0.683 | 0.883 | 0.783 | 0.578 | 0.854 | 0.759 |
| 929 | 0.692 | 0.883 | 0.788 | 0.586 | 0.856 | 0.765 |
| 930 | 0.683 | 0.883 | 0.783 | 0.578 | 0.854 | 0.759 |
| 931 | 0.683 | 0.883 | 0.783 | 0.578 | 0.854 | 0.759 |
| 932 | 0.683 | 0.883 | 0.783 | 0.578 | 0.854 | 0.759 |
| 933 | 0.683 | 0.892 | 0.788 | 0.588 | 0.863 | 0.763 |
| 934 | 0.683 | 0.883 | 0.783 | 0.578 | 0.854 | 0.759 |
| 935 | 0.683 | 0.883 | 0.783 | 0.578 | 0.854 | 0.759 |
| 936 | 0.692 | 0.883 | 0.788 | 0.586 | 0.856 | 0.765 |
| 937 | 0.692 | 0.883 | 0.788 | 0.586 | 0.856 | 0.765 |
| 938 | 0.692 | 0.883 | 0.788 | 0.586 | 0.856 | 0.765 |
| 939 | 0.683 | 0.883 | 0.783 | 0.578 | 0.854 | 0.759 |
| 940 | 0.675 | 0.883 | 0.779 | 0.571 | 0.853 | 0.753 |
| 941 | 0.683 | 0.883 | 0.783 | 0.578 | 0.854 | 0.759 |
| 942 | 0.675 | 0.883 | 0.779 | 0.571 | 0.853 | 0.753 |
| 943 | 0.675 | 0.883 | 0.779 | 0.571 | 0.853 | 0.753 |
| 944 | 0.683 | 0.883 | 0.783 | 0.578 | 0.854 | 0.759 |
| 945 | 0.683 | 0.883 | 0.783 | 0.578 | 0.854 | 0.759 |
| 946 | 0.692 | 0.892 | 0.792 | 0.595 | 0.865 | 0.769 |
| 947 | 0.683 | 0.892 | 0.788 | 0.588 | 0.863 | 0.763 |

|     |       |       |       |       |       |       |
|-----|-------|-------|-------|-------|-------|-------|
| 948 | 0.692 | 0.892 | 0.792 | 0.595 | 0.865 | 0.769 |
| 949 | 0.692 | 0.900 | 0.796 | 0.605 | 0.874 | 0.772 |
| 950 | 0.683 | 0.892 | 0.788 | 0.588 | 0.863 | 0.763 |
| 951 | 0.683 | 0.892 | 0.788 | 0.588 | 0.863 | 0.763 |
| 952 | 0.683 | 0.892 | 0.788 | 0.588 | 0.863 | 0.763 |
| 953 | 0.675 | 0.883 | 0.779 | 0.571 | 0.853 | 0.753 |
| 954 | 0.675 | 0.883 | 0.779 | 0.571 | 0.853 | 0.753 |
| 955 | 0.675 | 0.883 | 0.779 | 0.571 | 0.853 | 0.753 |
| 956 | 0.675 | 0.883 | 0.779 | 0.571 | 0.853 | 0.753 |
| 957 | 0.675 | 0.875 | 0.775 | 0.561 | 0.844 | 0.750 |
| 958 | 0.675 | 0.875 | 0.775 | 0.561 | 0.844 | 0.750 |
| 959 | 0.675 | 0.875 | 0.775 | 0.561 | 0.844 | 0.750 |
| 960 | 0.675 | 0.875 | 0.775 | 0.561 | 0.844 | 0.750 |
| 961 | 0.675 | 0.883 | 0.779 | 0.571 | 0.853 | 0.753 |
| 962 | 0.675 | 0.875 | 0.775 | 0.561 | 0.844 | 0.750 |
| 963 | 0.675 | 0.883 | 0.779 | 0.571 | 0.853 | 0.753 |
| 964 | 0.675 | 0.858 | 0.767 | 0.543 | 0.827 | 0.743 |
| 965 | 0.675 | 0.883 | 0.779 | 0.571 | 0.853 | 0.753 |
| 966 | 0.675 | 0.867 | 0.771 | 0.552 | 0.835 | 0.747 |
| 967 | 0.667 | 0.875 | 0.771 | 0.554 | 0.842 | 0.744 |
| 968 | 0.675 | 0.900 | 0.788 | 0.590 | 0.871 | 0.761 |
| 969 | 0.667 | 0.900 | 0.783 | 0.583 | 0.870 | 0.755 |
| 970 | 0.675 | 0.900 | 0.788 | 0.590 | 0.871 | 0.761 |
| 971 | 0.675 | 0.892 | 0.783 | 0.580 | 0.862 | 0.757 |
| 972 | 0.683 | 0.892 | 0.788 | 0.588 | 0.863 | 0.763 |
| 973 | 0.675 | 0.892 | 0.783 | 0.580 | 0.862 | 0.757 |
| 974 | 0.675 | 0.875 | 0.775 | 0.561 | 0.844 | 0.750 |
| 975 | 0.683 | 0.875 | 0.779 | 0.569 | 0.845 | 0.756 |
| 976 | 0.683 | 0.883 | 0.783 | 0.578 | 0.854 | 0.759 |
| 977 | 0.667 | 0.883 | 0.775 | 0.563 | 0.851 | 0.748 |
| 978 | 0.667 | 0.883 | 0.775 | 0.563 | 0.851 | 0.748 |
| 979 | 0.675 | 0.892 | 0.783 | 0.580 | 0.862 | 0.757 |
| 980 | 0.683 | 0.892 | 0.788 | 0.588 | 0.863 | 0.763 |
| 981 | 0.683 | 0.892 | 0.788 | 0.588 | 0.863 | 0.763 |
| 982 | 0.675 | 0.892 | 0.783 | 0.580 | 0.862 | 0.757 |
| 983 | 0.692 | 0.883 | 0.788 | 0.586 | 0.856 | 0.765 |
| 984 | 0.692 | 0.883 | 0.788 | 0.586 | 0.856 | 0.765 |
| 985 | 0.683 | 0.883 | 0.783 | 0.578 | 0.854 | 0.759 |
| 986 | 0.675 | 0.883 | 0.779 | 0.571 | 0.853 | 0.753 |
| 987 | 0.675 | 0.900 | 0.788 | 0.590 | 0.871 | 0.761 |
| 988 | 0.683 | 0.892 | 0.788 | 0.588 | 0.863 | 0.763 |
| 989 | 0.675 | 0.883 | 0.779 | 0.571 | 0.853 | 0.753 |



|      |       |       |       |       |       |       |
|------|-------|-------|-------|-------|-------|-------|
| 990  | 0.675 | 0.900 | 0.788 | 0.590 | 0.871 | 0.761 |
| 991  | 0.683 | 0.900 | 0.792 | 0.598 | 0.872 | 0.766 |
| 992  | 0.683 | 0.892 | 0.788 | 0.588 | 0.863 | 0.763 |
| 993  | 0.675 | 0.900 | 0.788 | 0.590 | 0.871 | 0.761 |
| 994  | 0.683 | 0.900 | 0.792 | 0.598 | 0.872 | 0.766 |
| 995  | 0.692 | 0.900 | 0.796 | 0.605 | 0.874 | 0.772 |
| 996  | 0.692 | 0.900 | 0.796 | 0.605 | 0.874 | 0.772 |
| 997  | 0.692 | 0.892 | 0.792 | 0.595 | 0.865 | 0.769 |
| 998  | 0.692 | 0.883 | 0.788 | 0.586 | 0.856 | 0.765 |
| 999  | 0.675 | 0.875 | 0.775 | 0.561 | 0.844 | 0.750 |
| 1000 | 0.675 | 0.883 | 0.779 | 0.571 | 0.853 | 0.753 |
| 1001 | 0.675 | 0.892 | 0.783 | 0.580 | 0.862 | 0.757 |
| 1002 | 0.675 | 0.900 | 0.788 | 0.590 | 0.871 | 0.761 |
| 1003 | 0.675 | 0.900 | 0.788 | 0.590 | 0.871 | 0.761 |
| 1004 | 0.675 | 0.892 | 0.783 | 0.580 | 0.862 | 0.757 |
| 1005 | 0.675 | 0.892 | 0.783 | 0.580 | 0.862 | 0.757 |
| 1006 | 0.675 | 0.883 | 0.779 | 0.571 | 0.853 | 0.753 |
| 1007 | 0.675 | 0.883 | 0.779 | 0.571 | 0.853 | 0.753 |
| 1008 | 0.675 | 0.892 | 0.783 | 0.580 | 0.862 | 0.757 |
| 1009 | 0.683 | 0.900 | 0.792 | 0.598 | 0.872 | 0.766 |
| 1010 | 0.683 | 0.908 | 0.796 | 0.607 | 0.882 | 0.770 |
| 1011 | 0.683 | 0.900 | 0.792 | 0.598 | 0.872 | 0.766 |
| 1012 | 0.683 | 0.900 | 0.792 | 0.598 | 0.872 | 0.766 |
| 1013 | 0.683 | 0.900 | 0.792 | 0.598 | 0.872 | 0.766 |
| 1014 | 0.683 | 0.900 | 0.792 | 0.598 | 0.872 | 0.766 |
| 1015 | 0.692 | 0.900 | 0.796 | 0.605 | 0.874 | 0.772 |
| 1016 | 0.692 | 0.900 | 0.796 | 0.605 | 0.874 | 0.772 |
| 1017 | 0.683 | 0.900 | 0.792 | 0.598 | 0.872 | 0.766 |
| 1018 | 0.683 | 0.900 | 0.792 | 0.598 | 0.872 | 0.766 |
| 1019 | 0.683 | 0.917 | 0.800 | 0.617 | 0.891 | 0.774 |
| 1020 | 0.683 | 0.908 | 0.796 | 0.607 | 0.882 | 0.770 |

### (3) Random forest

| Number of features | SN    | SP    | ACC   | MCC   | Precision | F1-measure |
|--------------------|-------|-------|-------|-------|-----------|------------|
| 1                  | 0.633 | 0.617 | 0.625 | 0.250 | 0.623     | 0.628      |
| 2                  | 0.717 | 0.667 | 0.692 | 0.384 | 0.683     | 0.699      |
| 3                  | 0.708 | 0.742 | 0.725 | 0.450 | 0.733     | 0.720      |
| 4                  | 0.758 | 0.800 | 0.779 | 0.559 | 0.791     | 0.774      |
| 5                  | 0.808 | 0.775 | 0.792 | 0.584 | 0.782     | 0.795      |
| 6                  | 0.800 | 0.792 | 0.796 | 0.592 | 0.793     | 0.797      |
| 7                  | 0.800 | 0.808 | 0.804 | 0.608 | 0.807     | 0.803      |
| 8                  | 0.817 | 0.800 | 0.808 | 0.617 | 0.803     | 0.810      |

|    |       |       |       |       |       |       |
|----|-------|-------|-------|-------|-------|-------|
| 9  | 0.817 | 0.775 | 0.796 | 0.592 | 0.784 | 0.800 |
| 10 | 0.817 | 0.808 | 0.813 | 0.625 | 0.810 | 0.813 |
| 11 | 0.833 | 0.808 | 0.821 | 0.642 | 0.813 | 0.823 |
| 12 | 0.808 | 0.808 | 0.808 | 0.617 | 0.808 | 0.808 |
| 13 | 0.833 | 0.825 | 0.829 | 0.658 | 0.826 | 0.830 |
| 14 | 0.867 | 0.817 | 0.842 | 0.684 | 0.825 | 0.846 |
| 15 | 0.825 | 0.825 | 0.825 | 0.650 | 0.825 | 0.825 |
| 16 | 0.875 | 0.808 | 0.842 | 0.685 | 0.820 | 0.847 |
| 17 | 0.842 | 0.800 | 0.821 | 0.642 | 0.808 | 0.824 |
| 18 | 0.833 | 0.792 | 0.813 | 0.626 | 0.800 | 0.816 |
| 19 | 0.825 | 0.808 | 0.817 | 0.633 | 0.811 | 0.818 |
| 20 | 0.833 | 0.842 | 0.838 | 0.675 | 0.840 | 0.837 |
| 21 | 0.825 | 0.825 | 0.825 | 0.650 | 0.825 | 0.825 |
| 22 | 0.842 | 0.800 | 0.821 | 0.642 | 0.808 | 0.824 |
| 23 | 0.825 | 0.792 | 0.808 | 0.617 | 0.798 | 0.811 |
| 24 | 0.875 | 0.842 | 0.858 | 0.717 | 0.847 | 0.861 |
| 25 | 0.883 | 0.775 | 0.829 | 0.662 | 0.797 | 0.838 |
| 26 | 0.850 | 0.833 | 0.842 | 0.683 | 0.836 | 0.843 |
| 27 | 0.867 | 0.800 | 0.833 | 0.668 | 0.813 | 0.839 |
| 28 | 0.883 | 0.783 | 0.833 | 0.670 | 0.803 | 0.841 |
| 29 | 0.867 | 0.850 | 0.858 | 0.717 | 0.852 | 0.860 |
| 30 | 0.850 | 0.800 | 0.825 | 0.651 | 0.810 | 0.829 |
| 31 | 0.867 | 0.850 | 0.858 | 0.717 | 0.852 | 0.860 |
| 32 | 0.850 | 0.817 | 0.833 | 0.667 | 0.823 | 0.836 |
| 33 | 0.833 | 0.808 | 0.821 | 0.642 | 0.813 | 0.823 |
| 34 | 0.833 | 0.808 | 0.821 | 0.642 | 0.813 | 0.823 |
| 35 | 0.833 | 0.858 | 0.846 | 0.692 | 0.855 | 0.844 |
| 36 | 0.858 | 0.808 | 0.833 | 0.668 | 0.817 | 0.837 |
| 37 | 0.825 | 0.825 | 0.825 | 0.650 | 0.825 | 0.825 |
| 38 | 0.867 | 0.867 | 0.867 | 0.733 | 0.867 | 0.867 |
| 39 | 0.858 | 0.800 | 0.829 | 0.659 | 0.811 | 0.834 |
| 40 | 0.842 | 0.817 | 0.829 | 0.659 | 0.821 | 0.831 |
| 41 | 0.875 | 0.825 | 0.850 | 0.701 | 0.833 | 0.854 |
| 42 | 0.842 | 0.825 | 0.833 | 0.667 | 0.828 | 0.835 |
| 43 | 0.858 | 0.800 | 0.829 | 0.659 | 0.811 | 0.834 |
| 44 | 0.858 | 0.825 | 0.842 | 0.684 | 0.831 | 0.844 |
| 45 | 0.867 | 0.858 | 0.863 | 0.725 | 0.860 | 0.863 |
| 46 | 0.867 | 0.842 | 0.854 | 0.709 | 0.846 | 0.856 |
| 47 | 0.867 | 0.833 | 0.850 | 0.700 | 0.839 | 0.852 |
| 48 | 0.867 | 0.808 | 0.838 | 0.676 | 0.819 | 0.842 |
| 49 | 0.875 | 0.833 | 0.854 | 0.709 | 0.840 | 0.857 |
| 50 | 0.825 | 0.858 | 0.842 | 0.684 | 0.853 | 0.839 |

|    |       |       |       |       |       |       |
|----|-------|-------|-------|-------|-------|-------|
| 51 | 0.850 | 0.842 | 0.846 | 0.692 | 0.843 | 0.846 |
| 52 | 0.817 | 0.833 | 0.825 | 0.650 | 0.831 | 0.824 |
| 53 | 0.850 | 0.808 | 0.829 | 0.659 | 0.816 | 0.833 |
| 54 | 0.833 | 0.850 | 0.842 | 0.683 | 0.847 | 0.840 |
| 55 | 0.867 | 0.850 | 0.858 | 0.717 | 0.852 | 0.860 |
| 56 | 0.875 | 0.842 | 0.858 | 0.717 | 0.847 | 0.861 |
| 57 | 0.875 | 0.842 | 0.858 | 0.717 | 0.847 | 0.861 |
| 58 | 0.867 | 0.817 | 0.842 | 0.684 | 0.825 | 0.846 |
| 59 | 0.867 | 0.833 | 0.850 | 0.700 | 0.839 | 0.852 |
| 60 | 0.858 | 0.833 | 0.846 | 0.692 | 0.837 | 0.848 |
| 61 | 0.858 | 0.833 | 0.846 | 0.692 | 0.837 | 0.848 |
| 62 | 0.817 | 0.850 | 0.833 | 0.667 | 0.845 | 0.831 |
| 63 | 0.867 | 0.825 | 0.846 | 0.692 | 0.832 | 0.849 |
| 64 | 0.875 | 0.850 | 0.863 | 0.725 | 0.854 | 0.864 |
| 65 | 0.850 | 0.833 | 0.842 | 0.683 | 0.836 | 0.843 |
| 66 | 0.850 | 0.825 | 0.838 | 0.675 | 0.829 | 0.840 |
| 67 | 0.842 | 0.825 | 0.833 | 0.667 | 0.828 | 0.835 |
| 68 | 0.875 | 0.817 | 0.846 | 0.693 | 0.827 | 0.850 |
| 69 | 0.858 | 0.808 | 0.833 | 0.668 | 0.817 | 0.837 |
| 70 | 0.850 | 0.817 | 0.833 | 0.667 | 0.823 | 0.836 |
| 71 | 0.825 | 0.842 | 0.833 | 0.667 | 0.839 | 0.832 |
| 72 | 0.858 | 0.792 | 0.825 | 0.651 | 0.805 | 0.831 |
| 73 | 0.875 | 0.792 | 0.833 | 0.669 | 0.808 | 0.840 |
| 74 | 0.842 | 0.842 | 0.842 | 0.683 | 0.842 | 0.842 |
| 75 | 0.850 | 0.817 | 0.833 | 0.667 | 0.823 | 0.836 |
| 76 | 0.850 | 0.808 | 0.829 | 0.659 | 0.816 | 0.833 |
| 77 | 0.842 | 0.842 | 0.842 | 0.683 | 0.842 | 0.842 |
| 78 | 0.867 | 0.817 | 0.842 | 0.684 | 0.825 | 0.846 |
| 79 | 0.875 | 0.817 | 0.846 | 0.693 | 0.827 | 0.850 |
| 80 | 0.875 | 0.842 | 0.858 | 0.717 | 0.847 | 0.861 |
| 81 | 0.858 | 0.808 | 0.833 | 0.668 | 0.817 | 0.837 |
| 82 | 0.833 | 0.842 | 0.838 | 0.675 | 0.840 | 0.837 |
| 83 | 0.858 | 0.817 | 0.838 | 0.676 | 0.824 | 0.841 |
| 84 | 0.833 | 0.850 | 0.842 | 0.683 | 0.847 | 0.840 |
| 85 | 0.858 | 0.800 | 0.829 | 0.659 | 0.811 | 0.834 |
| 86 | 0.858 | 0.825 | 0.842 | 0.684 | 0.831 | 0.844 |
| 87 | 0.842 | 0.825 | 0.833 | 0.667 | 0.828 | 0.835 |
| 88 | 0.858 | 0.817 | 0.838 | 0.676 | 0.824 | 0.841 |
| 89 | 0.867 | 0.817 | 0.842 | 0.684 | 0.825 | 0.846 |
| 90 | 0.833 | 0.817 | 0.825 | 0.650 | 0.820 | 0.826 |
| 91 | 0.850 | 0.833 | 0.842 | 0.683 | 0.836 | 0.843 |
| 92 | 0.850 | 0.817 | 0.833 | 0.667 | 0.823 | 0.836 |

|     |       |       |       |       |       |       |
|-----|-------|-------|-------|-------|-------|-------|
| 93  | 0.850 | 0.817 | 0.833 | 0.667 | 0.823 | 0.836 |
| 94  | 0.858 | 0.792 | 0.825 | 0.651 | 0.805 | 0.831 |
| 95  | 0.850 | 0.850 | 0.850 | 0.700 | 0.850 | 0.850 |
| 96  | 0.875 | 0.817 | 0.846 | 0.693 | 0.827 | 0.850 |
| 97  | 0.875 | 0.858 | 0.867 | 0.733 | 0.861 | 0.868 |
| 98  | 0.842 | 0.800 | 0.821 | 0.642 | 0.808 | 0.824 |
| 99  | 0.850 | 0.858 | 0.854 | 0.708 | 0.857 | 0.854 |
| 100 | 0.850 | 0.825 | 0.838 | 0.675 | 0.829 | 0.840 |
| 101 | 0.858 | 0.842 | 0.850 | 0.700 | 0.844 | 0.851 |
| 102 | 0.825 | 0.842 | 0.833 | 0.667 | 0.839 | 0.832 |
| 103 | 0.858 | 0.825 | 0.842 | 0.684 | 0.831 | 0.844 |
| 104 | 0.850 | 0.833 | 0.842 | 0.683 | 0.836 | 0.843 |
| 105 | 0.867 | 0.825 | 0.846 | 0.692 | 0.832 | 0.849 |
| 106 | 0.842 | 0.808 | 0.825 | 0.650 | 0.815 | 0.828 |
| 107 | 0.858 | 0.808 | 0.833 | 0.668 | 0.817 | 0.837 |
| 108 | 0.875 | 0.825 | 0.850 | 0.701 | 0.833 | 0.854 |
| 109 | 0.842 | 0.833 | 0.838 | 0.675 | 0.835 | 0.838 |
| 110 | 0.858 | 0.825 | 0.842 | 0.684 | 0.831 | 0.844 |
| 111 | 0.867 | 0.850 | 0.858 | 0.717 | 0.852 | 0.860 |
| 112 | 0.858 | 0.842 | 0.850 | 0.700 | 0.844 | 0.851 |
| 113 | 0.833 | 0.850 | 0.842 | 0.683 | 0.847 | 0.840 |
| 114 | 0.850 | 0.858 | 0.854 | 0.708 | 0.857 | 0.854 |
| 115 | 0.850 | 0.833 | 0.842 | 0.683 | 0.836 | 0.843 |
| 116 | 0.867 | 0.817 | 0.842 | 0.684 | 0.825 | 0.846 |
| 117 | 0.867 | 0.833 | 0.850 | 0.700 | 0.839 | 0.852 |
| 118 | 0.858 | 0.833 | 0.846 | 0.692 | 0.837 | 0.848 |
| 119 | 0.875 | 0.808 | 0.842 | 0.685 | 0.820 | 0.847 |
| 120 | 0.875 | 0.817 | 0.846 | 0.693 | 0.827 | 0.850 |
| 121 | 0.842 | 0.833 | 0.838 | 0.675 | 0.835 | 0.838 |
| 122 | 0.850 | 0.825 | 0.838 | 0.675 | 0.829 | 0.840 |
| 123 | 0.842 | 0.842 | 0.842 | 0.683 | 0.842 | 0.842 |
| 124 | 0.867 | 0.833 | 0.850 | 0.700 | 0.839 | 0.852 |
| 125 | 0.833 | 0.833 | 0.833 | 0.667 | 0.833 | 0.833 |
| 126 | 0.850 | 0.825 | 0.838 | 0.675 | 0.829 | 0.840 |
| 127 | 0.858 | 0.825 | 0.842 | 0.684 | 0.831 | 0.844 |
| 128 | 0.867 | 0.833 | 0.850 | 0.700 | 0.839 | 0.852 |
| 129 | 0.858 | 0.825 | 0.842 | 0.684 | 0.831 | 0.844 |
| 130 | 0.850 | 0.833 | 0.842 | 0.683 | 0.836 | 0.843 |
| 131 | 0.825 | 0.842 | 0.833 | 0.667 | 0.839 | 0.832 |
| 132 | 0.875 | 0.833 | 0.854 | 0.709 | 0.840 | 0.857 |
| 133 | 0.867 | 0.808 | 0.838 | 0.676 | 0.819 | 0.842 |
| 134 | 0.850 | 0.858 | 0.854 | 0.708 | 0.857 | 0.854 |

|     |       |       |       |       |       |       |
|-----|-------|-------|-------|-------|-------|-------|
| 135 | 0.858 | 0.817 | 0.838 | 0.676 | 0.824 | 0.841 |
| 136 | 0.850 | 0.817 | 0.833 | 0.667 | 0.823 | 0.836 |
| 137 | 0.883 | 0.833 | 0.858 | 0.718 | 0.841 | 0.862 |
| 138 | 0.850 | 0.850 | 0.850 | 0.700 | 0.850 | 0.850 |
| 139 | 0.892 | 0.825 | 0.858 | 0.718 | 0.836 | 0.863 |
| 140 | 0.858 | 0.817 | 0.838 | 0.676 | 0.824 | 0.841 |
| 141 | 0.842 | 0.808 | 0.825 | 0.650 | 0.815 | 0.828 |
| 142 | 0.875 | 0.825 | 0.850 | 0.701 | 0.833 | 0.854 |
| 143 | 0.867 | 0.808 | 0.838 | 0.676 | 0.819 | 0.842 |
| 144 | 0.842 | 0.842 | 0.842 | 0.683 | 0.842 | 0.842 |
| 145 | 0.850 | 0.817 | 0.833 | 0.667 | 0.823 | 0.836 |
| 146 | 0.858 | 0.842 | 0.850 | 0.700 | 0.844 | 0.851 |
| 147 | 0.842 | 0.817 | 0.829 | 0.659 | 0.821 | 0.831 |
| 148 | 0.858 | 0.825 | 0.842 | 0.684 | 0.831 | 0.844 |
| 149 | 0.850 | 0.800 | 0.825 | 0.651 | 0.810 | 0.829 |
| 150 | 0.858 | 0.808 | 0.833 | 0.668 | 0.817 | 0.837 |
| 151 | 0.858 | 0.825 | 0.842 | 0.684 | 0.831 | 0.844 |
| 152 | 0.850 | 0.850 | 0.850 | 0.700 | 0.850 | 0.850 |
| 153 | 0.867 | 0.833 | 0.850 | 0.700 | 0.839 | 0.852 |
| 154 | 0.850 | 0.808 | 0.829 | 0.659 | 0.816 | 0.833 |
| 155 | 0.892 | 0.792 | 0.842 | 0.687 | 0.811 | 0.849 |
| 156 | 0.825 | 0.808 | 0.817 | 0.633 | 0.811 | 0.818 |
| 157 | 0.858 | 0.792 | 0.825 | 0.651 | 0.805 | 0.831 |
| 158 | 0.850 | 0.808 | 0.829 | 0.659 | 0.816 | 0.833 |
| 159 | 0.850 | 0.808 | 0.829 | 0.659 | 0.816 | 0.833 |
| 160 | 0.858 | 0.808 | 0.833 | 0.668 | 0.817 | 0.837 |
| 161 | 0.875 | 0.817 | 0.846 | 0.693 | 0.827 | 0.850 |
| 162 | 0.875 | 0.833 | 0.854 | 0.709 | 0.840 | 0.857 |
| 163 | 0.850 | 0.800 | 0.825 | 0.651 | 0.810 | 0.829 |
| 164 | 0.867 | 0.833 | 0.850 | 0.700 | 0.839 | 0.852 |
| 165 | 0.850 | 0.817 | 0.833 | 0.667 | 0.823 | 0.836 |
| 166 | 0.892 | 0.825 | 0.858 | 0.718 | 0.836 | 0.863 |
| 167 | 0.850 | 0.817 | 0.833 | 0.667 | 0.823 | 0.836 |
| 168 | 0.867 | 0.817 | 0.842 | 0.684 | 0.825 | 0.846 |
| 169 | 0.858 | 0.808 | 0.833 | 0.668 | 0.817 | 0.837 |
| 170 | 0.867 | 0.833 | 0.850 | 0.700 | 0.839 | 0.852 |
| 171 | 0.875 | 0.783 | 0.829 | 0.661 | 0.802 | 0.837 |
| 172 | 0.858 | 0.833 | 0.846 | 0.692 | 0.837 | 0.848 |
| 173 | 0.858 | 0.808 | 0.833 | 0.668 | 0.817 | 0.837 |
| 174 | 0.850 | 0.842 | 0.846 | 0.692 | 0.843 | 0.846 |
| 175 | 0.842 | 0.808 | 0.825 | 0.650 | 0.815 | 0.828 |
| 176 | 0.867 | 0.825 | 0.846 | 0.692 | 0.832 | 0.849 |

|     |       |       |       |       |       |       |
|-----|-------|-------|-------|-------|-------|-------|
| 177 | 0.875 | 0.808 | 0.842 | 0.685 | 0.820 | 0.847 |
| 178 | 0.842 | 0.800 | 0.821 | 0.642 | 0.808 | 0.824 |
| 179 | 0.867 | 0.833 | 0.850 | 0.700 | 0.839 | 0.852 |
| 180 | 0.850 | 0.858 | 0.854 | 0.708 | 0.857 | 0.854 |
| 181 | 0.858 | 0.808 | 0.833 | 0.668 | 0.817 | 0.837 |
| 182 | 0.875 | 0.825 | 0.850 | 0.701 | 0.833 | 0.854 |
| 183 | 0.858 | 0.842 | 0.850 | 0.700 | 0.844 | 0.851 |
| 184 | 0.850 | 0.792 | 0.821 | 0.643 | 0.803 | 0.826 |
| 185 | 0.867 | 0.833 | 0.850 | 0.700 | 0.839 | 0.852 |
| 186 | 0.858 | 0.808 | 0.833 | 0.668 | 0.817 | 0.837 |
| 187 | 0.833 | 0.808 | 0.821 | 0.642 | 0.813 | 0.823 |
| 188 | 0.858 | 0.808 | 0.833 | 0.668 | 0.817 | 0.837 |
| 189 | 0.883 | 0.833 | 0.858 | 0.718 | 0.841 | 0.862 |
| 190 | 0.850 | 0.825 | 0.838 | 0.675 | 0.829 | 0.840 |
| 191 | 0.842 | 0.817 | 0.829 | 0.659 | 0.821 | 0.831 |
| 192 | 0.842 | 0.808 | 0.825 | 0.650 | 0.815 | 0.828 |
| 193 | 0.842 | 0.817 | 0.829 | 0.659 | 0.821 | 0.831 |
| 194 | 0.858 | 0.850 | 0.854 | 0.708 | 0.851 | 0.855 |
| 195 | 0.850 | 0.825 | 0.838 | 0.675 | 0.829 | 0.840 |
| 196 | 0.850 | 0.850 | 0.850 | 0.700 | 0.850 | 0.850 |
| 197 | 0.867 | 0.792 | 0.829 | 0.660 | 0.806 | 0.835 |
| 198 | 0.842 | 0.817 | 0.829 | 0.659 | 0.821 | 0.831 |
| 199 | 0.850 | 0.800 | 0.825 | 0.651 | 0.810 | 0.829 |
| 200 | 0.858 | 0.817 | 0.838 | 0.676 | 0.824 | 0.841 |
| 201 | 0.850 | 0.825 | 0.838 | 0.675 | 0.829 | 0.840 |
| 202 | 0.883 | 0.833 | 0.858 | 0.718 | 0.841 | 0.862 |
| 203 | 0.842 | 0.817 | 0.829 | 0.659 | 0.821 | 0.831 |
| 204 | 0.883 | 0.833 | 0.858 | 0.718 | 0.841 | 0.862 |
| 205 | 0.858 | 0.817 | 0.838 | 0.676 | 0.824 | 0.841 |
| 206 | 0.892 | 0.825 | 0.858 | 0.718 | 0.836 | 0.863 |
| 207 | 0.842 | 0.808 | 0.825 | 0.650 | 0.815 | 0.828 |
| 208 | 0.842 | 0.842 | 0.842 | 0.683 | 0.842 | 0.842 |
| 209 | 0.842 | 0.842 | 0.842 | 0.683 | 0.842 | 0.842 |
| 210 | 0.875 | 0.825 | 0.850 | 0.701 | 0.833 | 0.854 |
| 211 | 0.850 | 0.783 | 0.817 | 0.635 | 0.797 | 0.823 |
| 212 | 0.850 | 0.808 | 0.829 | 0.659 | 0.816 | 0.833 |
| 213 | 0.875 | 0.800 | 0.838 | 0.677 | 0.814 | 0.843 |
| 214 | 0.858 | 0.792 | 0.825 | 0.651 | 0.805 | 0.831 |
| 215 | 0.850 | 0.808 | 0.829 | 0.659 | 0.816 | 0.833 |
| 216 | 0.858 | 0.842 | 0.850 | 0.700 | 0.844 | 0.851 |
| 217 | 0.858 | 0.842 | 0.850 | 0.700 | 0.844 | 0.851 |
| 218 | 0.858 | 0.808 | 0.833 | 0.668 | 0.817 | 0.837 |

|     |       |       |       |       |       |       |
|-----|-------|-------|-------|-------|-------|-------|
| 219 | 0.833 | 0.800 | 0.817 | 0.634 | 0.806 | 0.820 |
| 220 | 0.842 | 0.800 | 0.821 | 0.642 | 0.808 | 0.824 |
| 221 | 0.850 | 0.808 | 0.829 | 0.659 | 0.816 | 0.833 |
| 222 | 0.842 | 0.800 | 0.821 | 0.642 | 0.808 | 0.824 |
| 223 | 0.850 | 0.783 | 0.817 | 0.635 | 0.797 | 0.823 |
| 224 | 0.842 | 0.817 | 0.829 | 0.659 | 0.821 | 0.831 |
| 225 | 0.858 | 0.825 | 0.842 | 0.684 | 0.831 | 0.844 |
| 226 | 0.850 | 0.817 | 0.833 | 0.667 | 0.823 | 0.836 |
| 227 | 0.850 | 0.842 | 0.846 | 0.692 | 0.843 | 0.846 |
| 228 | 0.858 | 0.817 | 0.838 | 0.676 | 0.824 | 0.841 |
| 229 | 0.883 | 0.842 | 0.863 | 0.726 | 0.848 | 0.865 |
| 230 | 0.858 | 0.833 | 0.846 | 0.692 | 0.837 | 0.848 |
| 231 | 0.867 | 0.800 | 0.833 | 0.668 | 0.813 | 0.839 |
| 232 | 0.858 | 0.817 | 0.838 | 0.676 | 0.824 | 0.841 |
| 233 | 0.850 | 0.825 | 0.838 | 0.675 | 0.829 | 0.840 |
| 234 | 0.858 | 0.825 | 0.842 | 0.684 | 0.831 | 0.844 |
| 235 | 0.842 | 0.833 | 0.838 | 0.675 | 0.835 | 0.838 |
| 236 | 0.825 | 0.800 | 0.813 | 0.625 | 0.805 | 0.815 |
| 237 | 0.842 | 0.833 | 0.838 | 0.675 | 0.835 | 0.838 |
| 238 | 0.825 | 0.817 | 0.821 | 0.642 | 0.818 | 0.822 |
| 239 | 0.858 | 0.817 | 0.838 | 0.676 | 0.824 | 0.841 |
| 240 | 0.867 | 0.817 | 0.842 | 0.684 | 0.825 | 0.846 |
| 241 | 0.842 | 0.808 | 0.825 | 0.650 | 0.815 | 0.828 |
| 242 | 0.842 | 0.800 | 0.821 | 0.642 | 0.808 | 0.824 |
| 243 | 0.842 | 0.842 | 0.842 | 0.683 | 0.842 | 0.842 |
| 244 | 0.867 | 0.842 | 0.854 | 0.709 | 0.846 | 0.856 |
| 245 | 0.825 | 0.833 | 0.829 | 0.658 | 0.832 | 0.828 |
| 246 | 0.842 | 0.833 | 0.838 | 0.675 | 0.835 | 0.838 |
| 247 | 0.867 | 0.842 | 0.854 | 0.709 | 0.846 | 0.856 |
| 248 | 0.867 | 0.808 | 0.838 | 0.676 | 0.819 | 0.842 |
| 249 | 0.867 | 0.817 | 0.842 | 0.684 | 0.825 | 0.846 |
| 250 | 0.842 | 0.808 | 0.825 | 0.650 | 0.815 | 0.828 |
| 251 | 0.858 | 0.792 | 0.825 | 0.651 | 0.805 | 0.831 |
| 252 | 0.875 | 0.800 | 0.838 | 0.677 | 0.814 | 0.843 |
| 253 | 0.858 | 0.825 | 0.842 | 0.684 | 0.831 | 0.844 |
| 254 | 0.833 | 0.817 | 0.825 | 0.650 | 0.820 | 0.826 |
| 255 | 0.850 | 0.825 | 0.838 | 0.675 | 0.829 | 0.840 |
| 256 | 0.858 | 0.842 | 0.850 | 0.700 | 0.844 | 0.851 |
| 257 | 0.833 | 0.825 | 0.829 | 0.658 | 0.826 | 0.830 |
| 258 | 0.817 | 0.858 | 0.838 | 0.676 | 0.852 | 0.834 |
| 259 | 0.833 | 0.792 | 0.813 | 0.626 | 0.800 | 0.816 |
| 260 | 0.850 | 0.825 | 0.838 | 0.675 | 0.829 | 0.840 |

|     |       |       |       |       |       |       |
|-----|-------|-------|-------|-------|-------|-------|
| 261 | 0.842 | 0.808 | 0.825 | 0.650 | 0.815 | 0.828 |
| 262 | 0.867 | 0.867 | 0.867 | 0.733 | 0.867 | 0.867 |
| 263 | 0.825 | 0.792 | 0.808 | 0.617 | 0.798 | 0.811 |
| 264 | 0.858 | 0.800 | 0.829 | 0.659 | 0.811 | 0.834 |
| 265 | 0.858 | 0.817 | 0.838 | 0.676 | 0.824 | 0.841 |
| 266 | 0.817 | 0.775 | 0.796 | 0.592 | 0.784 | 0.800 |
| 267 | 0.842 | 0.808 | 0.825 | 0.650 | 0.815 | 0.828 |
| 268 | 0.850 | 0.792 | 0.821 | 0.643 | 0.803 | 0.826 |
| 269 | 0.850 | 0.833 | 0.842 | 0.683 | 0.836 | 0.843 |
| 270 | 0.850 | 0.817 | 0.833 | 0.667 | 0.823 | 0.836 |
| 271 | 0.850 | 0.825 | 0.838 | 0.675 | 0.829 | 0.840 |
| 272 | 0.892 | 0.817 | 0.854 | 0.710 | 0.829 | 0.859 |
| 273 | 0.850 | 0.833 | 0.842 | 0.683 | 0.836 | 0.843 |
| 274 | 0.875 | 0.817 | 0.846 | 0.693 | 0.827 | 0.850 |
| 275 | 0.858 | 0.817 | 0.838 | 0.676 | 0.824 | 0.841 |
| 276 | 0.850 | 0.800 | 0.825 | 0.651 | 0.810 | 0.829 |
| 277 | 0.842 | 0.850 | 0.846 | 0.692 | 0.849 | 0.845 |
| 278 | 0.892 | 0.825 | 0.858 | 0.718 | 0.836 | 0.863 |
| 279 | 0.850 | 0.817 | 0.833 | 0.667 | 0.823 | 0.836 |
| 280 | 0.850 | 0.817 | 0.833 | 0.667 | 0.823 | 0.836 |
| 281 | 0.858 | 0.817 | 0.838 | 0.676 | 0.824 | 0.841 |
| 282 | 0.892 | 0.792 | 0.842 | 0.687 | 0.811 | 0.849 |
| 283 | 0.850 | 0.833 | 0.842 | 0.683 | 0.836 | 0.843 |
| 284 | 0.833 | 0.808 | 0.821 | 0.642 | 0.813 | 0.823 |
| 285 | 0.858 | 0.800 | 0.829 | 0.659 | 0.811 | 0.834 |
| 286 | 0.850 | 0.800 | 0.825 | 0.651 | 0.810 | 0.829 |
| 287 | 0.850 | 0.792 | 0.821 | 0.643 | 0.803 | 0.826 |
| 288 | 0.842 | 0.825 | 0.833 | 0.667 | 0.828 | 0.835 |
| 289 | 0.867 | 0.850 | 0.858 | 0.717 | 0.852 | 0.860 |
| 290 | 0.867 | 0.817 | 0.842 | 0.684 | 0.825 | 0.846 |
| 291 | 0.850 | 0.817 | 0.833 | 0.667 | 0.823 | 0.836 |
| 292 | 0.833 | 0.850 | 0.842 | 0.683 | 0.847 | 0.840 |
| 293 | 0.833 | 0.800 | 0.817 | 0.634 | 0.806 | 0.820 |
| 294 | 0.850 | 0.850 | 0.850 | 0.700 | 0.850 | 0.850 |
| 295 | 0.842 | 0.817 | 0.829 | 0.659 | 0.821 | 0.831 |
| 296 | 0.825 | 0.792 | 0.808 | 0.617 | 0.798 | 0.811 |
| 297 | 0.850 | 0.817 | 0.833 | 0.667 | 0.823 | 0.836 |
| 298 | 0.858 | 0.817 | 0.838 | 0.676 | 0.824 | 0.841 |
| 299 | 0.867 | 0.792 | 0.829 | 0.660 | 0.806 | 0.835 |
| 300 | 0.850 | 0.825 | 0.838 | 0.675 | 0.829 | 0.840 |
| 301 | 0.842 | 0.808 | 0.825 | 0.650 | 0.815 | 0.828 |
| 302 | 0.867 | 0.808 | 0.838 | 0.676 | 0.819 | 0.842 |



|     |       |       |       |       |       |       |
|-----|-------|-------|-------|-------|-------|-------|
| 303 | 0.842 | 0.825 | 0.833 | 0.667 | 0.828 | 0.835 |
| 304 | 0.850 | 0.842 | 0.846 | 0.692 | 0.843 | 0.846 |
| 305 | 0.833 | 0.775 | 0.804 | 0.609 | 0.787 | 0.810 |
| 306 | 0.842 | 0.783 | 0.813 | 0.626 | 0.795 | 0.818 |
| 307 | 0.842 | 0.833 | 0.838 | 0.675 | 0.835 | 0.838 |
| 308 | 0.833 | 0.783 | 0.808 | 0.617 | 0.794 | 0.813 |
| 309 | 0.808 | 0.842 | 0.825 | 0.650 | 0.836 | 0.822 |
| 310 | 0.858 | 0.808 | 0.833 | 0.668 | 0.817 | 0.837 |
| 311 | 0.833 | 0.800 | 0.817 | 0.634 | 0.806 | 0.820 |
| 312 | 0.850 | 0.833 | 0.842 | 0.683 | 0.836 | 0.843 |
| 313 | 0.850 | 0.808 | 0.829 | 0.659 | 0.816 | 0.833 |
| 314 | 0.833 | 0.817 | 0.825 | 0.650 | 0.820 | 0.826 |
| 315 | 0.858 | 0.817 | 0.838 | 0.676 | 0.824 | 0.841 |
| 316 | 0.867 | 0.808 | 0.838 | 0.676 | 0.819 | 0.842 |
| 317 | 0.883 | 0.825 | 0.854 | 0.710 | 0.835 | 0.858 |
| 318 | 0.850 | 0.825 | 0.838 | 0.675 | 0.829 | 0.840 |
| 319 | 0.833 | 0.817 | 0.825 | 0.650 | 0.820 | 0.826 |
| 320 | 0.842 | 0.833 | 0.838 | 0.675 | 0.835 | 0.838 |
| 321 | 0.842 | 0.825 | 0.833 | 0.667 | 0.828 | 0.835 |
| 322 | 0.850 | 0.825 | 0.838 | 0.675 | 0.829 | 0.840 |
| 323 | 0.875 | 0.808 | 0.842 | 0.685 | 0.820 | 0.847 |
| 324 | 0.842 | 0.800 | 0.821 | 0.642 | 0.808 | 0.824 |
| 325 | 0.858 | 0.792 | 0.825 | 0.651 | 0.805 | 0.831 |
| 326 | 0.875 | 0.775 | 0.825 | 0.653 | 0.795 | 0.833 |
| 327 | 0.850 | 0.825 | 0.838 | 0.675 | 0.829 | 0.840 |
| 328 | 0.867 | 0.850 | 0.858 | 0.717 | 0.852 | 0.860 |
| 329 | 0.858 | 0.833 | 0.846 | 0.692 | 0.837 | 0.848 |
| 330 | 0.833 | 0.792 | 0.813 | 0.626 | 0.800 | 0.816 |
| 331 | 0.842 | 0.867 | 0.854 | 0.709 | 0.863 | 0.852 |
| 332 | 0.858 | 0.842 | 0.850 | 0.700 | 0.844 | 0.851 |
| 333 | 0.875 | 0.825 | 0.850 | 0.701 | 0.833 | 0.854 |
| 334 | 0.850 | 0.800 | 0.825 | 0.651 | 0.810 | 0.829 |
| 335 | 0.892 | 0.842 | 0.867 | 0.734 | 0.849 | 0.870 |
| 336 | 0.850 | 0.808 | 0.829 | 0.659 | 0.816 | 0.833 |
| 337 | 0.842 | 0.825 | 0.833 | 0.667 | 0.828 | 0.835 |
| 338 | 0.858 | 0.825 | 0.842 | 0.684 | 0.831 | 0.844 |
| 339 | 0.817 | 0.817 | 0.817 | 0.633 | 0.817 | 0.817 |
| 340 | 0.858 | 0.808 | 0.833 | 0.668 | 0.817 | 0.837 |
| 341 | 0.867 | 0.767 | 0.817 | 0.637 | 0.788 | 0.825 |
| 342 | 0.858 | 0.792 | 0.825 | 0.651 | 0.805 | 0.831 |
| 343 | 0.867 | 0.825 | 0.846 | 0.692 | 0.832 | 0.849 |
| 344 | 0.883 | 0.792 | 0.838 | 0.678 | 0.809 | 0.845 |

|     |       |       |       |       |       |       |
|-----|-------|-------|-------|-------|-------|-------|
| 345 | 0.858 | 0.783 | 0.821 | 0.643 | 0.798 | 0.827 |
| 346 | 0.858 | 0.808 | 0.833 | 0.668 | 0.817 | 0.837 |
| 347 | 0.867 | 0.817 | 0.842 | 0.684 | 0.825 | 0.846 |
| 348 | 0.833 | 0.800 | 0.817 | 0.634 | 0.806 | 0.820 |
| 349 | 0.825 | 0.833 | 0.829 | 0.658 | 0.832 | 0.828 |
| 350 | 0.858 | 0.842 | 0.850 | 0.700 | 0.844 | 0.851 |
| 351 | 0.850 | 0.800 | 0.825 | 0.651 | 0.810 | 0.829 |
| 352 | 0.867 | 0.792 | 0.829 | 0.660 | 0.806 | 0.835 |
| 353 | 0.842 | 0.800 | 0.821 | 0.642 | 0.808 | 0.824 |
| 354 | 0.842 | 0.842 | 0.842 | 0.683 | 0.842 | 0.842 |
| 355 | 0.842 | 0.817 | 0.829 | 0.659 | 0.821 | 0.831 |
| 356 | 0.858 | 0.817 | 0.838 | 0.676 | 0.824 | 0.841 |
| 357 | 0.850 | 0.808 | 0.829 | 0.659 | 0.816 | 0.833 |
| 358 | 0.833 | 0.842 | 0.838 | 0.675 | 0.840 | 0.837 |
| 359 | 0.850 | 0.808 | 0.829 | 0.659 | 0.816 | 0.833 |
| 360 | 0.850 | 0.850 | 0.850 | 0.700 | 0.850 | 0.850 |
| 361 | 0.858 | 0.825 | 0.842 | 0.684 | 0.831 | 0.844 |
| 362 | 0.858 | 0.833 | 0.846 | 0.692 | 0.837 | 0.848 |
| 363 | 0.825 | 0.817 | 0.821 | 0.642 | 0.818 | 0.822 |
| 364 | 0.842 | 0.808 | 0.825 | 0.650 | 0.815 | 0.828 |
| 365 | 0.858 | 0.833 | 0.846 | 0.692 | 0.837 | 0.848 |
| 366 | 0.850 | 0.792 | 0.821 | 0.643 | 0.803 | 0.826 |
| 367 | 0.817 | 0.850 | 0.833 | 0.667 | 0.845 | 0.831 |
| 368 | 0.858 | 0.825 | 0.842 | 0.684 | 0.831 | 0.844 |
| 369 | 0.858 | 0.817 | 0.838 | 0.676 | 0.824 | 0.841 |
| 370 | 0.833 | 0.808 | 0.821 | 0.642 | 0.813 | 0.823 |
| 371 | 0.825 | 0.842 | 0.833 | 0.667 | 0.839 | 0.832 |
| 372 | 0.808 | 0.833 | 0.821 | 0.642 | 0.829 | 0.819 |
| 373 | 0.833 | 0.783 | 0.808 | 0.617 | 0.794 | 0.813 |
| 374 | 0.817 | 0.808 | 0.813 | 0.625 | 0.810 | 0.813 |
| 375 | 0.825 | 0.825 | 0.825 | 0.650 | 0.825 | 0.825 |
| 376 | 0.867 | 0.858 | 0.863 | 0.725 | 0.860 | 0.863 |
| 377 | 0.850 | 0.825 | 0.838 | 0.675 | 0.829 | 0.840 |
| 378 | 0.800 | 0.850 | 0.825 | 0.651 | 0.842 | 0.821 |
| 379 | 0.833 | 0.808 | 0.821 | 0.642 | 0.813 | 0.823 |
| 380 | 0.875 | 0.792 | 0.833 | 0.669 | 0.808 | 0.840 |
| 381 | 0.833 | 0.783 | 0.808 | 0.617 | 0.794 | 0.813 |
| 382 | 0.850 | 0.808 | 0.829 | 0.659 | 0.816 | 0.833 |
| 383 | 0.842 | 0.808 | 0.825 | 0.650 | 0.815 | 0.828 |
| 384 | 0.875 | 0.833 | 0.854 | 0.709 | 0.840 | 0.857 |
| 385 | 0.842 | 0.808 | 0.825 | 0.650 | 0.815 | 0.828 |
| 386 | 0.842 | 0.850 | 0.846 | 0.692 | 0.849 | 0.845 |

|     |       |       |       |       |       |       |
|-----|-------|-------|-------|-------|-------|-------|
| 387 | 0.833 | 0.833 | 0.833 | 0.667 | 0.833 | 0.833 |
| 388 | 0.833 | 0.817 | 0.825 | 0.650 | 0.820 | 0.826 |
| 389 | 0.842 | 0.808 | 0.825 | 0.650 | 0.815 | 0.828 |
| 390 | 0.833 | 0.867 | 0.850 | 0.700 | 0.862 | 0.847 |
| 391 | 0.850 | 0.833 | 0.842 | 0.683 | 0.836 | 0.843 |
| 392 | 0.842 | 0.858 | 0.850 | 0.700 | 0.856 | 0.849 |
| 393 | 0.867 | 0.800 | 0.833 | 0.668 | 0.813 | 0.839 |
| 394 | 0.817 | 0.808 | 0.813 | 0.625 | 0.810 | 0.813 |
| 395 | 0.825 | 0.825 | 0.825 | 0.650 | 0.825 | 0.825 |
| 396 | 0.858 | 0.817 | 0.838 | 0.676 | 0.824 | 0.841 |
| 397 | 0.883 | 0.800 | 0.842 | 0.686 | 0.815 | 0.848 |
| 398 | 0.883 | 0.808 | 0.846 | 0.694 | 0.822 | 0.851 |
| 399 | 0.867 | 0.808 | 0.838 | 0.676 | 0.819 | 0.842 |
| 400 | 0.858 | 0.817 | 0.838 | 0.676 | 0.824 | 0.841 |
| 401 | 0.858 | 0.792 | 0.825 | 0.651 | 0.805 | 0.831 |
| 402 | 0.842 | 0.833 | 0.838 | 0.675 | 0.835 | 0.838 |
| 403 | 0.858 | 0.808 | 0.833 | 0.668 | 0.817 | 0.837 |
| 404 | 0.875 | 0.808 | 0.842 | 0.685 | 0.820 | 0.847 |
| 405 | 0.867 | 0.808 | 0.838 | 0.676 | 0.819 | 0.842 |
| 406 | 0.875 | 0.825 | 0.850 | 0.701 | 0.833 | 0.854 |
| 407 | 0.842 | 0.792 | 0.817 | 0.634 | 0.802 | 0.821 |
| 408 | 0.850 | 0.825 | 0.838 | 0.675 | 0.829 | 0.840 |
| 409 | 0.833 | 0.825 | 0.829 | 0.658 | 0.826 | 0.830 |
| 410 | 0.858 | 0.808 | 0.833 | 0.668 | 0.817 | 0.837 |
| 411 | 0.825 | 0.817 | 0.821 | 0.642 | 0.818 | 0.822 |
| 412 | 0.867 | 0.825 | 0.846 | 0.692 | 0.832 | 0.849 |
| 413 | 0.842 | 0.842 | 0.842 | 0.683 | 0.842 | 0.842 |
| 414 | 0.842 | 0.850 | 0.846 | 0.692 | 0.849 | 0.845 |
| 415 | 0.850 | 0.825 | 0.838 | 0.675 | 0.829 | 0.840 |
| 416 | 0.858 | 0.817 | 0.838 | 0.676 | 0.824 | 0.841 |
| 417 | 0.858 | 0.800 | 0.829 | 0.659 | 0.811 | 0.834 |
| 418 | 0.883 | 0.800 | 0.842 | 0.686 | 0.815 | 0.848 |
| 419 | 0.867 | 0.842 | 0.854 | 0.709 | 0.846 | 0.856 |
| 420 | 0.858 | 0.783 | 0.821 | 0.643 | 0.798 | 0.827 |
| 421 | 0.858 | 0.808 | 0.833 | 0.668 | 0.817 | 0.837 |
| 422 | 0.867 | 0.767 | 0.817 | 0.637 | 0.788 | 0.825 |
| 423 | 0.842 | 0.808 | 0.825 | 0.650 | 0.815 | 0.828 |
| 424 | 0.842 | 0.850 | 0.846 | 0.692 | 0.849 | 0.845 |
| 425 | 0.842 | 0.825 | 0.833 | 0.667 | 0.828 | 0.835 |
| 426 | 0.850 | 0.817 | 0.833 | 0.667 | 0.823 | 0.836 |
| 427 | 0.867 | 0.842 | 0.854 | 0.709 | 0.846 | 0.856 |
| 428 | 0.867 | 0.792 | 0.829 | 0.660 | 0.806 | 0.835 |

|     |       |       |       |       |       |       |
|-----|-------|-------|-------|-------|-------|-------|
| 429 | 0.858 | 0.817 | 0.838 | 0.676 | 0.824 | 0.841 |
| 430 | 0.867 | 0.775 | 0.821 | 0.644 | 0.794 | 0.829 |
| 431 | 0.875 | 0.817 | 0.846 | 0.693 | 0.827 | 0.850 |
| 432 | 0.858 | 0.825 | 0.842 | 0.684 | 0.831 | 0.844 |
| 433 | 0.850 | 0.783 | 0.817 | 0.635 | 0.797 | 0.823 |
| 434 | 0.825 | 0.800 | 0.813 | 0.625 | 0.805 | 0.815 |
| 435 | 0.842 | 0.800 | 0.821 | 0.642 | 0.808 | 0.824 |
| 436 | 0.833 | 0.825 | 0.829 | 0.658 | 0.826 | 0.830 |
| 437 | 0.867 | 0.825 | 0.846 | 0.692 | 0.832 | 0.849 |
| 438 | 0.808 | 0.792 | 0.800 | 0.600 | 0.795 | 0.802 |
| 439 | 0.833 | 0.808 | 0.821 | 0.642 | 0.813 | 0.823 |
| 440 | 0.800 | 0.783 | 0.792 | 0.583 | 0.787 | 0.793 |
| 441 | 0.858 | 0.808 | 0.833 | 0.668 | 0.817 | 0.837 |
| 442 | 0.842 | 0.833 | 0.838 | 0.675 | 0.835 | 0.838 |
| 443 | 0.842 | 0.808 | 0.825 | 0.650 | 0.815 | 0.828 |
| 444 | 0.850 | 0.833 | 0.842 | 0.683 | 0.836 | 0.843 |
| 445 | 0.800 | 0.808 | 0.804 | 0.608 | 0.807 | 0.803 |
| 446 | 0.825 | 0.850 | 0.838 | 0.675 | 0.846 | 0.835 |
| 447 | 0.850 | 0.825 | 0.838 | 0.675 | 0.829 | 0.840 |
| 448 | 0.833 | 0.808 | 0.821 | 0.642 | 0.813 | 0.823 |
| 449 | 0.850 | 0.800 | 0.825 | 0.651 | 0.810 | 0.829 |
| 450 | 0.842 | 0.808 | 0.825 | 0.650 | 0.815 | 0.828 |
| 451 | 0.858 | 0.817 | 0.838 | 0.676 | 0.824 | 0.841 |
| 452 | 0.883 | 0.842 | 0.863 | 0.726 | 0.848 | 0.865 |
| 453 | 0.850 | 0.775 | 0.813 | 0.627 | 0.791 | 0.819 |
| 454 | 0.825 | 0.825 | 0.825 | 0.650 | 0.825 | 0.825 |
| 455 | 0.842 | 0.833 | 0.838 | 0.675 | 0.835 | 0.838 |
| 456 | 0.842 | 0.783 | 0.813 | 0.626 | 0.795 | 0.818 |
| 457 | 0.850 | 0.817 | 0.833 | 0.667 | 0.823 | 0.836 |
| 458 | 0.842 | 0.800 | 0.821 | 0.642 | 0.808 | 0.824 |
| 459 | 0.842 | 0.808 | 0.825 | 0.650 | 0.815 | 0.828 |
| 460 | 0.850 | 0.842 | 0.846 | 0.692 | 0.843 | 0.846 |
| 461 | 0.825 | 0.808 | 0.817 | 0.633 | 0.811 | 0.818 |
| 462 | 0.867 | 0.842 | 0.854 | 0.709 | 0.846 | 0.856 |
| 463 | 0.825 | 0.775 | 0.800 | 0.601 | 0.786 | 0.805 |
| 464 | 0.875 | 0.800 | 0.838 | 0.677 | 0.814 | 0.843 |
| 465 | 0.850 | 0.783 | 0.817 | 0.635 | 0.797 | 0.823 |
| 466 | 0.825 | 0.842 | 0.833 | 0.667 | 0.839 | 0.832 |
| 467 | 0.842 | 0.833 | 0.838 | 0.675 | 0.835 | 0.838 |
| 468 | 0.858 | 0.775 | 0.817 | 0.636 | 0.792 | 0.824 |
| 469 | 0.883 | 0.817 | 0.850 | 0.702 | 0.828 | 0.855 |
| 470 | 0.833 | 0.792 | 0.813 | 0.626 | 0.800 | 0.816 |

|     |       |       |       |       |       |       |
|-----|-------|-------|-------|-------|-------|-------|
| 471 | 0.858 | 0.783 | 0.821 | 0.643 | 0.798 | 0.827 |
| 472 | 0.825 | 0.817 | 0.821 | 0.642 | 0.818 | 0.822 |
| 473 | 0.858 | 0.808 | 0.833 | 0.668 | 0.817 | 0.837 |
| 474 | 0.825 | 0.842 | 0.833 | 0.667 | 0.839 | 0.832 |
| 475 | 0.817 | 0.817 | 0.817 | 0.633 | 0.817 | 0.817 |
| 476 | 0.875 | 0.842 | 0.858 | 0.717 | 0.847 | 0.861 |
| 477 | 0.817 | 0.800 | 0.808 | 0.617 | 0.803 | 0.810 |
| 478 | 0.825 | 0.800 | 0.813 | 0.625 | 0.805 | 0.815 |
| 479 | 0.833 | 0.808 | 0.821 | 0.642 | 0.813 | 0.823 |
| 480 | 0.850 | 0.825 | 0.838 | 0.675 | 0.829 | 0.840 |
| 481 | 0.858 | 0.842 | 0.850 | 0.700 | 0.844 | 0.851 |
| 482 | 0.842 | 0.825 | 0.833 | 0.667 | 0.828 | 0.835 |
| 483 | 0.842 | 0.817 | 0.829 | 0.659 | 0.821 | 0.831 |
| 484 | 0.850 | 0.783 | 0.817 | 0.635 | 0.797 | 0.823 |
| 485 | 0.867 | 0.792 | 0.829 | 0.660 | 0.806 | 0.835 |
| 486 | 0.875 | 0.800 | 0.838 | 0.677 | 0.814 | 0.843 |
| 487 | 0.842 | 0.775 | 0.808 | 0.618 | 0.789 | 0.815 |
| 488 | 0.817 | 0.858 | 0.838 | 0.676 | 0.852 | 0.834 |
| 489 | 0.833 | 0.825 | 0.829 | 0.658 | 0.826 | 0.830 |
| 490 | 0.858 | 0.808 | 0.833 | 0.668 | 0.817 | 0.837 |
| 491 | 0.842 | 0.825 | 0.833 | 0.667 | 0.828 | 0.835 |
| 492 | 0.833 | 0.825 | 0.829 | 0.658 | 0.826 | 0.830 |
| 493 | 0.850 | 0.833 | 0.842 | 0.683 | 0.836 | 0.843 |
| 494 | 0.875 | 0.825 | 0.850 | 0.701 | 0.833 | 0.854 |
| 495 | 0.867 | 0.833 | 0.850 | 0.700 | 0.839 | 0.852 |
| 496 | 0.833 | 0.808 | 0.821 | 0.642 | 0.813 | 0.823 |
| 497 | 0.850 | 0.817 | 0.833 | 0.667 | 0.823 | 0.836 |
| 498 | 0.883 | 0.817 | 0.850 | 0.702 | 0.828 | 0.855 |
| 499 | 0.842 | 0.800 | 0.821 | 0.642 | 0.808 | 0.824 |
| 500 | 0.858 | 0.842 | 0.850 | 0.700 | 0.844 | 0.851 |
| 501 | 0.850 | 0.817 | 0.833 | 0.667 | 0.823 | 0.836 |
| 502 | 0.833 | 0.833 | 0.833 | 0.667 | 0.833 | 0.833 |
| 503 | 0.833 | 0.833 | 0.833 | 0.667 | 0.833 | 0.833 |
| 504 | 0.842 | 0.808 | 0.825 | 0.650 | 0.815 | 0.828 |
| 505 | 0.850 | 0.825 | 0.838 | 0.675 | 0.829 | 0.840 |
| 506 | 0.858 | 0.800 | 0.829 | 0.659 | 0.811 | 0.834 |
| 507 | 0.833 | 0.858 | 0.846 | 0.692 | 0.855 | 0.844 |
| 508 | 0.850 | 0.825 | 0.838 | 0.675 | 0.829 | 0.840 |
| 509 | 0.825 | 0.800 | 0.813 | 0.625 | 0.805 | 0.815 |
| 510 | 0.867 | 0.792 | 0.829 | 0.660 | 0.806 | 0.835 |
| 511 | 0.833 | 0.825 | 0.829 | 0.658 | 0.826 | 0.830 |
| 512 | 0.825 | 0.808 | 0.817 | 0.633 | 0.811 | 0.818 |

|     |       |       |       |       |       |       |
|-----|-------|-------|-------|-------|-------|-------|
| 513 | 0.858 | 0.833 | 0.846 | 0.692 | 0.837 | 0.848 |
| 514 | 0.858 | 0.775 | 0.817 | 0.636 | 0.792 | 0.824 |
| 515 | 0.808 | 0.800 | 0.804 | 0.608 | 0.802 | 0.805 |
| 516 | 0.850 | 0.783 | 0.817 | 0.635 | 0.797 | 0.823 |
| 517 | 0.850 | 0.783 | 0.817 | 0.635 | 0.797 | 0.823 |
| 518 | 0.858 | 0.792 | 0.825 | 0.651 | 0.805 | 0.831 |
| 519 | 0.858 | 0.783 | 0.821 | 0.643 | 0.798 | 0.827 |
| 520 | 0.858 | 0.842 | 0.850 | 0.700 | 0.844 | 0.851 |
| 521 | 0.825 | 0.808 | 0.817 | 0.633 | 0.811 | 0.818 |
| 522 | 0.858 | 0.792 | 0.825 | 0.651 | 0.805 | 0.831 |
| 523 | 0.833 | 0.825 | 0.829 | 0.658 | 0.826 | 0.830 |
| 524 | 0.858 | 0.825 | 0.842 | 0.684 | 0.831 | 0.844 |
| 525 | 0.825 | 0.833 | 0.829 | 0.658 | 0.832 | 0.828 |
| 526 | 0.850 | 0.800 | 0.825 | 0.651 | 0.810 | 0.829 |
| 527 | 0.825 | 0.858 | 0.842 | 0.684 | 0.853 | 0.839 |
| 528 | 0.825 | 0.867 | 0.846 | 0.692 | 0.861 | 0.843 |
| 529 | 0.858 | 0.808 | 0.833 | 0.668 | 0.817 | 0.837 |
| 530 | 0.858 | 0.808 | 0.833 | 0.668 | 0.817 | 0.837 |
| 531 | 0.850 | 0.817 | 0.833 | 0.667 | 0.823 | 0.836 |
| 532 | 0.833 | 0.850 | 0.842 | 0.683 | 0.847 | 0.840 |
| 533 | 0.875 | 0.808 | 0.842 | 0.685 | 0.820 | 0.847 |
| 534 | 0.858 | 0.833 | 0.846 | 0.692 | 0.837 | 0.848 |
| 535 | 0.850 | 0.800 | 0.825 | 0.651 | 0.810 | 0.829 |
| 536 | 0.842 | 0.850 | 0.846 | 0.692 | 0.849 | 0.845 |
| 537 | 0.858 | 0.842 | 0.850 | 0.700 | 0.844 | 0.851 |
| 538 | 0.858 | 0.833 | 0.846 | 0.692 | 0.837 | 0.848 |
| 539 | 0.833 | 0.817 | 0.825 | 0.650 | 0.820 | 0.826 |
| 540 | 0.808 | 0.833 | 0.821 | 0.642 | 0.829 | 0.819 |
| 541 | 0.850 | 0.833 | 0.842 | 0.683 | 0.836 | 0.843 |
| 542 | 0.833 | 0.808 | 0.821 | 0.642 | 0.813 | 0.823 |
| 543 | 0.875 | 0.867 | 0.871 | 0.742 | 0.868 | 0.871 |
| 544 | 0.833 | 0.775 | 0.804 | 0.609 | 0.787 | 0.810 |
| 545 | 0.825 | 0.808 | 0.817 | 0.633 | 0.811 | 0.818 |
| 546 | 0.842 | 0.792 | 0.817 | 0.634 | 0.802 | 0.821 |
| 547 | 0.842 | 0.808 | 0.825 | 0.650 | 0.815 | 0.828 |
| 548 | 0.833 | 0.808 | 0.821 | 0.642 | 0.813 | 0.823 |
| 549 | 0.833 | 0.800 | 0.817 | 0.634 | 0.806 | 0.820 |
| 550 | 0.850 | 0.817 | 0.833 | 0.667 | 0.823 | 0.836 |
| 551 | 0.867 | 0.808 | 0.838 | 0.676 | 0.819 | 0.842 |
| 552 | 0.858 | 0.808 | 0.833 | 0.668 | 0.817 | 0.837 |
| 553 | 0.842 | 0.800 | 0.821 | 0.642 | 0.808 | 0.824 |
| 554 | 0.817 | 0.800 | 0.808 | 0.617 | 0.803 | 0.810 |

|     |       |       |       |       |       |       |
|-----|-------|-------|-------|-------|-------|-------|
| 555 | 0.842 | 0.817 | 0.829 | 0.659 | 0.821 | 0.831 |
| 556 | 0.858 | 0.808 | 0.833 | 0.668 | 0.817 | 0.837 |
| 557 | 0.858 | 0.808 | 0.833 | 0.668 | 0.817 | 0.837 |
| 558 | 0.817 | 0.842 | 0.829 | 0.659 | 0.838 | 0.827 |
| 559 | 0.858 | 0.758 | 0.808 | 0.620 | 0.780 | 0.817 |
| 560 | 0.842 | 0.808 | 0.825 | 0.650 | 0.815 | 0.828 |
| 561 | 0.800 | 0.825 | 0.813 | 0.625 | 0.821 | 0.810 |
| 562 | 0.833 | 0.800 | 0.817 | 0.634 | 0.806 | 0.820 |
| 563 | 0.883 | 0.817 | 0.850 | 0.702 | 0.828 | 0.855 |
| 564 | 0.858 | 0.833 | 0.846 | 0.692 | 0.837 | 0.848 |
| 565 | 0.867 | 0.858 | 0.863 | 0.725 | 0.860 | 0.863 |
| 566 | 0.850 | 0.833 | 0.842 | 0.683 | 0.836 | 0.843 |
| 567 | 0.808 | 0.800 | 0.804 | 0.608 | 0.802 | 0.805 |
| 568 | 0.875 | 0.792 | 0.833 | 0.669 | 0.808 | 0.840 |
| 569 | 0.850 | 0.775 | 0.813 | 0.627 | 0.791 | 0.819 |
| 570 | 0.842 | 0.808 | 0.825 | 0.650 | 0.815 | 0.828 |
| 571 | 0.833 | 0.783 | 0.808 | 0.617 | 0.794 | 0.813 |
| 572 | 0.817 | 0.833 | 0.825 | 0.650 | 0.831 | 0.824 |
| 573 | 0.850 | 0.800 | 0.825 | 0.651 | 0.810 | 0.829 |
| 574 | 0.817 | 0.833 | 0.825 | 0.650 | 0.831 | 0.824 |
| 575 | 0.858 | 0.825 | 0.842 | 0.684 | 0.831 | 0.844 |
| 576 | 0.833 | 0.825 | 0.829 | 0.658 | 0.826 | 0.830 |
| 577 | 0.833 | 0.808 | 0.821 | 0.642 | 0.813 | 0.823 |
| 578 | 0.850 | 0.825 | 0.838 | 0.675 | 0.829 | 0.840 |
| 579 | 0.833 | 0.817 | 0.825 | 0.650 | 0.820 | 0.826 |
| 580 | 0.842 | 0.825 | 0.833 | 0.667 | 0.828 | 0.835 |
| 581 | 0.850 | 0.842 | 0.846 | 0.692 | 0.843 | 0.846 |
| 582 | 0.833 | 0.775 | 0.804 | 0.609 | 0.787 | 0.810 |
| 583 | 0.850 | 0.792 | 0.821 | 0.643 | 0.803 | 0.826 |
| 584 | 0.825 | 0.817 | 0.821 | 0.642 | 0.818 | 0.822 |
| 585 | 0.858 | 0.867 | 0.863 | 0.725 | 0.866 | 0.862 |
| 586 | 0.825 | 0.825 | 0.825 | 0.650 | 0.825 | 0.825 |
| 587 | 0.833 | 0.783 | 0.808 | 0.617 | 0.794 | 0.813 |
| 588 | 0.842 | 0.783 | 0.813 | 0.626 | 0.795 | 0.818 |
| 589 | 0.808 | 0.833 | 0.821 | 0.642 | 0.829 | 0.819 |
| 590 | 0.792 | 0.767 | 0.779 | 0.559 | 0.772 | 0.782 |
| 591 | 0.867 | 0.817 | 0.842 | 0.684 | 0.825 | 0.846 |
| 592 | 0.850 | 0.800 | 0.825 | 0.651 | 0.810 | 0.829 |
| 593 | 0.875 | 0.817 | 0.846 | 0.693 | 0.827 | 0.850 |
| 594 | 0.842 | 0.783 | 0.813 | 0.626 | 0.795 | 0.818 |
| 595 | 0.808 | 0.825 | 0.817 | 0.633 | 0.822 | 0.815 |
| 596 | 0.850 | 0.825 | 0.838 | 0.675 | 0.829 | 0.840 |

|     |       |       |       |       |       |       |
|-----|-------|-------|-------|-------|-------|-------|
| 597 | 0.842 | 0.858 | 0.850 | 0.700 | 0.856 | 0.849 |
| 598 | 0.808 | 0.825 | 0.817 | 0.633 | 0.822 | 0.815 |
| 599 | 0.850 | 0.808 | 0.829 | 0.659 | 0.816 | 0.833 |
| 600 | 0.800 | 0.808 | 0.804 | 0.608 | 0.807 | 0.803 |
| 601 | 0.842 | 0.792 | 0.817 | 0.634 | 0.802 | 0.821 |
| 602 | 0.867 | 0.783 | 0.825 | 0.652 | 0.800 | 0.832 |
| 603 | 0.825 | 0.775 | 0.800 | 0.601 | 0.786 | 0.805 |
| 604 | 0.842 | 0.808 | 0.825 | 0.650 | 0.815 | 0.828 |
| 605 | 0.850 | 0.833 | 0.842 | 0.683 | 0.836 | 0.843 |
| 606 | 0.817 | 0.858 | 0.838 | 0.676 | 0.852 | 0.834 |
| 607 | 0.842 | 0.808 | 0.825 | 0.650 | 0.815 | 0.828 |
| 608 | 0.817 | 0.842 | 0.829 | 0.659 | 0.838 | 0.827 |
| 609 | 0.842 | 0.825 | 0.833 | 0.667 | 0.828 | 0.835 |
| 610 | 0.842 | 0.825 | 0.833 | 0.667 | 0.828 | 0.835 |
| 611 | 0.858 | 0.850 | 0.854 | 0.708 | 0.851 | 0.855 |
| 612 | 0.867 | 0.767 | 0.817 | 0.637 | 0.788 | 0.825 |
| 613 | 0.858 | 0.808 | 0.833 | 0.668 | 0.817 | 0.837 |
| 614 | 0.800 | 0.842 | 0.821 | 0.642 | 0.835 | 0.817 |
| 615 | 0.850 | 0.825 | 0.838 | 0.675 | 0.829 | 0.840 |
| 616 | 0.833 | 0.808 | 0.821 | 0.642 | 0.813 | 0.823 |
| 617 | 0.850 | 0.792 | 0.821 | 0.643 | 0.803 | 0.826 |
| 618 | 0.850 | 0.792 | 0.821 | 0.643 | 0.803 | 0.826 |
| 619 | 0.825 | 0.808 | 0.817 | 0.633 | 0.811 | 0.818 |
| 620 | 0.850 | 0.817 | 0.833 | 0.667 | 0.823 | 0.836 |
| 621 | 0.817 | 0.808 | 0.813 | 0.625 | 0.810 | 0.813 |
| 622 | 0.850 | 0.825 | 0.838 | 0.675 | 0.829 | 0.840 |
| 623 | 0.825 | 0.800 | 0.813 | 0.625 | 0.805 | 0.815 |
| 624 | 0.858 | 0.817 | 0.838 | 0.676 | 0.824 | 0.841 |
| 625 | 0.817 | 0.817 | 0.817 | 0.633 | 0.817 | 0.817 |
| 626 | 0.825 | 0.858 | 0.842 | 0.684 | 0.853 | 0.839 |
| 627 | 0.867 | 0.808 | 0.838 | 0.676 | 0.819 | 0.842 |
| 628 | 0.858 | 0.825 | 0.842 | 0.684 | 0.831 | 0.844 |
| 629 | 0.842 | 0.767 | 0.804 | 0.610 | 0.783 | 0.811 |
| 630 | 0.833 | 0.808 | 0.821 | 0.642 | 0.813 | 0.823 |
| 631 | 0.833 | 0.858 | 0.846 | 0.692 | 0.855 | 0.844 |
| 632 | 0.833 | 0.825 | 0.829 | 0.658 | 0.826 | 0.830 |
| 633 | 0.825 | 0.825 | 0.825 | 0.650 | 0.825 | 0.825 |
| 634 | 0.858 | 0.833 | 0.846 | 0.692 | 0.837 | 0.848 |
| 635 | 0.858 | 0.833 | 0.846 | 0.692 | 0.837 | 0.848 |
| 636 | 0.850 | 0.792 | 0.821 | 0.643 | 0.803 | 0.826 |
| 637 | 0.850 | 0.825 | 0.838 | 0.675 | 0.829 | 0.840 |
| 638 | 0.850 | 0.825 | 0.838 | 0.675 | 0.829 | 0.840 |



|     |       |       |       |       |       |       |
|-----|-------|-------|-------|-------|-------|-------|
| 639 | 0.858 | 0.825 | 0.842 | 0.684 | 0.831 | 0.844 |
| 640 | 0.858 | 0.792 | 0.825 | 0.651 | 0.805 | 0.831 |
| 641 | 0.850 | 0.758 | 0.804 | 0.611 | 0.779 | 0.813 |
| 642 | 0.842 | 0.825 | 0.833 | 0.667 | 0.828 | 0.835 |
| 643 | 0.850 | 0.825 | 0.838 | 0.675 | 0.829 | 0.840 |
| 644 | 0.875 | 0.833 | 0.854 | 0.709 | 0.840 | 0.857 |
| 645 | 0.825 | 0.800 | 0.813 | 0.625 | 0.805 | 0.815 |
| 646 | 0.808 | 0.808 | 0.808 | 0.617 | 0.808 | 0.808 |
| 647 | 0.842 | 0.817 | 0.829 | 0.659 | 0.821 | 0.831 |
| 648 | 0.875 | 0.792 | 0.833 | 0.669 | 0.808 | 0.840 |
| 649 | 0.867 | 0.808 | 0.838 | 0.676 | 0.819 | 0.842 |
| 650 | 0.867 | 0.833 | 0.850 | 0.700 | 0.839 | 0.852 |
| 651 | 0.825 | 0.783 | 0.804 | 0.609 | 0.792 | 0.808 |
| 652 | 0.817 | 0.792 | 0.804 | 0.609 | 0.797 | 0.807 |
| 653 | 0.850 | 0.817 | 0.833 | 0.667 | 0.823 | 0.836 |
| 654 | 0.833 | 0.817 | 0.825 | 0.650 | 0.820 | 0.826 |
| 655 | 0.867 | 0.825 | 0.846 | 0.692 | 0.832 | 0.849 |
| 656 | 0.875 | 0.792 | 0.833 | 0.669 | 0.808 | 0.840 |
| 657 | 0.867 | 0.842 | 0.854 | 0.709 | 0.846 | 0.856 |
| 658 | 0.833 | 0.850 | 0.842 | 0.683 | 0.847 | 0.840 |
| 659 | 0.833 | 0.817 | 0.825 | 0.650 | 0.820 | 0.826 |
| 660 | 0.808 | 0.800 | 0.804 | 0.608 | 0.802 | 0.805 |
| 661 | 0.833 | 0.750 | 0.792 | 0.585 | 0.769 | 0.800 |
| 662 | 0.858 | 0.833 | 0.846 | 0.692 | 0.837 | 0.848 |
| 663 | 0.825 | 0.825 | 0.825 | 0.650 | 0.825 | 0.825 |
| 664 | 0.858 | 0.833 | 0.846 | 0.692 | 0.837 | 0.848 |
| 665 | 0.817 | 0.817 | 0.817 | 0.633 | 0.817 | 0.817 |
| 666 | 0.825 | 0.850 | 0.838 | 0.675 | 0.846 | 0.835 |
| 667 | 0.833 | 0.800 | 0.817 | 0.634 | 0.806 | 0.820 |
| 668 | 0.825 | 0.775 | 0.800 | 0.601 | 0.786 | 0.805 |
| 669 | 0.842 | 0.808 | 0.825 | 0.650 | 0.815 | 0.828 |
| 670 | 0.842 | 0.833 | 0.838 | 0.675 | 0.835 | 0.838 |
| 671 | 0.833 | 0.833 | 0.833 | 0.667 | 0.833 | 0.833 |
| 672 | 0.833 | 0.825 | 0.829 | 0.658 | 0.826 | 0.830 |
| 673 | 0.792 | 0.800 | 0.796 | 0.592 | 0.798 | 0.795 |
| 674 | 0.850 | 0.808 | 0.829 | 0.659 | 0.816 | 0.833 |
| 675 | 0.817 | 0.792 | 0.804 | 0.609 | 0.797 | 0.807 |
| 676 | 0.825 | 0.817 | 0.821 | 0.642 | 0.818 | 0.822 |
| 677 | 0.817 | 0.792 | 0.804 | 0.609 | 0.797 | 0.807 |
| 678 | 0.858 | 0.792 | 0.825 | 0.651 | 0.805 | 0.831 |
| 679 | 0.850 | 0.825 | 0.838 | 0.675 | 0.829 | 0.840 |
| 680 | 0.833 | 0.817 | 0.825 | 0.650 | 0.820 | 0.826 |

|     |       |       |       |       |       |       |
|-----|-------|-------|-------|-------|-------|-------|
| 681 | 0.825 | 0.817 | 0.821 | 0.642 | 0.818 | 0.822 |
| 682 | 0.858 | 0.800 | 0.829 | 0.659 | 0.811 | 0.834 |
| 683 | 0.850 | 0.800 | 0.825 | 0.651 | 0.810 | 0.829 |
| 684 | 0.833 | 0.808 | 0.821 | 0.642 | 0.813 | 0.823 |
| 685 | 0.842 | 0.817 | 0.829 | 0.659 | 0.821 | 0.831 |
| 686 | 0.850 | 0.842 | 0.846 | 0.692 | 0.843 | 0.846 |
| 687 | 0.825 | 0.792 | 0.808 | 0.617 | 0.798 | 0.811 |
| 688 | 0.842 | 0.817 | 0.829 | 0.659 | 0.821 | 0.831 |
| 689 | 0.817 | 0.825 | 0.821 | 0.642 | 0.824 | 0.820 |
| 690 | 0.808 | 0.767 | 0.788 | 0.576 | 0.776 | 0.792 |
| 691 | 0.858 | 0.800 | 0.829 | 0.659 | 0.811 | 0.834 |
| 692 | 0.833 | 0.792 | 0.813 | 0.626 | 0.800 | 0.816 |
| 693 | 0.808 | 0.817 | 0.813 | 0.625 | 0.815 | 0.812 |
| 694 | 0.850 | 0.767 | 0.808 | 0.619 | 0.785 | 0.816 |
| 695 | 0.858 | 0.833 | 0.846 | 0.692 | 0.837 | 0.848 |
| 696 | 0.817 | 0.783 | 0.800 | 0.600 | 0.790 | 0.803 |
| 697 | 0.842 | 0.825 | 0.833 | 0.667 | 0.828 | 0.835 |
| 698 | 0.825 | 0.800 | 0.813 | 0.625 | 0.805 | 0.815 |
| 699 | 0.833 | 0.808 | 0.821 | 0.642 | 0.813 | 0.823 |
| 700 | 0.833 | 0.775 | 0.804 | 0.609 | 0.787 | 0.810 |
| 701 | 0.842 | 0.817 | 0.829 | 0.659 | 0.821 | 0.831 |
| 702 | 0.858 | 0.800 | 0.829 | 0.659 | 0.811 | 0.834 |
| 703 | 0.867 | 0.833 | 0.850 | 0.700 | 0.839 | 0.852 |
| 704 | 0.825 | 0.800 | 0.813 | 0.625 | 0.805 | 0.815 |
| 705 | 0.825 | 0.833 | 0.829 | 0.658 | 0.832 | 0.828 |
| 706 | 0.833 | 0.792 | 0.813 | 0.626 | 0.800 | 0.816 |
| 707 | 0.850 | 0.792 | 0.821 | 0.643 | 0.803 | 0.826 |
| 708 | 0.833 | 0.817 | 0.825 | 0.650 | 0.820 | 0.826 |
| 709 | 0.867 | 0.833 | 0.850 | 0.700 | 0.839 | 0.852 |
| 710 | 0.858 | 0.808 | 0.833 | 0.668 | 0.817 | 0.837 |
| 711 | 0.808 | 0.825 | 0.817 | 0.633 | 0.822 | 0.815 |
| 712 | 0.825 | 0.775 | 0.800 | 0.601 | 0.786 | 0.805 |
| 713 | 0.817 | 0.800 | 0.808 | 0.617 | 0.803 | 0.810 |
| 714 | 0.833 | 0.808 | 0.821 | 0.642 | 0.813 | 0.823 |
| 715 | 0.858 | 0.842 | 0.850 | 0.700 | 0.844 | 0.851 |
| 716 | 0.867 | 0.825 | 0.846 | 0.692 | 0.832 | 0.849 |
| 717 | 0.858 | 0.767 | 0.813 | 0.628 | 0.786 | 0.821 |
| 718 | 0.858 | 0.858 | 0.858 | 0.717 | 0.858 | 0.858 |
| 719 | 0.817 | 0.817 | 0.817 | 0.633 | 0.817 | 0.817 |
| 720 | 0.850 | 0.817 | 0.833 | 0.667 | 0.823 | 0.836 |
| 721 | 0.858 | 0.817 | 0.838 | 0.676 | 0.824 | 0.841 |
| 722 | 0.808 | 0.842 | 0.825 | 0.650 | 0.836 | 0.822 |

|     |       |       |       |       |       |       |
|-----|-------|-------|-------|-------|-------|-------|
| 723 | 0.825 | 0.817 | 0.821 | 0.642 | 0.818 | 0.822 |
| 724 | 0.833 | 0.792 | 0.813 | 0.626 | 0.800 | 0.816 |
| 725 | 0.842 | 0.833 | 0.838 | 0.675 | 0.835 | 0.838 |
| 726 | 0.858 | 0.850 | 0.854 | 0.708 | 0.851 | 0.855 |
| 727 | 0.800 | 0.808 | 0.804 | 0.608 | 0.807 | 0.803 |
| 728 | 0.825 | 0.867 | 0.846 | 0.692 | 0.861 | 0.843 |
| 729 | 0.875 | 0.842 | 0.858 | 0.717 | 0.847 | 0.861 |
| 730 | 0.792 | 0.833 | 0.813 | 0.626 | 0.826 | 0.809 |
| 731 | 0.817 | 0.817 | 0.817 | 0.633 | 0.817 | 0.817 |
| 732 | 0.833 | 0.775 | 0.804 | 0.609 | 0.787 | 0.810 |
| 733 | 0.858 | 0.825 | 0.842 | 0.684 | 0.831 | 0.844 |
| 734 | 0.867 | 0.842 | 0.854 | 0.709 | 0.846 | 0.856 |
| 735 | 0.833 | 0.817 | 0.825 | 0.650 | 0.820 | 0.826 |
| 736 | 0.850 | 0.792 | 0.821 | 0.643 | 0.803 | 0.826 |
| 737 | 0.850 | 0.792 | 0.821 | 0.643 | 0.803 | 0.826 |
| 738 | 0.825 | 0.792 | 0.808 | 0.617 | 0.798 | 0.811 |
| 739 | 0.825 | 0.825 | 0.825 | 0.650 | 0.825 | 0.825 |
| 740 | 0.792 | 0.800 | 0.796 | 0.592 | 0.798 | 0.795 |
| 741 | 0.825 | 0.833 | 0.829 | 0.658 | 0.832 | 0.828 |
| 742 | 0.833 | 0.833 | 0.833 | 0.667 | 0.833 | 0.833 |
| 743 | 0.800 | 0.817 | 0.808 | 0.617 | 0.814 | 0.807 |
| 744 | 0.817 | 0.833 | 0.825 | 0.650 | 0.831 | 0.824 |
| 745 | 0.833 | 0.858 | 0.846 | 0.692 | 0.855 | 0.844 |
| 746 | 0.825 | 0.817 | 0.821 | 0.642 | 0.818 | 0.822 |
| 747 | 0.850 | 0.775 | 0.813 | 0.627 | 0.791 | 0.819 |
| 748 | 0.858 | 0.817 | 0.838 | 0.676 | 0.824 | 0.841 |
| 749 | 0.800 | 0.875 | 0.838 | 0.677 | 0.865 | 0.831 |
| 750 | 0.858 | 0.800 | 0.829 | 0.659 | 0.811 | 0.834 |
| 751 | 0.842 | 0.808 | 0.825 | 0.650 | 0.815 | 0.828 |
| 752 | 0.850 | 0.775 | 0.813 | 0.627 | 0.791 | 0.819 |
| 753 | 0.850 | 0.808 | 0.829 | 0.659 | 0.816 | 0.833 |
| 754 | 0.842 | 0.800 | 0.821 | 0.642 | 0.808 | 0.824 |
| 755 | 0.833 | 0.775 | 0.804 | 0.609 | 0.787 | 0.810 |
| 756 | 0.833 | 0.825 | 0.829 | 0.658 | 0.826 | 0.830 |
| 757 | 0.842 | 0.792 | 0.817 | 0.634 | 0.802 | 0.821 |
| 758 | 0.800 | 0.825 | 0.813 | 0.625 | 0.821 | 0.810 |
| 759 | 0.833 | 0.800 | 0.817 | 0.634 | 0.806 | 0.820 |
| 760 | 0.867 | 0.792 | 0.829 | 0.660 | 0.806 | 0.835 |
| 761 | 0.850 | 0.833 | 0.842 | 0.683 | 0.836 | 0.843 |
| 762 | 0.833 | 0.817 | 0.825 | 0.650 | 0.820 | 0.826 |
| 763 | 0.825 | 0.825 | 0.825 | 0.650 | 0.825 | 0.825 |
| 764 | 0.850 | 0.808 | 0.829 | 0.659 | 0.816 | 0.833 |

|     |       |       |       |       |       |       |
|-----|-------|-------|-------|-------|-------|-------|
| 765 | 0.842 | 0.825 | 0.833 | 0.667 | 0.828 | 0.835 |
| 766 | 0.808 | 0.808 | 0.808 | 0.617 | 0.808 | 0.808 |
| 767 | 0.817 | 0.825 | 0.821 | 0.642 | 0.824 | 0.820 |
| 768 | 0.817 | 0.792 | 0.804 | 0.609 | 0.797 | 0.807 |
| 769 | 0.875 | 0.808 | 0.842 | 0.685 | 0.820 | 0.847 |
| 770 | 0.792 | 0.792 | 0.792 | 0.583 | 0.792 | 0.792 |
| 771 | 0.825 | 0.808 | 0.817 | 0.633 | 0.811 | 0.818 |
| 772 | 0.825 | 0.817 | 0.821 | 0.642 | 0.818 | 0.822 |
| 773 | 0.850 | 0.842 | 0.846 | 0.692 | 0.843 | 0.846 |
| 774 | 0.850 | 0.808 | 0.829 | 0.659 | 0.816 | 0.833 |
| 775 | 0.808 | 0.817 | 0.813 | 0.625 | 0.815 | 0.812 |
| 776 | 0.800 | 0.808 | 0.804 | 0.608 | 0.807 | 0.803 |
| 777 | 0.825 | 0.775 | 0.800 | 0.601 | 0.786 | 0.805 |
| 778 | 0.825 | 0.850 | 0.838 | 0.675 | 0.846 | 0.835 |
| 779 | 0.833 | 0.775 | 0.804 | 0.609 | 0.787 | 0.810 |
| 780 | 0.825 | 0.817 | 0.821 | 0.642 | 0.818 | 0.822 |
| 781 | 0.792 | 0.767 | 0.779 | 0.559 | 0.772 | 0.782 |
| 782 | 0.842 | 0.833 | 0.838 | 0.675 | 0.835 | 0.838 |
| 783 | 0.850 | 0.833 | 0.842 | 0.683 | 0.836 | 0.843 |
| 784 | 0.833 | 0.767 | 0.800 | 0.601 | 0.781 | 0.806 |
| 785 | 0.808 | 0.858 | 0.833 | 0.668 | 0.851 | 0.829 |
| 786 | 0.808 | 0.758 | 0.783 | 0.567 | 0.770 | 0.789 |
| 787 | 0.833 | 0.833 | 0.833 | 0.667 | 0.833 | 0.833 |
| 788 | 0.833 | 0.800 | 0.817 | 0.634 | 0.806 | 0.820 |
| 789 | 0.867 | 0.750 | 0.808 | 0.621 | 0.776 | 0.819 |
| 790 | 0.850 | 0.792 | 0.821 | 0.643 | 0.803 | 0.826 |
| 791 | 0.792 | 0.808 | 0.800 | 0.600 | 0.805 | 0.798 |
| 792 | 0.833 | 0.817 | 0.825 | 0.650 | 0.820 | 0.826 |
| 793 | 0.850 | 0.800 | 0.825 | 0.651 | 0.810 | 0.829 |
| 794 | 0.833 | 0.800 | 0.817 | 0.634 | 0.806 | 0.820 |
| 795 | 0.808 | 0.875 | 0.842 | 0.685 | 0.866 | 0.836 |
| 796 | 0.783 | 0.800 | 0.792 | 0.583 | 0.797 | 0.790 |
| 797 | 0.842 | 0.817 | 0.829 | 0.659 | 0.821 | 0.831 |
| 798 | 0.808 | 0.783 | 0.796 | 0.592 | 0.789 | 0.798 |
| 799 | 0.850 | 0.817 | 0.833 | 0.667 | 0.823 | 0.836 |
| 800 | 0.817 | 0.808 | 0.813 | 0.625 | 0.810 | 0.813 |
| 801 | 0.817 | 0.850 | 0.833 | 0.667 | 0.845 | 0.831 |
| 802 | 0.833 | 0.825 | 0.829 | 0.658 | 0.826 | 0.830 |
| 803 | 0.850 | 0.783 | 0.817 | 0.635 | 0.797 | 0.823 |
| 804 | 0.867 | 0.808 | 0.838 | 0.676 | 0.819 | 0.842 |
| 805 | 0.850 | 0.733 | 0.792 | 0.587 | 0.761 | 0.803 |
| 806 | 0.817 | 0.825 | 0.821 | 0.642 | 0.824 | 0.820 |

|     |       |       |       |       |       |       |
|-----|-------|-------|-------|-------|-------|-------|
| 807 | 0.833 | 0.833 | 0.833 | 0.667 | 0.833 | 0.833 |
| 808 | 0.825 | 0.808 | 0.817 | 0.633 | 0.811 | 0.818 |
| 809 | 0.808 | 0.800 | 0.804 | 0.608 | 0.802 | 0.805 |
| 810 | 0.833 | 0.817 | 0.825 | 0.650 | 0.820 | 0.826 |
| 811 | 0.817 | 0.817 | 0.817 | 0.633 | 0.817 | 0.817 |
| 812 | 0.842 | 0.817 | 0.829 | 0.659 | 0.821 | 0.831 |
| 813 | 0.825 | 0.800 | 0.813 | 0.625 | 0.805 | 0.815 |
| 814 | 0.850 | 0.825 | 0.838 | 0.675 | 0.829 | 0.840 |
| 815 | 0.817 | 0.792 | 0.804 | 0.609 | 0.797 | 0.807 |
| 816 | 0.833 | 0.808 | 0.821 | 0.642 | 0.813 | 0.823 |
| 817 | 0.850 | 0.842 | 0.846 | 0.692 | 0.843 | 0.846 |
| 818 | 0.825 | 0.783 | 0.804 | 0.609 | 0.792 | 0.808 |
| 819 | 0.833 | 0.850 | 0.842 | 0.683 | 0.847 | 0.840 |
| 820 | 0.842 | 0.792 | 0.817 | 0.634 | 0.802 | 0.821 |
| 821 | 0.858 | 0.817 | 0.838 | 0.676 | 0.824 | 0.841 |
| 822 | 0.800 | 0.842 | 0.821 | 0.642 | 0.835 | 0.817 |
| 823 | 0.833 | 0.817 | 0.825 | 0.650 | 0.820 | 0.826 |
| 824 | 0.808 | 0.883 | 0.846 | 0.694 | 0.874 | 0.840 |
| 825 | 0.817 | 0.817 | 0.817 | 0.633 | 0.817 | 0.817 |
| 826 | 0.825 | 0.808 | 0.817 | 0.633 | 0.811 | 0.818 |
| 827 | 0.858 | 0.850 | 0.854 | 0.708 | 0.851 | 0.855 |
| 828 | 0.825 | 0.817 | 0.821 | 0.642 | 0.818 | 0.822 |
| 829 | 0.792 | 0.833 | 0.813 | 0.626 | 0.826 | 0.809 |
| 830 | 0.833 | 0.775 | 0.804 | 0.609 | 0.787 | 0.810 |
| 831 | 0.833 | 0.817 | 0.825 | 0.650 | 0.820 | 0.826 |
| 832 | 0.833 | 0.783 | 0.808 | 0.617 | 0.794 | 0.813 |
| 833 | 0.883 | 0.833 | 0.858 | 0.718 | 0.841 | 0.862 |
| 834 | 0.842 | 0.792 | 0.817 | 0.634 | 0.802 | 0.821 |
| 835 | 0.833 | 0.842 | 0.838 | 0.675 | 0.840 | 0.837 |
| 836 | 0.842 | 0.783 | 0.813 | 0.626 | 0.795 | 0.818 |
| 837 | 0.808 | 0.825 | 0.817 | 0.633 | 0.822 | 0.815 |
| 838 | 0.850 | 0.783 | 0.817 | 0.635 | 0.797 | 0.823 |
| 839 | 0.792 | 0.808 | 0.800 | 0.600 | 0.805 | 0.798 |
| 840 | 0.850 | 0.817 | 0.833 | 0.667 | 0.823 | 0.836 |
| 841 | 0.850 | 0.783 | 0.817 | 0.635 | 0.797 | 0.823 |
| 842 | 0.808 | 0.808 | 0.808 | 0.617 | 0.808 | 0.808 |
| 843 | 0.817 | 0.783 | 0.800 | 0.600 | 0.790 | 0.803 |
| 844 | 0.858 | 0.792 | 0.825 | 0.651 | 0.805 | 0.831 |
| 845 | 0.833 | 0.792 | 0.813 | 0.626 | 0.800 | 0.816 |
| 846 | 0.817 | 0.800 | 0.808 | 0.617 | 0.803 | 0.810 |
| 847 | 0.825 | 0.842 | 0.833 | 0.667 | 0.839 | 0.832 |
| 848 | 0.842 | 0.817 | 0.829 | 0.659 | 0.821 | 0.831 |

|     |       |       |       |       |       |       |
|-----|-------|-------|-------|-------|-------|-------|
| 849 | 0.833 | 0.792 | 0.813 | 0.626 | 0.800 | 0.816 |
| 850 | 0.858 | 0.817 | 0.838 | 0.676 | 0.824 | 0.841 |
| 851 | 0.833 | 0.783 | 0.808 | 0.617 | 0.794 | 0.813 |
| 852 | 0.858 | 0.792 | 0.825 | 0.651 | 0.805 | 0.831 |
| 853 | 0.783 | 0.792 | 0.788 | 0.575 | 0.790 | 0.787 |
| 854 | 0.792 | 0.808 | 0.800 | 0.600 | 0.805 | 0.798 |
| 855 | 0.817 | 0.783 | 0.800 | 0.600 | 0.790 | 0.803 |
| 856 | 0.850 | 0.792 | 0.821 | 0.643 | 0.803 | 0.826 |
| 857 | 0.850 | 0.775 | 0.813 | 0.627 | 0.791 | 0.819 |
| 858 | 0.858 | 0.833 | 0.846 | 0.692 | 0.837 | 0.848 |
| 859 | 0.833 | 0.792 | 0.813 | 0.626 | 0.800 | 0.816 |
| 860 | 0.850 | 0.783 | 0.817 | 0.635 | 0.797 | 0.823 |
| 861 | 0.842 | 0.817 | 0.829 | 0.659 | 0.821 | 0.831 |
| 862 | 0.825 | 0.817 | 0.821 | 0.642 | 0.818 | 0.822 |
| 863 | 0.858 | 0.792 | 0.825 | 0.651 | 0.805 | 0.831 |
| 864 | 0.833 | 0.792 | 0.813 | 0.626 | 0.800 | 0.816 |
| 865 | 0.808 | 0.817 | 0.813 | 0.625 | 0.815 | 0.812 |
| 866 | 0.817 | 0.800 | 0.808 | 0.617 | 0.803 | 0.810 |
| 867 | 0.850 | 0.817 | 0.833 | 0.667 | 0.823 | 0.836 |
| 868 | 0.833 | 0.808 | 0.821 | 0.642 | 0.813 | 0.823 |
| 869 | 0.883 | 0.800 | 0.842 | 0.686 | 0.815 | 0.848 |
| 870 | 0.808 | 0.817 | 0.813 | 0.625 | 0.815 | 0.812 |
| 871 | 0.808 | 0.817 | 0.813 | 0.625 | 0.815 | 0.812 |
| 872 | 0.808 | 0.808 | 0.808 | 0.617 | 0.808 | 0.808 |
| 873 | 0.842 | 0.808 | 0.825 | 0.650 | 0.815 | 0.828 |
| 874 | 0.833 | 0.858 | 0.846 | 0.692 | 0.855 | 0.844 |
| 875 | 0.850 | 0.800 | 0.825 | 0.651 | 0.810 | 0.829 |
| 876 | 0.808 | 0.833 | 0.821 | 0.642 | 0.829 | 0.819 |
| 877 | 0.800 | 0.783 | 0.792 | 0.583 | 0.787 | 0.793 |
| 878 | 0.817 | 0.808 | 0.813 | 0.625 | 0.810 | 0.813 |
| 879 | 0.850 | 0.808 | 0.829 | 0.659 | 0.816 | 0.833 |
| 880 | 0.850 | 0.783 | 0.817 | 0.635 | 0.797 | 0.823 |
| 881 | 0.833 | 0.800 | 0.817 | 0.634 | 0.806 | 0.820 |
| 882 | 0.858 | 0.800 | 0.829 | 0.659 | 0.811 | 0.834 |
| 883 | 0.833 | 0.825 | 0.829 | 0.658 | 0.826 | 0.830 |
| 884 | 0.842 | 0.800 | 0.821 | 0.642 | 0.808 | 0.824 |
| 885 | 0.808 | 0.833 | 0.821 | 0.642 | 0.829 | 0.819 |
| 886 | 0.825 | 0.775 | 0.800 | 0.601 | 0.786 | 0.805 |
| 887 | 0.842 | 0.817 | 0.829 | 0.659 | 0.821 | 0.831 |
| 888 | 0.850 | 0.800 | 0.825 | 0.651 | 0.810 | 0.829 |
| 889 | 0.833 | 0.792 | 0.813 | 0.626 | 0.800 | 0.816 |
| 890 | 0.783 | 0.800 | 0.792 | 0.583 | 0.797 | 0.790 |

|     |       |       |       |       |       |       |
|-----|-------|-------|-------|-------|-------|-------|
| 891 | 0.867 | 0.817 | 0.842 | 0.684 | 0.825 | 0.846 |
| 892 | 0.858 | 0.833 | 0.846 | 0.692 | 0.837 | 0.848 |
| 893 | 0.817 | 0.767 | 0.792 | 0.584 | 0.778 | 0.797 |
| 894 | 0.850 | 0.767 | 0.808 | 0.619 | 0.785 | 0.816 |
| 895 | 0.842 | 0.842 | 0.842 | 0.683 | 0.842 | 0.842 |
| 896 | 0.825 | 0.792 | 0.808 | 0.617 | 0.798 | 0.811 |
| 897 | 0.808 | 0.833 | 0.821 | 0.642 | 0.829 | 0.819 |
| 898 | 0.833 | 0.817 | 0.825 | 0.650 | 0.820 | 0.826 |
| 899 | 0.808 | 0.800 | 0.804 | 0.608 | 0.802 | 0.805 |
| 900 | 0.817 | 0.808 | 0.813 | 0.625 | 0.810 | 0.813 |
| 901 | 0.792 | 0.817 | 0.804 | 0.609 | 0.812 | 0.802 |
| 902 | 0.842 | 0.833 | 0.838 | 0.675 | 0.835 | 0.838 |
| 903 | 0.833 | 0.808 | 0.821 | 0.642 | 0.813 | 0.823 |
| 904 | 0.825 | 0.783 | 0.804 | 0.609 | 0.792 | 0.808 |
| 905 | 0.833 | 0.792 | 0.813 | 0.626 | 0.800 | 0.816 |
| 906 | 0.867 | 0.808 | 0.838 | 0.676 | 0.819 | 0.842 |
| 907 | 0.842 | 0.792 | 0.817 | 0.634 | 0.802 | 0.821 |
| 908 | 0.825 | 0.833 | 0.829 | 0.658 | 0.832 | 0.828 |
| 909 | 0.800 | 0.808 | 0.804 | 0.608 | 0.807 | 0.803 |
| 910 | 0.817 | 0.842 | 0.829 | 0.659 | 0.838 | 0.827 |
| 911 | 0.833 | 0.808 | 0.821 | 0.642 | 0.813 | 0.823 |
| 912 | 0.808 | 0.783 | 0.796 | 0.592 | 0.789 | 0.798 |
| 913 | 0.833 | 0.825 | 0.829 | 0.658 | 0.826 | 0.830 |
| 914 | 0.808 | 0.792 | 0.800 | 0.600 | 0.795 | 0.802 |
| 915 | 0.833 | 0.858 | 0.846 | 0.692 | 0.855 | 0.844 |
| 916 | 0.842 | 0.800 | 0.821 | 0.642 | 0.808 | 0.824 |
| 917 | 0.875 | 0.808 | 0.842 | 0.685 | 0.820 | 0.847 |
| 918 | 0.867 | 0.808 | 0.838 | 0.676 | 0.819 | 0.842 |
| 919 | 0.825 | 0.833 | 0.829 | 0.658 | 0.832 | 0.828 |
| 920 | 0.833 | 0.825 | 0.829 | 0.658 | 0.826 | 0.830 |
| 921 | 0.817 | 0.808 | 0.813 | 0.625 | 0.810 | 0.813 |
| 922 | 0.850 | 0.842 | 0.846 | 0.692 | 0.843 | 0.846 |
| 923 | 0.825 | 0.792 | 0.808 | 0.617 | 0.798 | 0.811 |
| 924 | 0.842 | 0.775 | 0.808 | 0.618 | 0.789 | 0.815 |
| 925 | 0.858 | 0.808 | 0.833 | 0.668 | 0.817 | 0.837 |
| 926 | 0.858 | 0.808 | 0.833 | 0.668 | 0.817 | 0.837 |
| 927 | 0.808 | 0.808 | 0.808 | 0.617 | 0.808 | 0.808 |
| 928 | 0.825 | 0.800 | 0.813 | 0.625 | 0.805 | 0.815 |
| 929 | 0.800 | 0.808 | 0.804 | 0.608 | 0.807 | 0.803 |
| 930 | 0.817 | 0.825 | 0.821 | 0.642 | 0.824 | 0.820 |
| 931 | 0.842 | 0.817 | 0.829 | 0.659 | 0.821 | 0.831 |
| 932 | 0.833 | 0.817 | 0.825 | 0.650 | 0.820 | 0.826 |

|     |       |       |       |       |       |       |
|-----|-------|-------|-------|-------|-------|-------|
| 933 | 0.850 | 0.792 | 0.821 | 0.643 | 0.803 | 0.826 |
| 934 | 0.825 | 0.775 | 0.800 | 0.601 | 0.786 | 0.805 |
| 935 | 0.842 | 0.783 | 0.813 | 0.626 | 0.795 | 0.818 |
| 936 | 0.817 | 0.808 | 0.813 | 0.625 | 0.810 | 0.813 |
| 937 | 0.825 | 0.783 | 0.804 | 0.609 | 0.792 | 0.808 |
| 938 | 0.842 | 0.833 | 0.838 | 0.675 | 0.835 | 0.838 |
| 939 | 0.800 | 0.783 | 0.792 | 0.583 | 0.787 | 0.793 |
| 940 | 0.817 | 0.800 | 0.808 | 0.617 | 0.803 | 0.810 |
| 941 | 0.850 | 0.758 | 0.804 | 0.611 | 0.779 | 0.813 |
| 942 | 0.808 | 0.825 | 0.817 | 0.633 | 0.822 | 0.815 |
| 943 | 0.842 | 0.808 | 0.825 | 0.650 | 0.815 | 0.828 |
| 944 | 0.825 | 0.850 | 0.838 | 0.675 | 0.846 | 0.835 |
| 945 | 0.833 | 0.817 | 0.825 | 0.650 | 0.820 | 0.826 |
| 946 | 0.833 | 0.817 | 0.825 | 0.650 | 0.820 | 0.826 |
| 947 | 0.858 | 0.775 | 0.817 | 0.636 | 0.792 | 0.824 |
| 948 | 0.808 | 0.800 | 0.804 | 0.608 | 0.802 | 0.805 |
| 949 | 0.825 | 0.825 | 0.825 | 0.650 | 0.825 | 0.825 |
| 950 | 0.867 | 0.817 | 0.842 | 0.684 | 0.825 | 0.846 |
| 951 | 0.842 | 0.867 | 0.854 | 0.709 | 0.863 | 0.852 |
| 952 | 0.792 | 0.792 | 0.792 | 0.583 | 0.792 | 0.792 |
| 953 | 0.808 | 0.800 | 0.804 | 0.608 | 0.802 | 0.805 |
| 954 | 0.842 | 0.825 | 0.833 | 0.667 | 0.828 | 0.835 |
| 955 | 0.833 | 0.800 | 0.817 | 0.634 | 0.806 | 0.820 |
| 956 | 0.792 | 0.783 | 0.788 | 0.575 | 0.785 | 0.788 |
| 957 | 0.867 | 0.783 | 0.825 | 0.652 | 0.800 | 0.832 |
| 958 | 0.858 | 0.817 | 0.838 | 0.676 | 0.824 | 0.841 |
| 959 | 0.817 | 0.825 | 0.821 | 0.642 | 0.824 | 0.820 |
| 960 | 0.825 | 0.800 | 0.813 | 0.625 | 0.805 | 0.815 |
| 961 | 0.825 | 0.783 | 0.804 | 0.609 | 0.792 | 0.808 |
| 962 | 0.817 | 0.808 | 0.813 | 0.625 | 0.810 | 0.813 |
| 963 | 0.842 | 0.808 | 0.825 | 0.650 | 0.815 | 0.828 |
| 964 | 0.800 | 0.808 | 0.804 | 0.608 | 0.807 | 0.803 |
| 965 | 0.833 | 0.783 | 0.808 | 0.617 | 0.794 | 0.813 |
| 966 | 0.825 | 0.808 | 0.817 | 0.633 | 0.811 | 0.818 |
| 967 | 0.817 | 0.767 | 0.792 | 0.584 | 0.778 | 0.797 |
| 968 | 0.817 | 0.833 | 0.825 | 0.650 | 0.831 | 0.824 |
| 969 | 0.808 | 0.775 | 0.792 | 0.584 | 0.782 | 0.795 |
| 970 | 0.833 | 0.825 | 0.829 | 0.658 | 0.826 | 0.830 |
| 971 | 0.867 | 0.833 | 0.850 | 0.700 | 0.839 | 0.852 |
| 972 | 0.833 | 0.808 | 0.821 | 0.642 | 0.813 | 0.823 |
| 973 | 0.850 | 0.783 | 0.817 | 0.635 | 0.797 | 0.823 |
| 974 | 0.858 | 0.817 | 0.838 | 0.676 | 0.824 | 0.841 |



|      |       |       |       |       |       |       |
|------|-------|-------|-------|-------|-------|-------|
| 975  | 0.833 | 0.825 | 0.829 | 0.658 | 0.826 | 0.830 |
| 976  | 0.817 | 0.800 | 0.808 | 0.617 | 0.803 | 0.810 |
| 977  | 0.817 | 0.783 | 0.800 | 0.600 | 0.790 | 0.803 |
| 978  | 0.833 | 0.750 | 0.792 | 0.585 | 0.769 | 0.800 |
| 979  | 0.808 | 0.792 | 0.800 | 0.600 | 0.795 | 0.802 |
| 980  | 0.817 | 0.817 | 0.817 | 0.633 | 0.817 | 0.817 |
| 981  | 0.833 | 0.808 | 0.821 | 0.642 | 0.813 | 0.823 |
| 982  | 0.825 | 0.767 | 0.796 | 0.593 | 0.780 | 0.802 |
| 983  | 0.850 | 0.792 | 0.821 | 0.643 | 0.803 | 0.826 |
| 984  | 0.808 | 0.833 | 0.821 | 0.642 | 0.829 | 0.819 |
| 985  | 0.792 | 0.825 | 0.808 | 0.617 | 0.819 | 0.805 |
| 986  | 0.808 | 0.808 | 0.808 | 0.617 | 0.808 | 0.808 |
| 987  | 0.808 | 0.783 | 0.796 | 0.592 | 0.789 | 0.798 |
| 988  | 0.825 | 0.817 | 0.821 | 0.642 | 0.818 | 0.822 |
| 989  | 0.808 | 0.850 | 0.829 | 0.659 | 0.843 | 0.826 |
| 990  | 0.817 | 0.800 | 0.808 | 0.617 | 0.803 | 0.810 |
| 991  | 0.817 | 0.767 | 0.792 | 0.584 | 0.778 | 0.797 |
| 992  | 0.858 | 0.775 | 0.817 | 0.636 | 0.792 | 0.824 |
| 993  | 0.783 | 0.817 | 0.800 | 0.600 | 0.810 | 0.797 |
| 994  | 0.833 | 0.783 | 0.808 | 0.617 | 0.794 | 0.813 |
| 995  | 0.825 | 0.850 | 0.838 | 0.675 | 0.846 | 0.835 |
| 996  | 0.842 | 0.775 | 0.808 | 0.618 | 0.789 | 0.815 |
| 997  | 0.833 | 0.833 | 0.833 | 0.667 | 0.833 | 0.833 |
| 998  | 0.808 | 0.825 | 0.817 | 0.633 | 0.822 | 0.815 |
| 999  | 0.842 | 0.775 | 0.808 | 0.618 | 0.789 | 0.815 |
| 1000 | 0.825 | 0.792 | 0.808 | 0.617 | 0.798 | 0.811 |
| 1001 | 0.792 | 0.850 | 0.821 | 0.643 | 0.841 | 0.815 |
| 1002 | 0.842 | 0.825 | 0.833 | 0.667 | 0.828 | 0.835 |
| 1003 | 0.825 | 0.817 | 0.821 | 0.642 | 0.818 | 0.822 |
| 1004 | 0.850 | 0.825 | 0.838 | 0.675 | 0.829 | 0.840 |
| 1005 | 0.850 | 0.792 | 0.821 | 0.643 | 0.803 | 0.826 |
| 1006 | 0.842 | 0.858 | 0.850 | 0.700 | 0.856 | 0.849 |
| 1007 | 0.825 | 0.817 | 0.821 | 0.642 | 0.818 | 0.822 |
| 1008 | 0.800 | 0.850 | 0.825 | 0.651 | 0.842 | 0.821 |
| 1009 | 0.808 | 0.767 | 0.788 | 0.576 | 0.776 | 0.792 |
| 1010 | 0.817 | 0.808 | 0.813 | 0.625 | 0.810 | 0.813 |
| 1011 | 0.792 | 0.792 | 0.792 | 0.583 | 0.792 | 0.792 |
| 1012 | 0.808 | 0.800 | 0.804 | 0.608 | 0.802 | 0.805 |
| 1013 | 0.825 | 0.767 | 0.796 | 0.593 | 0.780 | 0.802 |
| 1014 | 0.842 | 0.792 | 0.817 | 0.634 | 0.802 | 0.821 |
| 1015 | 0.808 | 0.800 | 0.804 | 0.608 | 0.802 | 0.805 |
| 1016 | 0.792 | 0.842 | 0.817 | 0.634 | 0.833 | 0.812 |

|      |       |       |       |       |       |       |
|------|-------|-------|-------|-------|-------|-------|
| 1017 | 0.808 | 0.858 | 0.833 | 0.668 | 0.851 | 0.829 |
| 1018 | 0.833 | 0.800 | 0.817 | 0.634 | 0.806 | 0.820 |
| 1019 | 0.850 | 0.800 | 0.825 | 0.651 | 0.810 | 0.829 |
| 1020 | 0.825 | 0.833 | 0.829 | 0.658 | 0.832 | 0.828 |

#### (4) Support vector machine

| Number of features | SN    | SP    | ACC   | MCC   | Precision | F1-measure |
|--------------------|-------|-------|-------|-------|-----------|------------|
| 1                  | 0.642 | 0.733 | 0.688 | 0.377 | 0.706     | 0.672      |
| 2                  | 0.742 | 0.683 | 0.713 | 0.426 | 0.701     | 0.721      |
| 3                  | 0.708 | 0.792 | 0.750 | 0.502 | 0.773     | 0.739      |
| 4                  | 0.758 | 0.775 | 0.767 | 0.533 | 0.771     | 0.765      |
| 5                  | 0.783 | 0.825 | 0.804 | 0.609 | 0.817     | 0.800      |
| 6                  | 0.817 | 0.875 | 0.846 | 0.693 | 0.867     | 0.841      |
| 7                  | 0.808 | 0.875 | 0.842 | 0.685 | 0.866     | 0.836      |
| 8                  | 0.817 | 0.892 | 0.854 | 0.710 | 0.883     | 0.848      |
| 9                  | 0.808 | 0.883 | 0.846 | 0.694 | 0.874     | 0.840      |
| 10                 | 0.800 | 0.883 | 0.842 | 0.686 | 0.873     | 0.835      |
| 11                 | 0.825 | 0.875 | 0.850 | 0.701 | 0.868     | 0.846      |
| 12                 | 0.800 | 0.858 | 0.829 | 0.659 | 0.850     | 0.824      |
| 13                 | 0.800 | 0.858 | 0.829 | 0.659 | 0.850     | 0.824      |
| 14                 | 0.808 | 0.867 | 0.838 | 0.676 | 0.858     | 0.833      |
| 15                 | 0.825 | 0.850 | 0.838 | 0.675 | 0.846     | 0.835      |
| 16                 | 0.842 | 0.858 | 0.850 | 0.700 | 0.856     | 0.849      |
| 17                 | 0.833 | 0.850 | 0.842 | 0.683 | 0.847     | 0.840      |
| 18                 | 0.842 | 0.867 | 0.854 | 0.709 | 0.863     | 0.852      |
| 19                 | 0.842 | 0.858 | 0.850 | 0.700 | 0.856     | 0.849      |
| 20                 | 0.833 | 0.858 | 0.846 | 0.692 | 0.855     | 0.844      |
| 21                 | 0.833 | 0.875 | 0.854 | 0.709 | 0.870     | 0.851      |
| 22                 | 0.833 | 0.867 | 0.850 | 0.700 | 0.862     | 0.847      |
| 23                 | 0.825 | 0.867 | 0.846 | 0.692 | 0.861     | 0.843      |
| 24                 | 0.800 | 0.883 | 0.842 | 0.686 | 0.873     | 0.835      |
| 25                 | 0.800 | 0.867 | 0.833 | 0.668 | 0.857     | 0.828      |
| 26                 | 0.808 | 0.867 | 0.838 | 0.676 | 0.858     | 0.833      |
| 27                 | 0.800 | 0.867 | 0.833 | 0.668 | 0.857     | 0.828      |
| 28                 | 0.817 | 0.867 | 0.842 | 0.684 | 0.860     | 0.838      |
| 29                 | 0.808 | 0.867 | 0.838 | 0.676 | 0.858     | 0.833      |
| 30                 | 0.800 | 0.883 | 0.842 | 0.686 | 0.873     | 0.835      |
| 31                 | 0.808 | 0.875 | 0.842 | 0.685 | 0.866     | 0.836      |
| 32                 | 0.808 | 0.867 | 0.838 | 0.676 | 0.858     | 0.833      |
| 33                 | 0.825 | 0.875 | 0.850 | 0.701 | 0.868     | 0.846      |
| 34                 | 0.817 | 0.875 | 0.846 | 0.693 | 0.867     | 0.841      |
| 35                 | 0.817 | 0.883 | 0.850 | 0.702 | 0.875     | 0.845      |

|    |       |       |       |       |       |       |
|----|-------|-------|-------|-------|-------|-------|
| 36 | 0.808 | 0.883 | 0.846 | 0.694 | 0.874 | 0.840 |
| 37 | 0.800 | 0.900 | 0.850 | 0.704 | 0.889 | 0.842 |
| 38 | 0.800 | 0.900 | 0.850 | 0.704 | 0.889 | 0.842 |
| 39 | 0.800 | 0.917 | 0.858 | 0.722 | 0.906 | 0.850 |
| 40 | 0.808 | 0.917 | 0.863 | 0.729 | 0.907 | 0.855 |
| 41 | 0.808 | 0.900 | 0.854 | 0.711 | 0.890 | 0.847 |
| 42 | 0.808 | 0.900 | 0.854 | 0.711 | 0.890 | 0.847 |
| 43 | 0.808 | 0.892 | 0.850 | 0.702 | 0.882 | 0.843 |
| 44 | 0.825 | 0.900 | 0.863 | 0.727 | 0.892 | 0.857 |
| 45 | 0.817 | 0.892 | 0.854 | 0.710 | 0.883 | 0.848 |
| 46 | 0.817 | 0.908 | 0.863 | 0.728 | 0.899 | 0.856 |
| 47 | 0.808 | 0.900 | 0.854 | 0.711 | 0.890 | 0.847 |
| 48 | 0.808 | 0.900 | 0.854 | 0.711 | 0.890 | 0.847 |
| 49 | 0.817 | 0.883 | 0.850 | 0.702 | 0.875 | 0.845 |
| 50 | 0.808 | 0.883 | 0.846 | 0.694 | 0.874 | 0.840 |
| 51 | 0.808 | 0.875 | 0.842 | 0.685 | 0.866 | 0.836 |
| 52 | 0.808 | 0.900 | 0.854 | 0.711 | 0.890 | 0.847 |
| 53 | 0.808 | 0.900 | 0.854 | 0.711 | 0.890 | 0.847 |
| 54 | 0.817 | 0.900 | 0.858 | 0.719 | 0.891 | 0.852 |
| 55 | 0.817 | 0.892 | 0.854 | 0.710 | 0.883 | 0.848 |
| 56 | 0.808 | 0.900 | 0.854 | 0.711 | 0.890 | 0.847 |
| 57 | 0.808 | 0.892 | 0.850 | 0.702 | 0.882 | 0.843 |
| 58 | 0.808 | 0.892 | 0.850 | 0.702 | 0.882 | 0.843 |
| 59 | 0.808 | 0.908 | 0.858 | 0.720 | 0.898 | 0.851 |
| 60 | 0.792 | 0.917 | 0.854 | 0.714 | 0.905 | 0.844 |
| 61 | 0.808 | 0.900 | 0.854 | 0.711 | 0.890 | 0.847 |
| 62 | 0.817 | 0.900 | 0.858 | 0.719 | 0.891 | 0.852 |
| 63 | 0.800 | 0.900 | 0.850 | 0.704 | 0.889 | 0.842 |
| 64 | 0.800 | 0.900 | 0.850 | 0.704 | 0.889 | 0.842 |
| 65 | 0.800 | 0.900 | 0.850 | 0.704 | 0.889 | 0.842 |
| 66 | 0.800 | 0.892 | 0.846 | 0.695 | 0.881 | 0.838 |
| 67 | 0.808 | 0.900 | 0.854 | 0.711 | 0.890 | 0.847 |
| 68 | 0.808 | 0.900 | 0.854 | 0.711 | 0.890 | 0.847 |
| 69 | 0.800 | 0.892 | 0.846 | 0.695 | 0.881 | 0.838 |
| 70 | 0.808 | 0.917 | 0.863 | 0.729 | 0.907 | 0.855 |
| 71 | 0.808 | 0.917 | 0.863 | 0.729 | 0.907 | 0.855 |
| 72 | 0.808 | 0.925 | 0.867 | 0.738 | 0.915 | 0.858 |
| 73 | 0.800 | 0.908 | 0.854 | 0.713 | 0.897 | 0.846 |
| 74 | 0.800 | 0.925 | 0.863 | 0.731 | 0.914 | 0.853 |
| 75 | 0.808 | 0.925 | 0.867 | 0.738 | 0.915 | 0.858 |
| 76 | 0.808 | 0.933 | 0.871 | 0.748 | 0.924 | 0.862 |
| 77 | 0.800 | 0.933 | 0.867 | 0.740 | 0.923 | 0.857 |

|     |       |       |       |       |       |       |
|-----|-------|-------|-------|-------|-------|-------|
| 78  | 0.800 | 0.933 | 0.867 | 0.740 | 0.923 | 0.857 |
| 79  | 0.800 | 0.933 | 0.867 | 0.740 | 0.923 | 0.857 |
| 80  | 0.800 | 0.933 | 0.867 | 0.740 | 0.923 | 0.857 |
| 81  | 0.800 | 0.933 | 0.867 | 0.740 | 0.923 | 0.857 |
| 82  | 0.800 | 0.933 | 0.867 | 0.740 | 0.923 | 0.857 |
| 83  | 0.800 | 0.933 | 0.867 | 0.740 | 0.923 | 0.857 |
| 84  | 0.808 | 0.942 | 0.875 | 0.757 | 0.933 | 0.866 |
| 85  | 0.808 | 0.942 | 0.875 | 0.757 | 0.933 | 0.866 |
| 86  | 0.808 | 0.950 | 0.879 | 0.766 | 0.942 | 0.870 |
| 87  | 0.800 | 0.950 | 0.875 | 0.759 | 0.941 | 0.865 |
| 88  | 0.800 | 0.950 | 0.875 | 0.759 | 0.941 | 0.865 |
| 89  | 0.800 | 0.950 | 0.875 | 0.759 | 0.941 | 0.865 |
| 90  | 0.800 | 0.950 | 0.875 | 0.759 | 0.941 | 0.865 |
| 91  | 0.792 | 0.942 | 0.867 | 0.742 | 0.931 | 0.856 |
| 92  | 0.800 | 0.950 | 0.875 | 0.759 | 0.941 | 0.865 |
| 93  | 0.800 | 0.950 | 0.875 | 0.759 | 0.941 | 0.865 |
| 94  | 0.800 | 0.958 | 0.879 | 0.768 | 0.950 | 0.869 |
| 95  | 0.800 | 0.958 | 0.879 | 0.768 | 0.950 | 0.869 |
| 96  | 0.800 | 0.958 | 0.879 | 0.768 | 0.950 | 0.869 |
| 97  | 0.800 | 0.958 | 0.879 | 0.768 | 0.950 | 0.869 |
| 98  | 0.808 | 0.933 | 0.871 | 0.748 | 0.924 | 0.862 |
| 99  | 0.808 | 0.933 | 0.871 | 0.748 | 0.924 | 0.862 |
| 100 | 0.800 | 0.942 | 0.871 | 0.749 | 0.932 | 0.861 |
| 101 | 0.817 | 0.942 | 0.879 | 0.764 | 0.933 | 0.871 |
| 102 | 0.817 | 0.942 | 0.879 | 0.764 | 0.933 | 0.871 |
| 103 | 0.817 | 0.942 | 0.879 | 0.764 | 0.933 | 0.871 |
| 104 | 0.817 | 0.942 | 0.879 | 0.764 | 0.933 | 0.871 |
| 105 | 0.817 | 0.942 | 0.879 | 0.764 | 0.933 | 0.871 |
| 106 | 0.817 | 0.933 | 0.875 | 0.755 | 0.925 | 0.867 |
| 107 | 0.817 | 0.933 | 0.875 | 0.755 | 0.925 | 0.867 |
| 108 | 0.817 | 0.942 | 0.879 | 0.764 | 0.933 | 0.871 |
| 109 | 0.825 | 0.942 | 0.883 | 0.772 | 0.934 | 0.876 |
| 110 | 0.825 | 0.942 | 0.883 | 0.772 | 0.934 | 0.876 |
| 111 | 0.825 | 0.942 | 0.883 | 0.772 | 0.934 | 0.876 |
| 112 | 0.825 | 0.950 | 0.888 | 0.781 | 0.943 | 0.880 |
| 113 | 0.825 | 0.950 | 0.888 | 0.781 | 0.943 | 0.880 |
| 114 | 0.825 | 0.958 | 0.892 | 0.790 | 0.952 | 0.884 |
| 115 | 0.825 | 0.950 | 0.888 | 0.781 | 0.943 | 0.880 |
| 116 | 0.825 | 0.933 | 0.879 | 0.763 | 0.925 | 0.872 |
| 117 | 0.825 | 0.933 | 0.879 | 0.763 | 0.925 | 0.872 |
| 118 | 0.825 | 0.933 | 0.879 | 0.763 | 0.925 | 0.872 |
| 119 | 0.825 | 0.925 | 0.875 | 0.754 | 0.917 | 0.868 |

|     |       |       |       |       |       |       |
|-----|-------|-------|-------|-------|-------|-------|
| 120 | 0.817 | 0.933 | 0.875 | 0.755 | 0.925 | 0.867 |
| 121 | 0.817 | 0.933 | 0.875 | 0.755 | 0.925 | 0.867 |
| 122 | 0.825 | 0.950 | 0.888 | 0.781 | 0.943 | 0.880 |
| 123 | 0.825 | 0.958 | 0.892 | 0.790 | 0.952 | 0.884 |
| 124 | 0.825 | 0.950 | 0.888 | 0.781 | 0.943 | 0.880 |
| 125 | 0.825 | 0.933 | 0.879 | 0.763 | 0.925 | 0.872 |
| 126 | 0.825 | 0.933 | 0.879 | 0.763 | 0.925 | 0.872 |
| 127 | 0.825 | 0.942 | 0.883 | 0.772 | 0.934 | 0.876 |
| 128 | 0.825 | 0.942 | 0.883 | 0.772 | 0.934 | 0.876 |
| 129 | 0.817 | 0.942 | 0.879 | 0.764 | 0.933 | 0.871 |
| 130 | 0.817 | 0.933 | 0.875 | 0.755 | 0.925 | 0.867 |
| 131 | 0.842 | 0.933 | 0.888 | 0.778 | 0.927 | 0.882 |
| 132 | 0.833 | 0.942 | 0.888 | 0.780 | 0.935 | 0.881 |
| 133 | 0.833 | 0.942 | 0.888 | 0.780 | 0.935 | 0.881 |
| 134 | 0.833 | 0.942 | 0.888 | 0.780 | 0.935 | 0.881 |
| 135 | 0.833 | 0.933 | 0.883 | 0.771 | 0.926 | 0.877 |
| 136 | 0.833 | 0.933 | 0.883 | 0.771 | 0.926 | 0.877 |
| 137 | 0.833 | 0.933 | 0.883 | 0.771 | 0.926 | 0.877 |
| 138 | 0.833 | 0.942 | 0.888 | 0.780 | 0.935 | 0.881 |
| 139 | 0.833 | 0.933 | 0.883 | 0.771 | 0.926 | 0.877 |
| 140 | 0.833 | 0.933 | 0.883 | 0.771 | 0.926 | 0.877 |
| 141 | 0.825 | 0.942 | 0.883 | 0.772 | 0.934 | 0.876 |
| 142 | 0.825 | 0.950 | 0.888 | 0.781 | 0.943 | 0.880 |
| 143 | 0.833 | 0.933 | 0.883 | 0.771 | 0.926 | 0.877 |
| 144 | 0.833 | 0.933 | 0.883 | 0.771 | 0.926 | 0.877 |
| 145 | 0.833 | 0.933 | 0.883 | 0.771 | 0.926 | 0.877 |
| 146 | 0.833 | 0.925 | 0.879 | 0.762 | 0.917 | 0.873 |
| 147 | 0.833 | 0.925 | 0.879 | 0.762 | 0.917 | 0.873 |
| 148 | 0.833 | 0.933 | 0.883 | 0.771 | 0.926 | 0.877 |
| 149 | 0.833 | 0.933 | 0.883 | 0.771 | 0.926 | 0.877 |
| 150 | 0.833 | 0.933 | 0.883 | 0.771 | 0.926 | 0.877 |
| 151 | 0.833 | 0.933 | 0.883 | 0.771 | 0.926 | 0.877 |
| 152 | 0.833 | 0.933 | 0.883 | 0.771 | 0.926 | 0.877 |
| 153 | 0.833 | 0.933 | 0.883 | 0.771 | 0.926 | 0.877 |
| 154 | 0.833 | 0.942 | 0.888 | 0.780 | 0.935 | 0.881 |
| 155 | 0.833 | 0.925 | 0.879 | 0.762 | 0.917 | 0.873 |
| 156 | 0.833 | 0.933 | 0.883 | 0.771 | 0.926 | 0.877 |
| 157 | 0.833 | 0.933 | 0.883 | 0.771 | 0.926 | 0.877 |
| 158 | 0.833 | 0.933 | 0.883 | 0.771 | 0.926 | 0.877 |
| 159 | 0.833 | 0.942 | 0.888 | 0.780 | 0.935 | 0.881 |
| 160 | 0.833 | 0.933 | 0.883 | 0.771 | 0.926 | 0.877 |
| 161 | 0.833 | 0.933 | 0.883 | 0.771 | 0.926 | 0.877 |

|     |       |       |       |       |       |       |
|-----|-------|-------|-------|-------|-------|-------|
| 162 | 0.833 | 0.917 | 0.875 | 0.753 | 0.909 | 0.870 |
| 163 | 0.833 | 0.933 | 0.883 | 0.771 | 0.926 | 0.877 |
| 164 | 0.833 | 0.933 | 0.883 | 0.771 | 0.926 | 0.877 |
| 165 | 0.833 | 0.933 | 0.883 | 0.771 | 0.926 | 0.877 |
| 166 | 0.833 | 0.942 | 0.888 | 0.780 | 0.935 | 0.881 |
| 167 | 0.833 | 0.942 | 0.888 | 0.780 | 0.935 | 0.881 |
| 168 | 0.833 | 0.942 | 0.888 | 0.780 | 0.935 | 0.881 |
| 169 | 0.833 | 0.933 | 0.883 | 0.771 | 0.926 | 0.877 |
| 170 | 0.833 | 0.942 | 0.888 | 0.780 | 0.935 | 0.881 |
| 171 | 0.833 | 0.925 | 0.879 | 0.762 | 0.917 | 0.873 |
| 172 | 0.833 | 0.925 | 0.879 | 0.762 | 0.917 | 0.873 |
| 173 | 0.833 | 0.925 | 0.879 | 0.762 | 0.917 | 0.873 |
| 174 | 0.833 | 0.933 | 0.883 | 0.771 | 0.926 | 0.877 |
| 175 | 0.833 | 0.942 | 0.888 | 0.780 | 0.935 | 0.881 |
| 176 | 0.833 | 0.942 | 0.888 | 0.780 | 0.935 | 0.881 |
| 177 | 0.833 | 0.942 | 0.888 | 0.780 | 0.935 | 0.881 |
| 178 | 0.833 | 0.942 | 0.888 | 0.780 | 0.935 | 0.881 |
| 179 | 0.833 | 0.942 | 0.888 | 0.780 | 0.935 | 0.881 |
| 180 | 0.825 | 0.942 | 0.883 | 0.772 | 0.934 | 0.876 |
| 181 | 0.825 | 0.942 | 0.883 | 0.772 | 0.934 | 0.876 |
| 182 | 0.825 | 0.942 | 0.883 | 0.772 | 0.934 | 0.876 |
| 183 | 0.825 | 0.942 | 0.883 | 0.772 | 0.934 | 0.876 |
| 184 | 0.825 | 0.942 | 0.883 | 0.772 | 0.934 | 0.876 |
| 185 | 0.825 | 0.942 | 0.883 | 0.772 | 0.934 | 0.876 |
| 186 | 0.825 | 0.942 | 0.883 | 0.772 | 0.934 | 0.876 |
| 187 | 0.825 | 0.942 | 0.883 | 0.772 | 0.934 | 0.876 |
| 188 | 0.833 | 0.933 | 0.883 | 0.771 | 0.926 | 0.877 |
| 189 | 0.825 | 0.942 | 0.883 | 0.772 | 0.934 | 0.876 |
| 190 | 0.825 | 0.942 | 0.883 | 0.772 | 0.934 | 0.876 |
| 191 | 0.825 | 0.942 | 0.883 | 0.772 | 0.934 | 0.876 |
| 192 | 0.825 | 0.942 | 0.883 | 0.772 | 0.934 | 0.876 |
| 193 | 0.825 | 0.942 | 0.883 | 0.772 | 0.934 | 0.876 |
| 194 | 0.825 | 0.933 | 0.879 | 0.763 | 0.925 | 0.872 |
| 195 | 0.825 | 0.942 | 0.883 | 0.772 | 0.934 | 0.876 |
| 196 | 0.825 | 0.933 | 0.879 | 0.763 | 0.925 | 0.872 |
| 197 | 0.825 | 0.933 | 0.879 | 0.763 | 0.925 | 0.872 |
| 198 | 0.825 | 0.925 | 0.875 | 0.754 | 0.917 | 0.868 |
| 199 | 0.825 | 0.917 | 0.871 | 0.745 | 0.908 | 0.865 |
| 200 | 0.825 | 0.917 | 0.871 | 0.745 | 0.908 | 0.865 |
| 201 | 0.825 | 0.917 | 0.871 | 0.745 | 0.908 | 0.865 |
| 202 | 0.825 | 0.917 | 0.871 | 0.745 | 0.908 | 0.865 |
| 203 | 0.825 | 0.917 | 0.871 | 0.745 | 0.908 | 0.865 |

|     |       |       |       |       |       |       |
|-----|-------|-------|-------|-------|-------|-------|
| 204 | 0.825 | 0.925 | 0.875 | 0.754 | 0.917 | 0.868 |
| 205 | 0.825 | 0.925 | 0.875 | 0.754 | 0.917 | 0.868 |
| 206 | 0.825 | 0.925 | 0.875 | 0.754 | 0.917 | 0.868 |
| 207 | 0.825 | 0.925 | 0.875 | 0.754 | 0.917 | 0.868 |
| 208 | 0.825 | 0.925 | 0.875 | 0.754 | 0.917 | 0.868 |
| 209 | 0.825 | 0.925 | 0.875 | 0.754 | 0.917 | 0.868 |
| 210 | 0.825 | 0.925 | 0.875 | 0.754 | 0.917 | 0.868 |
| 211 | 0.825 | 0.917 | 0.871 | 0.745 | 0.908 | 0.865 |
| 212 | 0.825 | 0.917 | 0.871 | 0.745 | 0.908 | 0.865 |
| 213 | 0.825 | 0.925 | 0.875 | 0.754 | 0.917 | 0.868 |
| 214 | 0.825 | 0.925 | 0.875 | 0.754 | 0.917 | 0.868 |
| 215 | 0.825 | 0.925 | 0.875 | 0.754 | 0.917 | 0.868 |
| 216 | 0.825 | 0.925 | 0.875 | 0.754 | 0.917 | 0.868 |
| 217 | 0.825 | 0.925 | 0.875 | 0.754 | 0.917 | 0.868 |
| 218 | 0.825 | 0.925 | 0.875 | 0.754 | 0.917 | 0.868 |
| 219 | 0.825 | 0.925 | 0.875 | 0.754 | 0.917 | 0.868 |
| 220 | 0.817 | 0.925 | 0.871 | 0.746 | 0.916 | 0.863 |
| 221 | 0.817 | 0.925 | 0.871 | 0.746 | 0.916 | 0.863 |
| 222 | 0.817 | 0.925 | 0.871 | 0.746 | 0.916 | 0.863 |
| 223 | 0.817 | 0.925 | 0.871 | 0.746 | 0.916 | 0.863 |
| 224 | 0.817 | 0.925 | 0.871 | 0.746 | 0.916 | 0.863 |
| 225 | 0.817 | 0.917 | 0.867 | 0.737 | 0.907 | 0.860 |
| 226 | 0.817 | 0.917 | 0.867 | 0.737 | 0.907 | 0.860 |
| 227 | 0.817 | 0.925 | 0.871 | 0.746 | 0.916 | 0.863 |
| 228 | 0.817 | 0.917 | 0.867 | 0.737 | 0.907 | 0.860 |
| 229 | 0.817 | 0.917 | 0.867 | 0.737 | 0.907 | 0.860 |
| 230 | 0.817 | 0.917 | 0.867 | 0.737 | 0.907 | 0.860 |
| 231 | 0.817 | 0.917 | 0.867 | 0.737 | 0.907 | 0.860 |
| 232 | 0.817 | 0.908 | 0.863 | 0.728 | 0.899 | 0.856 |
| 233 | 0.817 | 0.908 | 0.863 | 0.728 | 0.899 | 0.856 |
| 234 | 0.825 | 0.908 | 0.867 | 0.736 | 0.900 | 0.861 |
| 235 | 0.825 | 0.917 | 0.871 | 0.745 | 0.908 | 0.865 |
| 236 | 0.825 | 0.908 | 0.867 | 0.736 | 0.900 | 0.861 |
| 237 | 0.825 | 0.925 | 0.875 | 0.754 | 0.917 | 0.868 |
| 238 | 0.825 | 0.917 | 0.871 | 0.745 | 0.908 | 0.865 |
| 239 | 0.825 | 0.925 | 0.875 | 0.754 | 0.917 | 0.868 |
| 240 | 0.825 | 0.925 | 0.875 | 0.754 | 0.917 | 0.868 |
| 241 | 0.825 | 0.925 | 0.875 | 0.754 | 0.917 | 0.868 |
| 242 | 0.825 | 0.925 | 0.875 | 0.754 | 0.917 | 0.868 |
| 243 | 0.825 | 0.925 | 0.875 | 0.754 | 0.917 | 0.868 |
| 244 | 0.825 | 0.925 | 0.875 | 0.754 | 0.917 | 0.868 |
| 245 | 0.825 | 0.942 | 0.883 | 0.772 | 0.934 | 0.876 |

|     |       |       |       |       |       |       |
|-----|-------|-------|-------|-------|-------|-------|
| 246 | 0.825 | 0.933 | 0.879 | 0.763 | 0.925 | 0.872 |
| 247 | 0.825 | 0.933 | 0.879 | 0.763 | 0.925 | 0.872 |
| 248 | 0.825 | 0.933 | 0.879 | 0.763 | 0.925 | 0.872 |
| 249 | 0.825 | 0.933 | 0.879 | 0.763 | 0.925 | 0.872 |
| 250 | 0.808 | 0.925 | 0.867 | 0.738 | 0.915 | 0.858 |
| 251 | 0.808 | 0.925 | 0.867 | 0.738 | 0.915 | 0.858 |
| 252 | 0.817 | 0.925 | 0.871 | 0.746 | 0.916 | 0.863 |
| 253 | 0.817 | 0.925 | 0.871 | 0.746 | 0.916 | 0.863 |
| 254 | 0.817 | 0.925 | 0.871 | 0.746 | 0.916 | 0.863 |
| 255 | 0.817 | 0.925 | 0.871 | 0.746 | 0.916 | 0.863 |
| 256 | 0.817 | 0.925 | 0.871 | 0.746 | 0.916 | 0.863 |
| 257 | 0.817 | 0.925 | 0.871 | 0.746 | 0.916 | 0.863 |
| 258 | 0.817 | 0.925 | 0.871 | 0.746 | 0.916 | 0.863 |
| 259 | 0.817 | 0.925 | 0.871 | 0.746 | 0.916 | 0.863 |
| 260 | 0.817 | 0.933 | 0.875 | 0.755 | 0.925 | 0.867 |
| 261 | 0.817 | 0.933 | 0.875 | 0.755 | 0.925 | 0.867 |
| 262 | 0.825 | 0.925 | 0.875 | 0.754 | 0.917 | 0.868 |
| 263 | 0.825 | 0.925 | 0.875 | 0.754 | 0.917 | 0.868 |
| 264 | 0.825 | 0.925 | 0.875 | 0.754 | 0.917 | 0.868 |
| 265 | 0.825 | 0.925 | 0.875 | 0.754 | 0.917 | 0.868 |
| 266 | 0.825 | 0.925 | 0.875 | 0.754 | 0.917 | 0.868 |
| 267 | 0.825 | 0.925 | 0.875 | 0.754 | 0.917 | 0.868 |
| 268 | 0.825 | 0.925 | 0.875 | 0.754 | 0.917 | 0.868 |
| 269 | 0.817 | 0.925 | 0.871 | 0.746 | 0.916 | 0.863 |
| 270 | 0.817 | 0.917 | 0.867 | 0.737 | 0.907 | 0.860 |
| 271 | 0.825 | 0.925 | 0.875 | 0.754 | 0.917 | 0.868 |
| 272 | 0.825 | 0.925 | 0.875 | 0.754 | 0.917 | 0.868 |
| 273 | 0.825 | 0.917 | 0.871 | 0.745 | 0.908 | 0.865 |
| 274 | 0.817 | 0.917 | 0.867 | 0.737 | 0.907 | 0.860 |
| 275 | 0.817 | 0.925 | 0.871 | 0.746 | 0.916 | 0.863 |
| 276 | 0.817 | 0.925 | 0.871 | 0.746 | 0.916 | 0.863 |
| 277 | 0.817 | 0.925 | 0.871 | 0.746 | 0.916 | 0.863 |
| 278 | 0.817 | 0.925 | 0.871 | 0.746 | 0.916 | 0.863 |
| 279 | 0.825 | 0.925 | 0.875 | 0.754 | 0.917 | 0.868 |
| 280 | 0.825 | 0.925 | 0.875 | 0.754 | 0.917 | 0.868 |
| 281 | 0.825 | 0.917 | 0.871 | 0.745 | 0.908 | 0.865 |
| 282 | 0.825 | 0.900 | 0.863 | 0.727 | 0.892 | 0.857 |
| 283 | 0.833 | 0.892 | 0.863 | 0.726 | 0.885 | 0.858 |
| 284 | 0.825 | 0.892 | 0.858 | 0.718 | 0.884 | 0.853 |
| 285 | 0.825 | 0.900 | 0.863 | 0.727 | 0.892 | 0.857 |
| 286 | 0.817 | 0.892 | 0.854 | 0.710 | 0.883 | 0.848 |
| 287 | 0.817 | 0.900 | 0.858 | 0.719 | 0.891 | 0.852 |



|     |       |       |       |       |       |       |
|-----|-------|-------|-------|-------|-------|-------|
| 288 | 0.817 | 0.908 | 0.863 | 0.728 | 0.899 | 0.856 |
| 289 | 0.817 | 0.908 | 0.863 | 0.728 | 0.899 | 0.856 |
| 290 | 0.825 | 0.917 | 0.871 | 0.745 | 0.908 | 0.865 |
| 291 | 0.825 | 0.908 | 0.867 | 0.736 | 0.900 | 0.861 |
| 292 | 0.825 | 0.908 | 0.867 | 0.736 | 0.900 | 0.861 |
| 293 | 0.825 | 0.908 | 0.867 | 0.736 | 0.900 | 0.861 |
| 294 | 0.825 | 0.908 | 0.867 | 0.736 | 0.900 | 0.861 |
| 295 | 0.825 | 0.917 | 0.871 | 0.745 | 0.908 | 0.865 |
| 296 | 0.825 | 0.917 | 0.871 | 0.745 | 0.908 | 0.865 |
| 297 | 0.825 | 0.917 | 0.871 | 0.745 | 0.908 | 0.865 |
| 298 | 0.825 | 0.917 | 0.871 | 0.745 | 0.908 | 0.865 |
| 299 | 0.817 | 0.917 | 0.867 | 0.737 | 0.907 | 0.860 |
| 300 | 0.817 | 0.917 | 0.867 | 0.737 | 0.907 | 0.860 |
| 301 | 0.825 | 0.917 | 0.871 | 0.745 | 0.908 | 0.865 |
| 302 | 0.825 | 0.917 | 0.871 | 0.745 | 0.908 | 0.865 |
| 303 | 0.825 | 0.917 | 0.871 | 0.745 | 0.908 | 0.865 |
| 304 | 0.825 | 0.917 | 0.871 | 0.745 | 0.908 | 0.865 |
| 305 | 0.825 | 0.917 | 0.871 | 0.745 | 0.908 | 0.865 |
| 306 | 0.825 | 0.917 | 0.871 | 0.745 | 0.908 | 0.865 |
| 307 | 0.825 | 0.917 | 0.871 | 0.745 | 0.908 | 0.865 |
| 308 | 0.825 | 0.917 | 0.871 | 0.745 | 0.908 | 0.865 |
| 309 | 0.825 | 0.883 | 0.854 | 0.710 | 0.876 | 0.850 |
| 310 | 0.817 | 0.883 | 0.850 | 0.702 | 0.875 | 0.845 |
| 311 | 0.817 | 0.883 | 0.850 | 0.702 | 0.875 | 0.845 |
| 312 | 0.817 | 0.892 | 0.854 | 0.710 | 0.883 | 0.848 |
| 313 | 0.817 | 0.900 | 0.858 | 0.719 | 0.891 | 0.852 |
| 314 | 0.817 | 0.900 | 0.858 | 0.719 | 0.891 | 0.852 |
| 315 | 0.817 | 0.900 | 0.858 | 0.719 | 0.891 | 0.852 |
| 316 | 0.817 | 0.900 | 0.858 | 0.719 | 0.891 | 0.852 |
| 317 | 0.825 | 0.900 | 0.863 | 0.727 | 0.892 | 0.857 |
| 318 | 0.817 | 0.892 | 0.854 | 0.710 | 0.883 | 0.848 |
| 319 | 0.817 | 0.892 | 0.854 | 0.710 | 0.883 | 0.848 |
| 320 | 0.817 | 0.892 | 0.854 | 0.710 | 0.883 | 0.848 |
| 321 | 0.817 | 0.900 | 0.858 | 0.719 | 0.891 | 0.852 |
| 322 | 0.817 | 0.900 | 0.858 | 0.719 | 0.891 | 0.852 |
| 323 | 0.817 | 0.900 | 0.858 | 0.719 | 0.891 | 0.852 |
| 324 | 0.817 | 0.892 | 0.854 | 0.710 | 0.883 | 0.848 |
| 325 | 0.817 | 0.892 | 0.854 | 0.710 | 0.883 | 0.848 |
| 326 | 0.817 | 0.892 | 0.854 | 0.710 | 0.883 | 0.848 |
| 327 | 0.817 | 0.892 | 0.854 | 0.710 | 0.883 | 0.848 |
| 328 | 0.817 | 0.892 | 0.854 | 0.710 | 0.883 | 0.848 |
| 329 | 0.817 | 0.892 | 0.854 | 0.710 | 0.883 | 0.848 |

|     |       |       |       |       |       |       |
|-----|-------|-------|-------|-------|-------|-------|
| 330 | 0.817 | 0.892 | 0.854 | 0.710 | 0.883 | 0.848 |
| 331 | 0.817 | 0.892 | 0.854 | 0.710 | 0.883 | 0.848 |
| 332 | 0.833 | 0.900 | 0.867 | 0.735 | 0.893 | 0.862 |
| 333 | 0.833 | 0.900 | 0.867 | 0.735 | 0.893 | 0.862 |
| 334 | 0.833 | 0.900 | 0.867 | 0.735 | 0.893 | 0.862 |
| 335 | 0.833 | 0.908 | 0.871 | 0.744 | 0.901 | 0.866 |
| 336 | 0.833 | 0.908 | 0.871 | 0.744 | 0.901 | 0.866 |
| 337 | 0.833 | 0.908 | 0.871 | 0.744 | 0.901 | 0.866 |
| 338 | 0.825 | 0.900 | 0.863 | 0.727 | 0.892 | 0.857 |
| 339 | 0.825 | 0.892 | 0.858 | 0.718 | 0.884 | 0.853 |
| 340 | 0.825 | 0.892 | 0.858 | 0.718 | 0.884 | 0.853 |
| 341 | 0.825 | 0.908 | 0.867 | 0.736 | 0.900 | 0.861 |
| 342 | 0.825 | 0.908 | 0.867 | 0.736 | 0.900 | 0.861 |
| 343 | 0.825 | 0.900 | 0.863 | 0.727 | 0.892 | 0.857 |
| 344 | 0.817 | 0.908 | 0.863 | 0.728 | 0.899 | 0.856 |
| 345 | 0.817 | 0.908 | 0.863 | 0.728 | 0.899 | 0.856 |
| 346 | 0.817 | 0.908 | 0.863 | 0.728 | 0.899 | 0.856 |
| 347 | 0.825 | 0.908 | 0.867 | 0.736 | 0.900 | 0.861 |
| 348 | 0.825 | 0.908 | 0.867 | 0.736 | 0.900 | 0.861 |
| 349 | 0.825 | 0.917 | 0.871 | 0.745 | 0.908 | 0.865 |
| 350 | 0.817 | 0.917 | 0.867 | 0.737 | 0.907 | 0.860 |
| 351 | 0.817 | 0.925 | 0.871 | 0.746 | 0.916 | 0.863 |
| 352 | 0.817 | 0.925 | 0.871 | 0.746 | 0.916 | 0.863 |
| 353 | 0.825 | 0.925 | 0.875 | 0.754 | 0.917 | 0.868 |
| 354 | 0.817 | 0.925 | 0.871 | 0.746 | 0.916 | 0.863 |
| 355 | 0.817 | 0.925 | 0.871 | 0.746 | 0.916 | 0.863 |
| 356 | 0.817 | 0.925 | 0.871 | 0.746 | 0.916 | 0.863 |
| 357 | 0.825 | 0.917 | 0.871 | 0.745 | 0.908 | 0.865 |
| 358 | 0.825 | 0.917 | 0.871 | 0.745 | 0.908 | 0.865 |
| 359 | 0.825 | 0.917 | 0.871 | 0.745 | 0.908 | 0.865 |
| 360 | 0.825 | 0.917 | 0.871 | 0.745 | 0.908 | 0.865 |
| 361 | 0.825 | 0.917 | 0.871 | 0.745 | 0.908 | 0.865 |
| 362 | 0.825 | 0.917 | 0.871 | 0.745 | 0.908 | 0.865 |
| 363 | 0.817 | 0.917 | 0.867 | 0.737 | 0.907 | 0.860 |
| 364 | 0.817 | 0.917 | 0.867 | 0.737 | 0.907 | 0.860 |
| 365 | 0.817 | 0.917 | 0.867 | 0.737 | 0.907 | 0.860 |
| 366 | 0.817 | 0.917 | 0.867 | 0.737 | 0.907 | 0.860 |
| 367 | 0.817 | 0.917 | 0.867 | 0.737 | 0.907 | 0.860 |
| 368 | 0.817 | 0.917 | 0.867 | 0.737 | 0.907 | 0.860 |
| 369 | 0.817 | 0.917 | 0.867 | 0.737 | 0.907 | 0.860 |
| 370 | 0.817 | 0.908 | 0.863 | 0.728 | 0.899 | 0.856 |
| 371 | 0.825 | 0.908 | 0.867 | 0.736 | 0.900 | 0.861 |

|     |       |       |       |       |       |       |
|-----|-------|-------|-------|-------|-------|-------|
| 372 | 0.817 | 0.908 | 0.863 | 0.728 | 0.899 | 0.856 |
| 373 | 0.825 | 0.908 | 0.867 | 0.736 | 0.900 | 0.861 |
| 374 | 0.817 | 0.917 | 0.867 | 0.737 | 0.907 | 0.860 |
| 375 | 0.817 | 0.917 | 0.867 | 0.737 | 0.907 | 0.860 |
| 376 | 0.817 | 0.917 | 0.867 | 0.737 | 0.907 | 0.860 |
| 377 | 0.825 | 0.917 | 0.871 | 0.745 | 0.908 | 0.865 |
| 378 | 0.825 | 0.917 | 0.871 | 0.745 | 0.908 | 0.865 |
| 379 | 0.833 | 0.917 | 0.875 | 0.753 | 0.909 | 0.870 |
| 380 | 0.833 | 0.917 | 0.875 | 0.753 | 0.909 | 0.870 |
| 381 | 0.833 | 0.917 | 0.875 | 0.753 | 0.909 | 0.870 |
| 382 | 0.833 | 0.917 | 0.875 | 0.753 | 0.909 | 0.870 |
| 383 | 0.833 | 0.917 | 0.875 | 0.753 | 0.909 | 0.870 |
| 384 | 0.825 | 0.917 | 0.871 | 0.745 | 0.908 | 0.865 |
| 385 | 0.825 | 0.917 | 0.871 | 0.745 | 0.908 | 0.865 |
| 386 | 0.833 | 0.917 | 0.875 | 0.753 | 0.909 | 0.870 |
| 387 | 0.833 | 0.917 | 0.875 | 0.753 | 0.909 | 0.870 |
| 388 | 0.833 | 0.908 | 0.871 | 0.744 | 0.901 | 0.866 |
| 389 | 0.825 | 0.917 | 0.871 | 0.745 | 0.908 | 0.865 |
| 390 | 0.825 | 0.908 | 0.867 | 0.736 | 0.900 | 0.861 |
| 391 | 0.825 | 0.908 | 0.867 | 0.736 | 0.900 | 0.861 |
| 392 | 0.825 | 0.917 | 0.871 | 0.745 | 0.908 | 0.865 |
| 393 | 0.825 | 0.917 | 0.871 | 0.745 | 0.908 | 0.865 |
| 394 | 0.825 | 0.917 | 0.871 | 0.745 | 0.908 | 0.865 |
| 395 | 0.825 | 0.908 | 0.867 | 0.736 | 0.900 | 0.861 |
| 396 | 0.825 | 0.908 | 0.867 | 0.736 | 0.900 | 0.861 |
| 397 | 0.825 | 0.908 | 0.867 | 0.736 | 0.900 | 0.861 |
| 398 | 0.825 | 0.908 | 0.867 | 0.736 | 0.900 | 0.861 |
| 399 | 0.825 | 0.917 | 0.871 | 0.745 | 0.908 | 0.865 |
| 400 | 0.825 | 0.908 | 0.867 | 0.736 | 0.900 | 0.861 |
| 401 | 0.825 | 0.908 | 0.867 | 0.736 | 0.900 | 0.861 |
| 402 | 0.825 | 0.908 | 0.867 | 0.736 | 0.900 | 0.861 |
| 403 | 0.825 | 0.908 | 0.867 | 0.736 | 0.900 | 0.861 |
| 404 | 0.825 | 0.908 | 0.867 | 0.736 | 0.900 | 0.861 |
| 405 | 0.825 | 0.908 | 0.867 | 0.736 | 0.900 | 0.861 |
| 406 | 0.825 | 0.908 | 0.867 | 0.736 | 0.900 | 0.861 |
| 407 | 0.825 | 0.908 | 0.867 | 0.736 | 0.900 | 0.861 |
| 408 | 0.817 | 0.908 | 0.863 | 0.728 | 0.899 | 0.856 |
| 409 | 0.817 | 0.908 | 0.863 | 0.728 | 0.899 | 0.856 |
| 410 | 0.817 | 0.908 | 0.863 | 0.728 | 0.899 | 0.856 |
| 411 | 0.817 | 0.908 | 0.863 | 0.728 | 0.899 | 0.856 |
| 412 | 0.817 | 0.908 | 0.863 | 0.728 | 0.899 | 0.856 |
| 413 | 0.817 | 0.908 | 0.863 | 0.728 | 0.899 | 0.856 |

|     |       |       |       |       |       |       |
|-----|-------|-------|-------|-------|-------|-------|
| 414 | 0.817 | 0.908 | 0.863 | 0.728 | 0.899 | 0.856 |
| 415 | 0.817 | 0.908 | 0.863 | 0.728 | 0.899 | 0.856 |
| 416 | 0.817 | 0.908 | 0.863 | 0.728 | 0.899 | 0.856 |
| 417 | 0.817 | 0.900 | 0.858 | 0.719 | 0.891 | 0.852 |
| 418 | 0.817 | 0.900 | 0.858 | 0.719 | 0.891 | 0.852 |
| 419 | 0.817 | 0.900 | 0.858 | 0.719 | 0.891 | 0.852 |
| 420 | 0.817 | 0.900 | 0.858 | 0.719 | 0.891 | 0.852 |
| 421 | 0.817 | 0.900 | 0.858 | 0.719 | 0.891 | 0.852 |
| 422 | 0.817 | 0.908 | 0.863 | 0.728 | 0.899 | 0.856 |
| 423 | 0.825 | 0.908 | 0.867 | 0.736 | 0.900 | 0.861 |
| 424 | 0.825 | 0.900 | 0.863 | 0.727 | 0.892 | 0.857 |
| 425 | 0.825 | 0.908 | 0.867 | 0.736 | 0.900 | 0.861 |
| 426 | 0.817 | 0.908 | 0.863 | 0.728 | 0.899 | 0.856 |
| 427 | 0.817 | 0.908 | 0.863 | 0.728 | 0.899 | 0.856 |
| 428 | 0.825 | 0.908 | 0.867 | 0.736 | 0.900 | 0.861 |
| 429 | 0.825 | 0.908 | 0.867 | 0.736 | 0.900 | 0.861 |
| 430 | 0.825 | 0.917 | 0.871 | 0.745 | 0.908 | 0.865 |
| 431 | 0.825 | 0.917 | 0.871 | 0.745 | 0.908 | 0.865 |
| 432 | 0.825 | 0.917 | 0.871 | 0.745 | 0.908 | 0.865 |
| 433 | 0.825 | 0.917 | 0.871 | 0.745 | 0.908 | 0.865 |
| 434 | 0.825 | 0.917 | 0.871 | 0.745 | 0.908 | 0.865 |
| 435 | 0.825 | 0.917 | 0.871 | 0.745 | 0.908 | 0.865 |
| 436 | 0.825 | 0.917 | 0.871 | 0.745 | 0.908 | 0.865 |
| 437 | 0.825 | 0.917 | 0.871 | 0.745 | 0.908 | 0.865 |
| 438 | 0.825 | 0.917 | 0.871 | 0.745 | 0.908 | 0.865 |
| 439 | 0.825 | 0.908 | 0.867 | 0.736 | 0.900 | 0.861 |
| 440 | 0.825 | 0.908 | 0.867 | 0.736 | 0.900 | 0.861 |
| 441 | 0.825 | 0.908 | 0.867 | 0.736 | 0.900 | 0.861 |
| 442 | 0.825 | 0.908 | 0.867 | 0.736 | 0.900 | 0.861 |
| 443 | 0.825 | 0.908 | 0.867 | 0.736 | 0.900 | 0.861 |
| 444 | 0.825 | 0.908 | 0.867 | 0.736 | 0.900 | 0.861 |
| 445 | 0.825 | 0.908 | 0.867 | 0.736 | 0.900 | 0.861 |
| 446 | 0.825 | 0.908 | 0.867 | 0.736 | 0.900 | 0.861 |
| 447 | 0.825 | 0.908 | 0.867 | 0.736 | 0.900 | 0.861 |
| 448 | 0.825 | 0.908 | 0.867 | 0.736 | 0.900 | 0.861 |
| 449 | 0.825 | 0.908 | 0.867 | 0.736 | 0.900 | 0.861 |
| 450 | 0.825 | 0.908 | 0.867 | 0.736 | 0.900 | 0.861 |
| 451 | 0.825 | 0.908 | 0.867 | 0.736 | 0.900 | 0.861 |
| 452 | 0.825 | 0.908 | 0.867 | 0.736 | 0.900 | 0.861 |
| 453 | 0.817 | 0.908 | 0.863 | 0.728 | 0.899 | 0.856 |
| 454 | 0.817 | 0.908 | 0.863 | 0.728 | 0.899 | 0.856 |
| 455 | 0.817 | 0.908 | 0.863 | 0.728 | 0.899 | 0.856 |

|     |       |       |       |       |       |       |
|-----|-------|-------|-------|-------|-------|-------|
| 456 | 0.825 | 0.908 | 0.867 | 0.736 | 0.900 | 0.861 |
| 457 | 0.825 | 0.908 | 0.867 | 0.736 | 0.900 | 0.861 |
| 458 | 0.825 | 0.908 | 0.867 | 0.736 | 0.900 | 0.861 |
| 459 | 0.825 | 0.908 | 0.867 | 0.736 | 0.900 | 0.861 |
| 460 | 0.825 | 0.900 | 0.863 | 0.727 | 0.892 | 0.857 |
| 461 | 0.825 | 0.900 | 0.863 | 0.727 | 0.892 | 0.857 |
| 462 | 0.817 | 0.917 | 0.867 | 0.737 | 0.907 | 0.860 |
| 463 | 0.817 | 0.917 | 0.867 | 0.737 | 0.907 | 0.860 |
| 464 | 0.817 | 0.917 | 0.867 | 0.737 | 0.907 | 0.860 |
| 465 | 0.817 | 0.908 | 0.863 | 0.728 | 0.899 | 0.856 |
| 466 | 0.817 | 0.908 | 0.863 | 0.728 | 0.899 | 0.856 |
| 467 | 0.817 | 0.908 | 0.863 | 0.728 | 0.899 | 0.856 |
| 468 | 0.817 | 0.908 | 0.863 | 0.728 | 0.899 | 0.856 |
| 469 | 0.817 | 0.900 | 0.858 | 0.719 | 0.891 | 0.852 |
| 470 | 0.825 | 0.917 | 0.871 | 0.745 | 0.908 | 0.865 |
| 471 | 0.817 | 0.925 | 0.871 | 0.746 | 0.916 | 0.863 |
| 472 | 0.817 | 0.925 | 0.871 | 0.746 | 0.916 | 0.863 |
| 473 | 0.817 | 0.925 | 0.871 | 0.746 | 0.916 | 0.863 |
| 474 | 0.817 | 0.925 | 0.871 | 0.746 | 0.916 | 0.863 |
| 475 | 0.817 | 0.908 | 0.863 | 0.728 | 0.899 | 0.856 |
| 476 | 0.817 | 0.908 | 0.863 | 0.728 | 0.899 | 0.856 |
| 477 | 0.817 | 0.908 | 0.863 | 0.728 | 0.899 | 0.856 |
| 478 | 0.817 | 0.908 | 0.863 | 0.728 | 0.899 | 0.856 |
| 479 | 0.817 | 0.908 | 0.863 | 0.728 | 0.899 | 0.856 |
| 480 | 0.817 | 0.917 | 0.867 | 0.737 | 0.907 | 0.860 |
| 481 | 0.817 | 0.917 | 0.867 | 0.737 | 0.907 | 0.860 |
| 482 | 0.817 | 0.917 | 0.867 | 0.737 | 0.907 | 0.860 |
| 483 | 0.817 | 0.917 | 0.867 | 0.737 | 0.907 | 0.860 |
| 484 | 0.817 | 0.917 | 0.867 | 0.737 | 0.907 | 0.860 |
| 485 | 0.817 | 0.917 | 0.867 | 0.737 | 0.907 | 0.860 |
| 486 | 0.817 | 0.917 | 0.867 | 0.737 | 0.907 | 0.860 |
| 487 | 0.817 | 0.917 | 0.867 | 0.737 | 0.907 | 0.860 |
| 488 | 0.817 | 0.917 | 0.867 | 0.737 | 0.907 | 0.860 |
| 489 | 0.817 | 0.917 | 0.867 | 0.737 | 0.907 | 0.860 |
| 490 | 0.817 | 0.917 | 0.867 | 0.737 | 0.907 | 0.860 |
| 491 | 0.817 | 0.917 | 0.867 | 0.737 | 0.907 | 0.860 |
| 492 | 0.817 | 0.917 | 0.867 | 0.737 | 0.907 | 0.860 |
| 493 | 0.817 | 0.917 | 0.867 | 0.737 | 0.907 | 0.860 |
| 494 | 0.817 | 0.917 | 0.867 | 0.737 | 0.907 | 0.860 |
| 495 | 0.817 | 0.917 | 0.867 | 0.737 | 0.907 | 0.860 |
| 496 | 0.817 | 0.908 | 0.863 | 0.728 | 0.899 | 0.856 |
| 497 | 0.817 | 0.917 | 0.867 | 0.737 | 0.907 | 0.860 |

|     |       |       |       |       |       |       |
|-----|-------|-------|-------|-------|-------|-------|
| 498 | 0.817 | 0.917 | 0.867 | 0.737 | 0.907 | 0.860 |
| 499 | 0.817 | 0.917 | 0.867 | 0.737 | 0.907 | 0.860 |
| 500 | 0.817 | 0.908 | 0.863 | 0.728 | 0.899 | 0.856 |
| 501 | 0.817 | 0.908 | 0.863 | 0.728 | 0.899 | 0.856 |
| 502 | 0.817 | 0.908 | 0.863 | 0.728 | 0.899 | 0.856 |
| 503 | 0.817 | 0.908 | 0.863 | 0.728 | 0.899 | 0.856 |
| 504 | 0.817 | 0.900 | 0.858 | 0.719 | 0.891 | 0.852 |
| 505 | 0.817 | 0.908 | 0.863 | 0.728 | 0.899 | 0.856 |
| 506 | 0.817 | 0.900 | 0.858 | 0.719 | 0.891 | 0.852 |
| 507 | 0.817 | 0.900 | 0.858 | 0.719 | 0.891 | 0.852 |
| 508 | 0.817 | 0.908 | 0.863 | 0.728 | 0.899 | 0.856 |
| 509 | 0.817 | 0.908 | 0.863 | 0.728 | 0.899 | 0.856 |
| 510 | 0.817 | 0.908 | 0.863 | 0.728 | 0.899 | 0.856 |
| 511 | 0.817 | 0.900 | 0.858 | 0.719 | 0.891 | 0.852 |
| 512 | 0.817 | 0.908 | 0.863 | 0.728 | 0.899 | 0.856 |
| 513 | 0.817 | 0.900 | 0.858 | 0.719 | 0.891 | 0.852 |
| 514 | 0.817 | 0.900 | 0.858 | 0.719 | 0.891 | 0.852 |
| 515 | 0.817 | 0.900 | 0.858 | 0.719 | 0.891 | 0.852 |
| 516 | 0.817 | 0.908 | 0.863 | 0.728 | 0.899 | 0.856 |
| 517 | 0.817 | 0.908 | 0.863 | 0.728 | 0.899 | 0.856 |
| 518 | 0.817 | 0.908 | 0.863 | 0.728 | 0.899 | 0.856 |
| 519 | 0.817 | 0.900 | 0.858 | 0.719 | 0.891 | 0.852 |
| 520 | 0.817 | 0.900 | 0.858 | 0.719 | 0.891 | 0.852 |
| 521 | 0.817 | 0.900 | 0.858 | 0.719 | 0.891 | 0.852 |
| 522 | 0.817 | 0.892 | 0.854 | 0.710 | 0.883 | 0.848 |
| 523 | 0.817 | 0.892 | 0.854 | 0.710 | 0.883 | 0.848 |
| 524 | 0.825 | 0.900 | 0.863 | 0.727 | 0.892 | 0.857 |
| 525 | 0.825 | 0.900 | 0.863 | 0.727 | 0.892 | 0.857 |
| 526 | 0.825 | 0.900 | 0.863 | 0.727 | 0.892 | 0.857 |
| 527 | 0.825 | 0.900 | 0.863 | 0.727 | 0.892 | 0.857 |
| 528 | 0.825 | 0.900 | 0.863 | 0.727 | 0.892 | 0.857 |
| 529 | 0.825 | 0.900 | 0.863 | 0.727 | 0.892 | 0.857 |
| 530 | 0.825 | 0.900 | 0.863 | 0.727 | 0.892 | 0.857 |
| 531 | 0.825 | 0.900 | 0.863 | 0.727 | 0.892 | 0.857 |
| 532 | 0.825 | 0.900 | 0.863 | 0.727 | 0.892 | 0.857 |
| 533 | 0.825 | 0.892 | 0.858 | 0.718 | 0.884 | 0.853 |
| 534 | 0.825 | 0.900 | 0.863 | 0.727 | 0.892 | 0.857 |
| 535 | 0.825 | 0.900 | 0.863 | 0.727 | 0.892 | 0.857 |
| 536 | 0.825 | 0.900 | 0.863 | 0.727 | 0.892 | 0.857 |
| 537 | 0.825 | 0.900 | 0.863 | 0.727 | 0.892 | 0.857 |
| 538 | 0.825 | 0.908 | 0.867 | 0.736 | 0.900 | 0.861 |
| 539 | 0.825 | 0.908 | 0.867 | 0.736 | 0.900 | 0.861 |

|     |       |       |       |       |       |       |
|-----|-------|-------|-------|-------|-------|-------|
| 540 | 0.825 | 0.908 | 0.867 | 0.736 | 0.900 | 0.861 |
| 541 | 0.825 | 0.908 | 0.867 | 0.736 | 0.900 | 0.861 |
| 542 | 0.825 | 0.908 | 0.867 | 0.736 | 0.900 | 0.861 |
| 543 | 0.825 | 0.908 | 0.867 | 0.736 | 0.900 | 0.861 |
| 544 | 0.825 | 0.908 | 0.867 | 0.736 | 0.900 | 0.861 |
| 545 | 0.825 | 0.908 | 0.867 | 0.736 | 0.900 | 0.861 |
| 546 | 0.825 | 0.892 | 0.858 | 0.718 | 0.884 | 0.853 |
| 547 | 0.825 | 0.892 | 0.858 | 0.718 | 0.884 | 0.853 |
| 548 | 0.825 | 0.900 | 0.863 | 0.727 | 0.892 | 0.857 |
| 549 | 0.825 | 0.892 | 0.858 | 0.718 | 0.884 | 0.853 |
| 550 | 0.825 | 0.892 | 0.858 | 0.718 | 0.884 | 0.853 |
| 551 | 0.825 | 0.900 | 0.863 | 0.727 | 0.892 | 0.857 |
| 552 | 0.825 | 0.892 | 0.858 | 0.718 | 0.884 | 0.853 |
| 553 | 0.825 | 0.892 | 0.858 | 0.718 | 0.884 | 0.853 |
| 554 | 0.825 | 0.900 | 0.863 | 0.727 | 0.892 | 0.857 |
| 555 | 0.825 | 0.892 | 0.858 | 0.718 | 0.884 | 0.853 |
| 556 | 0.825 | 0.892 | 0.858 | 0.718 | 0.884 | 0.853 |
| 557 | 0.817 | 0.892 | 0.854 | 0.710 | 0.883 | 0.848 |
| 558 | 0.817 | 0.892 | 0.854 | 0.710 | 0.883 | 0.848 |
| 559 | 0.817 | 0.892 | 0.854 | 0.710 | 0.883 | 0.848 |
| 560 | 0.817 | 0.892 | 0.854 | 0.710 | 0.883 | 0.848 |
| 561 | 0.825 | 0.892 | 0.858 | 0.718 | 0.884 | 0.853 |
| 562 | 0.817 | 0.892 | 0.854 | 0.710 | 0.883 | 0.848 |
| 563 | 0.817 | 0.892 | 0.854 | 0.710 | 0.883 | 0.848 |
| 564 | 0.817 | 0.892 | 0.854 | 0.710 | 0.883 | 0.848 |
| 565 | 0.817 | 0.892 | 0.854 | 0.710 | 0.883 | 0.848 |
| 566 | 0.817 | 0.883 | 0.850 | 0.702 | 0.875 | 0.845 |
| 567 | 0.817 | 0.892 | 0.854 | 0.710 | 0.883 | 0.848 |
| 568 | 0.817 | 0.892 | 0.854 | 0.710 | 0.883 | 0.848 |
| 569 | 0.817 | 0.892 | 0.854 | 0.710 | 0.883 | 0.848 |
| 570 | 0.817 | 0.892 | 0.854 | 0.710 | 0.883 | 0.848 |
| 571 | 0.817 | 0.892 | 0.854 | 0.710 | 0.883 | 0.848 |
| 572 | 0.817 | 0.892 | 0.854 | 0.710 | 0.883 | 0.848 |
| 573 | 0.817 | 0.883 | 0.850 | 0.702 | 0.875 | 0.845 |
| 574 | 0.825 | 0.892 | 0.858 | 0.718 | 0.884 | 0.853 |
| 575 | 0.817 | 0.892 | 0.854 | 0.710 | 0.883 | 0.848 |
| 576 | 0.817 | 0.892 | 0.854 | 0.710 | 0.883 | 0.848 |
| 577 | 0.817 | 0.892 | 0.854 | 0.710 | 0.883 | 0.848 |
| 578 | 0.825 | 0.892 | 0.858 | 0.718 | 0.884 | 0.853 |
| 579 | 0.825 | 0.892 | 0.858 | 0.718 | 0.884 | 0.853 |
| 580 | 0.825 | 0.892 | 0.858 | 0.718 | 0.884 | 0.853 |
| 581 | 0.825 | 0.900 | 0.863 | 0.727 | 0.892 | 0.857 |

|     |       |       |       |       |       |       |
|-----|-------|-------|-------|-------|-------|-------|
| 582 | 0.825 | 0.900 | 0.863 | 0.727 | 0.892 | 0.857 |
| 583 | 0.825 | 0.908 | 0.867 | 0.736 | 0.900 | 0.861 |
| 584 | 0.825 | 0.908 | 0.867 | 0.736 | 0.900 | 0.861 |
| 585 | 0.825 | 0.917 | 0.871 | 0.745 | 0.908 | 0.865 |
| 586 | 0.825 | 0.908 | 0.867 | 0.736 | 0.900 | 0.861 |
| 587 | 0.825 | 0.908 | 0.867 | 0.736 | 0.900 | 0.861 |
| 588 | 0.825 | 0.908 | 0.867 | 0.736 | 0.900 | 0.861 |
| 589 | 0.825 | 0.908 | 0.867 | 0.736 | 0.900 | 0.861 |
| 590 | 0.825 | 0.908 | 0.867 | 0.736 | 0.900 | 0.861 |
| 591 | 0.825 | 0.908 | 0.867 | 0.736 | 0.900 | 0.861 |
| 592 | 0.825 | 0.917 | 0.871 | 0.745 | 0.908 | 0.865 |
| 593 | 0.817 | 0.917 | 0.867 | 0.737 | 0.907 | 0.860 |
| 594 | 0.817 | 0.917 | 0.867 | 0.737 | 0.907 | 0.860 |
| 595 | 0.825 | 0.917 | 0.871 | 0.745 | 0.908 | 0.865 |
| 596 | 0.817 | 0.925 | 0.871 | 0.746 | 0.916 | 0.863 |
| 597 | 0.825 | 0.925 | 0.875 | 0.754 | 0.917 | 0.868 |
| 598 | 0.825 | 0.925 | 0.875 | 0.754 | 0.917 | 0.868 |
| 599 | 0.825 | 0.925 | 0.875 | 0.754 | 0.917 | 0.868 |
| 600 | 0.825 | 0.925 | 0.875 | 0.754 | 0.917 | 0.868 |
| 601 | 0.825 | 0.925 | 0.875 | 0.754 | 0.917 | 0.868 |
| 602 | 0.825 | 0.925 | 0.875 | 0.754 | 0.917 | 0.868 |
| 603 | 0.825 | 0.925 | 0.875 | 0.754 | 0.917 | 0.868 |
| 604 | 0.825 | 0.925 | 0.875 | 0.754 | 0.917 | 0.868 |
| 605 | 0.825 | 0.925 | 0.875 | 0.754 | 0.917 | 0.868 |
| 606 | 0.825 | 0.925 | 0.875 | 0.754 | 0.917 | 0.868 |
| 607 | 0.825 | 0.925 | 0.875 | 0.754 | 0.917 | 0.868 |
| 608 | 0.825 | 0.925 | 0.875 | 0.754 | 0.917 | 0.868 |
| 609 | 0.825 | 0.925 | 0.875 | 0.754 | 0.917 | 0.868 |
| 610 | 0.825 | 0.917 | 0.871 | 0.745 | 0.908 | 0.865 |
| 611 | 0.825 | 0.917 | 0.871 | 0.745 | 0.908 | 0.865 |
| 612 | 0.825 | 0.917 | 0.871 | 0.745 | 0.908 | 0.865 |
| 613 | 0.825 | 0.917 | 0.871 | 0.745 | 0.908 | 0.865 |
| 614 | 0.825 | 0.917 | 0.871 | 0.745 | 0.908 | 0.865 |
| 615 | 0.825 | 0.917 | 0.871 | 0.745 | 0.908 | 0.865 |
| 616 | 0.825 | 0.917 | 0.871 | 0.745 | 0.908 | 0.865 |
| 617 | 0.825 | 0.917 | 0.871 | 0.745 | 0.908 | 0.865 |
| 618 | 0.825 | 0.917 | 0.871 | 0.745 | 0.908 | 0.865 |
| 619 | 0.825 | 0.917 | 0.871 | 0.745 | 0.908 | 0.865 |
| 620 | 0.825 | 0.917 | 0.871 | 0.745 | 0.908 | 0.865 |
| 621 | 0.825 | 0.917 | 0.871 | 0.745 | 0.908 | 0.865 |
| 622 | 0.825 | 0.917 | 0.871 | 0.745 | 0.908 | 0.865 |
| 623 | 0.825 | 0.917 | 0.871 | 0.745 | 0.908 | 0.865 |



|     |       |       |       |       |       |       |
|-----|-------|-------|-------|-------|-------|-------|
| 624 | 0.825 | 0.917 | 0.871 | 0.745 | 0.908 | 0.865 |
| 625 | 0.825 | 0.917 | 0.871 | 0.745 | 0.908 | 0.865 |
| 626 | 0.825 | 0.917 | 0.871 | 0.745 | 0.908 | 0.865 |
| 627 | 0.825 | 0.917 | 0.871 | 0.745 | 0.908 | 0.865 |
| 628 | 0.825 | 0.917 | 0.871 | 0.745 | 0.908 | 0.865 |
| 629 | 0.825 | 0.917 | 0.871 | 0.745 | 0.908 | 0.865 |
| 630 | 0.825 | 0.917 | 0.871 | 0.745 | 0.908 | 0.865 |
| 631 | 0.825 | 0.917 | 0.871 | 0.745 | 0.908 | 0.865 |
| 632 | 0.825 | 0.917 | 0.871 | 0.745 | 0.908 | 0.865 |
| 633 | 0.825 | 0.917 | 0.871 | 0.745 | 0.908 | 0.865 |
| 634 | 0.825 | 0.917 | 0.871 | 0.745 | 0.908 | 0.865 |
| 635 | 0.825 | 0.917 | 0.871 | 0.745 | 0.908 | 0.865 |
| 636 | 0.825 | 0.908 | 0.867 | 0.736 | 0.900 | 0.861 |
| 637 | 0.825 | 0.908 | 0.867 | 0.736 | 0.900 | 0.861 |
| 638 | 0.825 | 0.917 | 0.871 | 0.745 | 0.908 | 0.865 |
| 639 | 0.825 | 0.917 | 0.871 | 0.745 | 0.908 | 0.865 |
| 640 | 0.825 | 0.917 | 0.871 | 0.745 | 0.908 | 0.865 |
| 641 | 0.825 | 0.917 | 0.871 | 0.745 | 0.908 | 0.865 |
| 642 | 0.825 | 0.917 | 0.871 | 0.745 | 0.908 | 0.865 |
| 643 | 0.825 | 0.917 | 0.871 | 0.745 | 0.908 | 0.865 |
| 644 | 0.825 | 0.925 | 0.875 | 0.754 | 0.917 | 0.868 |
| 645 | 0.825 | 0.925 | 0.875 | 0.754 | 0.917 | 0.868 |
| 646 | 0.825 | 0.917 | 0.871 | 0.745 | 0.908 | 0.865 |
| 647 | 0.825 | 0.925 | 0.875 | 0.754 | 0.917 | 0.868 |
| 648 | 0.825 | 0.925 | 0.875 | 0.754 | 0.917 | 0.868 |
| 649 | 0.825 | 0.917 | 0.871 | 0.745 | 0.908 | 0.865 |
| 650 | 0.825 | 0.917 | 0.871 | 0.745 | 0.908 | 0.865 |
| 651 | 0.825 | 0.917 | 0.871 | 0.745 | 0.908 | 0.865 |
| 652 | 0.825 | 0.917 | 0.871 | 0.745 | 0.908 | 0.865 |
| 653 | 0.825 | 0.908 | 0.867 | 0.736 | 0.900 | 0.861 |
| 654 | 0.825 | 0.917 | 0.871 | 0.745 | 0.908 | 0.865 |
| 655 | 0.825 | 0.917 | 0.871 | 0.745 | 0.908 | 0.865 |
| 656 | 0.825 | 0.917 | 0.871 | 0.745 | 0.908 | 0.865 |
| 657 | 0.825 | 0.917 | 0.871 | 0.745 | 0.908 | 0.865 |
| 658 | 0.825 | 0.925 | 0.875 | 0.754 | 0.917 | 0.868 |
| 659 | 0.825 | 0.908 | 0.867 | 0.736 | 0.900 | 0.861 |
| 660 | 0.825 | 0.908 | 0.867 | 0.736 | 0.900 | 0.861 |
| 661 | 0.825 | 0.908 | 0.867 | 0.736 | 0.900 | 0.861 |
| 662 | 0.825 | 0.908 | 0.867 | 0.736 | 0.900 | 0.861 |
| 663 | 0.825 | 0.908 | 0.867 | 0.736 | 0.900 | 0.861 |
| 664 | 0.825 | 0.908 | 0.867 | 0.736 | 0.900 | 0.861 |
| 665 | 0.825 | 0.908 | 0.867 | 0.736 | 0.900 | 0.861 |

|     |       |       |       |       |       |       |
|-----|-------|-------|-------|-------|-------|-------|
| 666 | 0.825 | 0.917 | 0.871 | 0.745 | 0.908 | 0.865 |
| 667 | 0.825 | 0.917 | 0.871 | 0.745 | 0.908 | 0.865 |
| 668 | 0.825 | 0.917 | 0.871 | 0.745 | 0.908 | 0.865 |
| 669 | 0.825 | 0.917 | 0.871 | 0.745 | 0.908 | 0.865 |
| 670 | 0.825 | 0.917 | 0.871 | 0.745 | 0.908 | 0.865 |
| 671 | 0.825 | 0.917 | 0.871 | 0.745 | 0.908 | 0.865 |
| 672 | 0.825 | 0.917 | 0.871 | 0.745 | 0.908 | 0.865 |
| 673 | 0.825 | 0.917 | 0.871 | 0.745 | 0.908 | 0.865 |
| 674 | 0.825 | 0.917 | 0.871 | 0.745 | 0.908 | 0.865 |
| 675 | 0.825 | 0.917 | 0.871 | 0.745 | 0.908 | 0.865 |
| 676 | 0.825 | 0.917 | 0.871 | 0.745 | 0.908 | 0.865 |
| 677 | 0.825 | 0.917 | 0.871 | 0.745 | 0.908 | 0.865 |
| 678 | 0.825 | 0.917 | 0.871 | 0.745 | 0.908 | 0.865 |
| 679 | 0.825 | 0.917 | 0.871 | 0.745 | 0.908 | 0.865 |
| 680 | 0.825 | 0.917 | 0.871 | 0.745 | 0.908 | 0.865 |
| 681 | 0.825 | 0.917 | 0.871 | 0.745 | 0.908 | 0.865 |
| 682 | 0.825 | 0.917 | 0.871 | 0.745 | 0.908 | 0.865 |
| 683 | 0.825 | 0.917 | 0.871 | 0.745 | 0.908 | 0.865 |
| 684 | 0.825 | 0.917 | 0.871 | 0.745 | 0.908 | 0.865 |
| 685 | 0.825 | 0.917 | 0.871 | 0.745 | 0.908 | 0.865 |
| 686 | 0.825 | 0.908 | 0.867 | 0.736 | 0.900 | 0.861 |
| 687 | 0.825 | 0.917 | 0.871 | 0.745 | 0.908 | 0.865 |
| 688 | 0.825 | 0.917 | 0.871 | 0.745 | 0.908 | 0.865 |
| 689 | 0.825 | 0.917 | 0.871 | 0.745 | 0.908 | 0.865 |
| 690 | 0.825 | 0.917 | 0.871 | 0.745 | 0.908 | 0.865 |
| 691 | 0.825 | 0.917 | 0.871 | 0.745 | 0.908 | 0.865 |
| 692 | 0.825 | 0.917 | 0.871 | 0.745 | 0.908 | 0.865 |
| 693 | 0.825 | 0.917 | 0.871 | 0.745 | 0.908 | 0.865 |
| 694 | 0.825 | 0.917 | 0.871 | 0.745 | 0.908 | 0.865 |
| 695 | 0.825 | 0.917 | 0.871 | 0.745 | 0.908 | 0.865 |
| 696 | 0.825 | 0.917 | 0.871 | 0.745 | 0.908 | 0.865 |
| 697 | 0.825 | 0.917 | 0.871 | 0.745 | 0.908 | 0.865 |
| 698 | 0.825 | 0.917 | 0.871 | 0.745 | 0.908 | 0.865 |
| 699 | 0.825 | 0.917 | 0.871 | 0.745 | 0.908 | 0.865 |
| 700 | 0.825 | 0.917 | 0.871 | 0.745 | 0.908 | 0.865 |
| 701 | 0.825 | 0.917 | 0.871 | 0.745 | 0.908 | 0.865 |
| 702 | 0.825 | 0.917 | 0.871 | 0.745 | 0.908 | 0.865 |
| 703 | 0.825 | 0.917 | 0.871 | 0.745 | 0.908 | 0.865 |
| 704 | 0.825 | 0.917 | 0.871 | 0.745 | 0.908 | 0.865 |
| 705 | 0.825 | 0.917 | 0.871 | 0.745 | 0.908 | 0.865 |
| 706 | 0.825 | 0.917 | 0.871 | 0.745 | 0.908 | 0.865 |
| 707 | 0.825 | 0.917 | 0.871 | 0.745 | 0.908 | 0.865 |

|     |       |       |       |       |       |       |
|-----|-------|-------|-------|-------|-------|-------|
| 708 | 0.825 | 0.908 | 0.867 | 0.736 | 0.900 | 0.861 |
| 709 | 0.825 | 0.900 | 0.863 | 0.727 | 0.892 | 0.857 |
| 710 | 0.825 | 0.908 | 0.867 | 0.736 | 0.900 | 0.861 |
| 711 | 0.825 | 0.917 | 0.871 | 0.745 | 0.908 | 0.865 |
| 712 | 0.825 | 0.917 | 0.871 | 0.745 | 0.908 | 0.865 |
| 713 | 0.825 | 0.917 | 0.871 | 0.745 | 0.908 | 0.865 |
| 714 | 0.825 | 0.917 | 0.871 | 0.745 | 0.908 | 0.865 |
| 715 | 0.825 | 0.917 | 0.871 | 0.745 | 0.908 | 0.865 |
| 716 | 0.825 | 0.917 | 0.871 | 0.745 | 0.908 | 0.865 |
| 717 | 0.825 | 0.917 | 0.871 | 0.745 | 0.908 | 0.865 |
| 718 | 0.825 | 0.917 | 0.871 | 0.745 | 0.908 | 0.865 |
| 719 | 0.825 | 0.917 | 0.871 | 0.745 | 0.908 | 0.865 |
| 720 | 0.825 | 0.908 | 0.867 | 0.736 | 0.900 | 0.861 |
| 721 | 0.825 | 0.908 | 0.867 | 0.736 | 0.900 | 0.861 |
| 722 | 0.825 | 0.908 | 0.867 | 0.736 | 0.900 | 0.861 |
| 723 | 0.825 | 0.917 | 0.871 | 0.745 | 0.908 | 0.865 |
| 724 | 0.825 | 0.908 | 0.867 | 0.736 | 0.900 | 0.861 |
| 725 | 0.825 | 0.917 | 0.871 | 0.745 | 0.908 | 0.865 |
| 726 | 0.825 | 0.917 | 0.871 | 0.745 | 0.908 | 0.865 |
| 727 | 0.825 | 0.917 | 0.871 | 0.745 | 0.908 | 0.865 |
| 728 | 0.825 | 0.917 | 0.871 | 0.745 | 0.908 | 0.865 |
| 729 | 0.825 | 0.917 | 0.871 | 0.745 | 0.908 | 0.865 |
| 730 | 0.825 | 0.917 | 0.871 | 0.745 | 0.908 | 0.865 |
| 731 | 0.825 | 0.917 | 0.871 | 0.745 | 0.908 | 0.865 |
| 732 | 0.825 | 0.917 | 0.871 | 0.745 | 0.908 | 0.865 |
| 733 | 0.825 | 0.917 | 0.871 | 0.745 | 0.908 | 0.865 |
| 734 | 0.825 | 0.917 | 0.871 | 0.745 | 0.908 | 0.865 |
| 735 | 0.825 | 0.908 | 0.867 | 0.736 | 0.900 | 0.861 |
| 736 | 0.825 | 0.908 | 0.867 | 0.736 | 0.900 | 0.861 |
| 737 | 0.825 | 0.908 | 0.867 | 0.736 | 0.900 | 0.861 |
| 738 | 0.825 | 0.917 | 0.871 | 0.745 | 0.908 | 0.865 |
| 739 | 0.825 | 0.917 | 0.871 | 0.745 | 0.908 | 0.865 |
| 740 | 0.825 | 0.908 | 0.867 | 0.736 | 0.900 | 0.861 |
| 741 | 0.825 | 0.917 | 0.871 | 0.745 | 0.908 | 0.865 |
| 742 | 0.825 | 0.917 | 0.871 | 0.745 | 0.908 | 0.865 |
| 743 | 0.825 | 0.908 | 0.867 | 0.736 | 0.900 | 0.861 |
| 744 | 0.825 | 0.908 | 0.867 | 0.736 | 0.900 | 0.861 |
| 745 | 0.825 | 0.908 | 0.867 | 0.736 | 0.900 | 0.861 |
| 746 | 0.825 | 0.908 | 0.867 | 0.736 | 0.900 | 0.861 |
| 747 | 0.825 | 0.908 | 0.867 | 0.736 | 0.900 | 0.861 |
| 748 | 0.825 | 0.908 | 0.867 | 0.736 | 0.900 | 0.861 |
| 749 | 0.825 | 0.908 | 0.867 | 0.736 | 0.900 | 0.861 |

|     |       |       |       |       |       |       |
|-----|-------|-------|-------|-------|-------|-------|
| 750 | 0.825 | 0.908 | 0.867 | 0.736 | 0.900 | 0.861 |
| 751 | 0.825 | 0.908 | 0.867 | 0.736 | 0.900 | 0.861 |
| 752 | 0.825 | 0.908 | 0.867 | 0.736 | 0.900 | 0.861 |
| 753 | 0.825 | 0.908 | 0.867 | 0.736 | 0.900 | 0.861 |
| 754 | 0.825 | 0.908 | 0.867 | 0.736 | 0.900 | 0.861 |
| 755 | 0.825 | 0.908 | 0.867 | 0.736 | 0.900 | 0.861 |
| 756 | 0.825 | 0.908 | 0.867 | 0.736 | 0.900 | 0.861 |
| 757 | 0.825 | 0.908 | 0.867 | 0.736 | 0.900 | 0.861 |
| 758 | 0.825 | 0.908 | 0.867 | 0.736 | 0.900 | 0.861 |
| 759 | 0.825 | 0.900 | 0.863 | 0.727 | 0.892 | 0.857 |
| 760 | 0.825 | 0.908 | 0.867 | 0.736 | 0.900 | 0.861 |
| 761 | 0.825 | 0.908 | 0.867 | 0.736 | 0.900 | 0.861 |
| 762 | 0.825 | 0.908 | 0.867 | 0.736 | 0.900 | 0.861 |
| 763 | 0.825 | 0.908 | 0.867 | 0.736 | 0.900 | 0.861 |
| 764 | 0.833 | 0.908 | 0.871 | 0.744 | 0.901 | 0.866 |
| 765 | 0.833 | 0.908 | 0.871 | 0.744 | 0.901 | 0.866 |
| 766 | 0.833 | 0.900 | 0.867 | 0.735 | 0.893 | 0.862 |
| 767 | 0.833 | 0.908 | 0.871 | 0.744 | 0.901 | 0.866 |
| 768 | 0.833 | 0.908 | 0.871 | 0.744 | 0.901 | 0.866 |
| 769 | 0.833 | 0.908 | 0.871 | 0.744 | 0.901 | 0.866 |
| 770 | 0.833 | 0.908 | 0.871 | 0.744 | 0.901 | 0.866 |
| 771 | 0.833 | 0.908 | 0.871 | 0.744 | 0.901 | 0.866 |
| 772 | 0.833 | 0.908 | 0.871 | 0.744 | 0.901 | 0.866 |
| 773 | 0.833 | 0.900 | 0.867 | 0.735 | 0.893 | 0.862 |
| 774 | 0.833 | 0.900 | 0.867 | 0.735 | 0.893 | 0.862 |
| 775 | 0.833 | 0.900 | 0.867 | 0.735 | 0.893 | 0.862 |
| 776 | 0.833 | 0.900 | 0.867 | 0.735 | 0.893 | 0.862 |
| 777 | 0.833 | 0.900 | 0.867 | 0.735 | 0.893 | 0.862 |
| 778 | 0.833 | 0.900 | 0.867 | 0.735 | 0.893 | 0.862 |
| 779 | 0.833 | 0.900 | 0.867 | 0.735 | 0.893 | 0.862 |
| 780 | 0.833 | 0.900 | 0.867 | 0.735 | 0.893 | 0.862 |
| 781 | 0.833 | 0.900 | 0.867 | 0.735 | 0.893 | 0.862 |
| 782 | 0.833 | 0.900 | 0.867 | 0.735 | 0.893 | 0.862 |
| 783 | 0.833 | 0.900 | 0.867 | 0.735 | 0.893 | 0.862 |
| 784 | 0.833 | 0.900 | 0.867 | 0.735 | 0.893 | 0.862 |
| 785 | 0.833 | 0.900 | 0.867 | 0.735 | 0.893 | 0.862 |
| 786 | 0.833 | 0.900 | 0.867 | 0.735 | 0.893 | 0.862 |
| 787 | 0.833 | 0.900 | 0.867 | 0.735 | 0.893 | 0.862 |
| 788 | 0.833 | 0.900 | 0.867 | 0.735 | 0.893 | 0.862 |
| 789 | 0.833 | 0.900 | 0.867 | 0.735 | 0.893 | 0.862 |
| 790 | 0.833 | 0.900 | 0.867 | 0.735 | 0.893 | 0.862 |
| 791 | 0.833 | 0.900 | 0.867 | 0.735 | 0.893 | 0.862 |

|     |       |       |       |       |       |       |
|-----|-------|-------|-------|-------|-------|-------|
| 792 | 0.833 | 0.900 | 0.867 | 0.735 | 0.893 | 0.862 |
| 793 | 0.833 | 0.900 | 0.867 | 0.735 | 0.893 | 0.862 |
| 794 | 0.833 | 0.900 | 0.867 | 0.735 | 0.893 | 0.862 |
| 795 | 0.833 | 0.900 | 0.867 | 0.735 | 0.893 | 0.862 |
| 796 | 0.833 | 0.900 | 0.867 | 0.735 | 0.893 | 0.862 |
| 797 | 0.833 | 0.892 | 0.863 | 0.726 | 0.885 | 0.858 |
| 798 | 0.833 | 0.892 | 0.863 | 0.726 | 0.885 | 0.858 |
| 799 | 0.833 | 0.892 | 0.863 | 0.726 | 0.885 | 0.858 |
| 800 | 0.833 | 0.892 | 0.863 | 0.726 | 0.885 | 0.858 |
| 801 | 0.833 | 0.900 | 0.867 | 0.735 | 0.893 | 0.862 |
| 802 | 0.833 | 0.900 | 0.867 | 0.735 | 0.893 | 0.862 |
| 803 | 0.833 | 0.900 | 0.867 | 0.735 | 0.893 | 0.862 |
| 804 | 0.833 | 0.900 | 0.867 | 0.735 | 0.893 | 0.862 |
| 805 | 0.833 | 0.900 | 0.867 | 0.735 | 0.893 | 0.862 |
| 806 | 0.833 | 0.900 | 0.867 | 0.735 | 0.893 | 0.862 |
| 807 | 0.833 | 0.900 | 0.867 | 0.735 | 0.893 | 0.862 |
| 808 | 0.833 | 0.900 | 0.867 | 0.735 | 0.893 | 0.862 |
| 809 | 0.833 | 0.900 | 0.867 | 0.735 | 0.893 | 0.862 |
| 810 | 0.833 | 0.908 | 0.871 | 0.744 | 0.901 | 0.866 |
| 811 | 0.833 | 0.908 | 0.871 | 0.744 | 0.901 | 0.866 |
| 812 | 0.833 | 0.908 | 0.871 | 0.744 | 0.901 | 0.866 |
| 813 | 0.833 | 0.900 | 0.867 | 0.735 | 0.893 | 0.862 |
| 814 | 0.833 | 0.900 | 0.867 | 0.735 | 0.893 | 0.862 |
| 815 | 0.833 | 0.908 | 0.871 | 0.744 | 0.901 | 0.866 |
| 816 | 0.833 | 0.908 | 0.871 | 0.744 | 0.901 | 0.866 |
| 817 | 0.833 | 0.908 | 0.871 | 0.744 | 0.901 | 0.866 |
| 818 | 0.833 | 0.908 | 0.871 | 0.744 | 0.901 | 0.866 |
| 819 | 0.833 | 0.908 | 0.871 | 0.744 | 0.901 | 0.866 |
| 820 | 0.833 | 0.908 | 0.871 | 0.744 | 0.901 | 0.866 |
| 821 | 0.833 | 0.908 | 0.871 | 0.744 | 0.901 | 0.866 |
| 822 | 0.833 | 0.908 | 0.871 | 0.744 | 0.901 | 0.866 |
| 823 | 0.833 | 0.908 | 0.871 | 0.744 | 0.901 | 0.866 |
| 824 | 0.825 | 0.908 | 0.867 | 0.736 | 0.900 | 0.861 |
| 825 | 0.833 | 0.908 | 0.871 | 0.744 | 0.901 | 0.866 |
| 826 | 0.833 | 0.908 | 0.871 | 0.744 | 0.901 | 0.866 |
| 827 | 0.825 | 0.908 | 0.867 | 0.736 | 0.900 | 0.861 |
| 828 | 0.817 | 0.908 | 0.863 | 0.728 | 0.899 | 0.856 |
| 829 | 0.825 | 0.900 | 0.863 | 0.727 | 0.892 | 0.857 |
| 830 | 0.833 | 0.900 | 0.867 | 0.735 | 0.893 | 0.862 |
| 831 | 0.833 | 0.900 | 0.867 | 0.735 | 0.893 | 0.862 |
| 832 | 0.825 | 0.908 | 0.867 | 0.736 | 0.900 | 0.861 |
| 833 | 0.825 | 0.908 | 0.867 | 0.736 | 0.900 | 0.861 |

|     |       |       |       |       |       |       |
|-----|-------|-------|-------|-------|-------|-------|
| 834 | 0.825 | 0.900 | 0.863 | 0.727 | 0.892 | 0.857 |
| 835 | 0.825 | 0.900 | 0.863 | 0.727 | 0.892 | 0.857 |
| 836 | 0.825 | 0.900 | 0.863 | 0.727 | 0.892 | 0.857 |
| 837 | 0.825 | 0.900 | 0.863 | 0.727 | 0.892 | 0.857 |
| 838 | 0.825 | 0.900 | 0.863 | 0.727 | 0.892 | 0.857 |
| 839 | 0.825 | 0.900 | 0.863 | 0.727 | 0.892 | 0.857 |
| 840 | 0.825 | 0.908 | 0.867 | 0.736 | 0.900 | 0.861 |
| 841 | 0.825 | 0.908 | 0.867 | 0.736 | 0.900 | 0.861 |
| 842 | 0.825 | 0.900 | 0.863 | 0.727 | 0.892 | 0.857 |
| 843 | 0.825 | 0.900 | 0.863 | 0.727 | 0.892 | 0.857 |
| 844 | 0.817 | 0.900 | 0.858 | 0.719 | 0.891 | 0.852 |
| 845 | 0.825 | 0.900 | 0.863 | 0.727 | 0.892 | 0.857 |
| 846 | 0.825 | 0.900 | 0.863 | 0.727 | 0.892 | 0.857 |
| 847 | 0.825 | 0.908 | 0.867 | 0.736 | 0.900 | 0.861 |
| 848 | 0.825 | 0.900 | 0.863 | 0.727 | 0.892 | 0.857 |
| 849 | 0.825 | 0.900 | 0.863 | 0.727 | 0.892 | 0.857 |
| 850 | 0.825 | 0.900 | 0.863 | 0.727 | 0.892 | 0.857 |
| 851 | 0.825 | 0.900 | 0.863 | 0.727 | 0.892 | 0.857 |
| 852 | 0.825 | 0.900 | 0.863 | 0.727 | 0.892 | 0.857 |
| 853 | 0.825 | 0.900 | 0.863 | 0.727 | 0.892 | 0.857 |
| 854 | 0.825 | 0.900 | 0.863 | 0.727 | 0.892 | 0.857 |
| 855 | 0.825 | 0.900 | 0.863 | 0.727 | 0.892 | 0.857 |
| 856 | 0.825 | 0.900 | 0.863 | 0.727 | 0.892 | 0.857 |
| 857 | 0.825 | 0.900 | 0.863 | 0.727 | 0.892 | 0.857 |
| 858 | 0.825 | 0.900 | 0.863 | 0.727 | 0.892 | 0.857 |
| 859 | 0.825 | 0.900 | 0.863 | 0.727 | 0.892 | 0.857 |
| 860 | 0.825 | 0.900 | 0.863 | 0.727 | 0.892 | 0.857 |
| 861 | 0.825 | 0.900 | 0.863 | 0.727 | 0.892 | 0.857 |
| 862 | 0.825 | 0.900 | 0.863 | 0.727 | 0.892 | 0.857 |
| 863 | 0.825 | 0.900 | 0.863 | 0.727 | 0.892 | 0.857 |
| 864 | 0.825 | 0.900 | 0.863 | 0.727 | 0.892 | 0.857 |
| 865 | 0.825 | 0.900 | 0.863 | 0.727 | 0.892 | 0.857 |
| 866 | 0.825 | 0.900 | 0.863 | 0.727 | 0.892 | 0.857 |
| 867 | 0.825 | 0.900 | 0.863 | 0.727 | 0.892 | 0.857 |
| 868 | 0.825 | 0.900 | 0.863 | 0.727 | 0.892 | 0.857 |
| 869 | 0.825 | 0.900 | 0.863 | 0.727 | 0.892 | 0.857 |
| 870 | 0.825 | 0.900 | 0.863 | 0.727 | 0.892 | 0.857 |
| 871 | 0.825 | 0.900 | 0.863 | 0.727 | 0.892 | 0.857 |
| 872 | 0.825 | 0.900 | 0.863 | 0.727 | 0.892 | 0.857 |
| 873 | 0.825 | 0.900 | 0.863 | 0.727 | 0.892 | 0.857 |
| 874 | 0.825 | 0.900 | 0.863 | 0.727 | 0.892 | 0.857 |
| 875 | 0.825 | 0.900 | 0.863 | 0.727 | 0.892 | 0.857 |

|     |       |       |       |       |       |       |
|-----|-------|-------|-------|-------|-------|-------|
| 876 | 0.825 | 0.900 | 0.863 | 0.727 | 0.892 | 0.857 |
| 877 | 0.825 | 0.892 | 0.858 | 0.718 | 0.884 | 0.853 |
| 878 | 0.825 | 0.892 | 0.858 | 0.718 | 0.884 | 0.853 |
| 879 | 0.825 | 0.892 | 0.858 | 0.718 | 0.884 | 0.853 |
| 880 | 0.825 | 0.892 | 0.858 | 0.718 | 0.884 | 0.853 |
| 881 | 0.817 | 0.900 | 0.858 | 0.719 | 0.891 | 0.852 |
| 882 | 0.825 | 0.900 | 0.863 | 0.727 | 0.892 | 0.857 |
| 883 | 0.817 | 0.900 | 0.858 | 0.719 | 0.891 | 0.852 |
| 884 | 0.817 | 0.892 | 0.854 | 0.710 | 0.883 | 0.848 |
| 885 | 0.817 | 0.892 | 0.854 | 0.710 | 0.883 | 0.848 |
| 886 | 0.825 | 0.892 | 0.858 | 0.718 | 0.884 | 0.853 |
| 887 | 0.817 | 0.892 | 0.854 | 0.710 | 0.883 | 0.848 |
| 888 | 0.825 | 0.892 | 0.858 | 0.718 | 0.884 | 0.853 |
| 889 | 0.825 | 0.892 | 0.858 | 0.718 | 0.884 | 0.853 |
| 890 | 0.825 | 0.892 | 0.858 | 0.718 | 0.884 | 0.853 |
| 891 | 0.825 | 0.892 | 0.858 | 0.718 | 0.884 | 0.853 |
| 892 | 0.825 | 0.892 | 0.858 | 0.718 | 0.884 | 0.853 |
| 893 | 0.825 | 0.892 | 0.858 | 0.718 | 0.884 | 0.853 |
| 894 | 0.825 | 0.892 | 0.858 | 0.718 | 0.884 | 0.853 |
| 895 | 0.825 | 0.892 | 0.858 | 0.718 | 0.884 | 0.853 |
| 896 | 0.825 | 0.892 | 0.858 | 0.718 | 0.884 | 0.853 |
| 897 | 0.825 | 0.892 | 0.858 | 0.718 | 0.884 | 0.853 |
| 898 | 0.825 | 0.892 | 0.858 | 0.718 | 0.884 | 0.853 |
| 899 | 0.825 | 0.892 | 0.858 | 0.718 | 0.884 | 0.853 |
| 900 | 0.825 | 0.892 | 0.858 | 0.718 | 0.884 | 0.853 |
| 901 | 0.825 | 0.892 | 0.858 | 0.718 | 0.884 | 0.853 |
| 902 | 0.825 | 0.892 | 0.858 | 0.718 | 0.884 | 0.853 |
| 903 | 0.817 | 0.892 | 0.854 | 0.710 | 0.883 | 0.848 |
| 904 | 0.825 | 0.892 | 0.858 | 0.718 | 0.884 | 0.853 |
| 905 | 0.825 | 0.892 | 0.858 | 0.718 | 0.884 | 0.853 |
| 906 | 0.825 | 0.892 | 0.858 | 0.718 | 0.884 | 0.853 |
| 907 | 0.825 | 0.892 | 0.858 | 0.718 | 0.884 | 0.853 |
| 908 | 0.825 | 0.892 | 0.858 | 0.718 | 0.884 | 0.853 |
| 909 | 0.825 | 0.892 | 0.858 | 0.718 | 0.884 | 0.853 |
| 910 | 0.825 | 0.892 | 0.858 | 0.718 | 0.884 | 0.853 |
| 911 | 0.825 | 0.892 | 0.858 | 0.718 | 0.884 | 0.853 |
| 912 | 0.817 | 0.892 | 0.854 | 0.710 | 0.883 | 0.848 |
| 913 | 0.817 | 0.892 | 0.854 | 0.710 | 0.883 | 0.848 |
| 914 | 0.817 | 0.892 | 0.854 | 0.710 | 0.883 | 0.848 |
| 915 | 0.817 | 0.892 | 0.854 | 0.710 | 0.883 | 0.848 |
| 916 | 0.817 | 0.892 | 0.854 | 0.710 | 0.883 | 0.848 |
| 917 | 0.817 | 0.892 | 0.854 | 0.710 | 0.883 | 0.848 |

|     |       |       |       |       |       |       |
|-----|-------|-------|-------|-------|-------|-------|
| 918 | 0.817 | 0.892 | 0.854 | 0.710 | 0.883 | 0.848 |
| 919 | 0.817 | 0.892 | 0.854 | 0.710 | 0.883 | 0.848 |
| 920 | 0.817 | 0.892 | 0.854 | 0.710 | 0.883 | 0.848 |
| 921 | 0.817 | 0.892 | 0.854 | 0.710 | 0.883 | 0.848 |
| 922 | 0.808 | 0.892 | 0.850 | 0.702 | 0.882 | 0.843 |
| 923 | 0.817 | 0.892 | 0.854 | 0.710 | 0.883 | 0.848 |
| 924 | 0.817 | 0.892 | 0.854 | 0.710 | 0.883 | 0.848 |
| 925 | 0.817 | 0.892 | 0.854 | 0.710 | 0.883 | 0.848 |
| 926 | 0.817 | 0.892 | 0.854 | 0.710 | 0.883 | 0.848 |
| 927 | 0.817 | 0.892 | 0.854 | 0.710 | 0.883 | 0.848 |
| 928 | 0.817 | 0.892 | 0.854 | 0.710 | 0.883 | 0.848 |
| 929 | 0.817 | 0.892 | 0.854 | 0.710 | 0.883 | 0.848 |
| 930 | 0.817 | 0.892 | 0.854 | 0.710 | 0.883 | 0.848 |
| 931 | 0.825 | 0.892 | 0.858 | 0.718 | 0.884 | 0.853 |
| 932 | 0.825 | 0.892 | 0.858 | 0.718 | 0.884 | 0.853 |
| 933 | 0.825 | 0.892 | 0.858 | 0.718 | 0.884 | 0.853 |
| 934 | 0.825 | 0.892 | 0.858 | 0.718 | 0.884 | 0.853 |
| 935 | 0.825 | 0.892 | 0.858 | 0.718 | 0.884 | 0.853 |
| 936 | 0.825 | 0.892 | 0.858 | 0.718 | 0.884 | 0.853 |
| 937 | 0.825 | 0.892 | 0.858 | 0.718 | 0.884 | 0.853 |
| 938 | 0.825 | 0.892 | 0.858 | 0.718 | 0.884 | 0.853 |
| 939 | 0.825 | 0.892 | 0.858 | 0.718 | 0.884 | 0.853 |
| 940 | 0.817 | 0.892 | 0.854 | 0.710 | 0.883 | 0.848 |
| 941 | 0.825 | 0.892 | 0.858 | 0.718 | 0.884 | 0.853 |
| 942 | 0.825 | 0.892 | 0.858 | 0.718 | 0.884 | 0.853 |
| 943 | 0.817 | 0.892 | 0.854 | 0.710 | 0.883 | 0.848 |
| 944 | 0.825 | 0.892 | 0.858 | 0.718 | 0.884 | 0.853 |
| 945 | 0.825 | 0.892 | 0.858 | 0.718 | 0.884 | 0.853 |
| 946 | 0.817 | 0.892 | 0.854 | 0.710 | 0.883 | 0.848 |
| 947 | 0.817 | 0.892 | 0.854 | 0.710 | 0.883 | 0.848 |
| 948 | 0.817 | 0.892 | 0.854 | 0.710 | 0.883 | 0.848 |
| 949 | 0.817 | 0.892 | 0.854 | 0.710 | 0.883 | 0.848 |
| 950 | 0.817 | 0.892 | 0.854 | 0.710 | 0.883 | 0.848 |
| 951 | 0.817 | 0.892 | 0.854 | 0.710 | 0.883 | 0.848 |
| 952 | 0.817 | 0.892 | 0.854 | 0.710 | 0.883 | 0.848 |
| 953 | 0.817 | 0.892 | 0.854 | 0.710 | 0.883 | 0.848 |
| 954 | 0.817 | 0.892 | 0.854 | 0.710 | 0.883 | 0.848 |
| 955 | 0.817 | 0.892 | 0.854 | 0.710 | 0.883 | 0.848 |
| 956 | 0.817 | 0.892 | 0.854 | 0.710 | 0.883 | 0.848 |
| 957 | 0.817 | 0.892 | 0.854 | 0.710 | 0.883 | 0.848 |
| 958 | 0.817 | 0.892 | 0.854 | 0.710 | 0.883 | 0.848 |
| 959 | 0.817 | 0.892 | 0.854 | 0.710 | 0.883 | 0.848 |



|      |       |       |       |       |       |       |
|------|-------|-------|-------|-------|-------|-------|
| 960  | 0.817 | 0.892 | 0.854 | 0.710 | 0.883 | 0.848 |
| 961  | 0.817 | 0.892 | 0.854 | 0.710 | 0.883 | 0.848 |
| 962  | 0.817 | 0.892 | 0.854 | 0.710 | 0.883 | 0.848 |
| 963  | 0.817 | 0.892 | 0.854 | 0.710 | 0.883 | 0.848 |
| 964  | 0.817 | 0.892 | 0.854 | 0.710 | 0.883 | 0.848 |
| 965  | 0.817 | 0.892 | 0.854 | 0.710 | 0.883 | 0.848 |
| 966  | 0.817 | 0.892 | 0.854 | 0.710 | 0.883 | 0.848 |
| 967  | 0.817 | 0.892 | 0.854 | 0.710 | 0.883 | 0.848 |
| 968  | 0.817 | 0.892 | 0.854 | 0.710 | 0.883 | 0.848 |
| 969  | 0.817 | 0.892 | 0.854 | 0.710 | 0.883 | 0.848 |
| 970  | 0.817 | 0.892 | 0.854 | 0.710 | 0.883 | 0.848 |
| 971  | 0.817 | 0.892 | 0.854 | 0.710 | 0.883 | 0.848 |
| 972  | 0.817 | 0.892 | 0.854 | 0.710 | 0.883 | 0.848 |
| 973  | 0.817 | 0.892 | 0.854 | 0.710 | 0.883 | 0.848 |
| 974  | 0.817 | 0.892 | 0.854 | 0.710 | 0.883 | 0.848 |
| 975  | 0.817 | 0.892 | 0.854 | 0.710 | 0.883 | 0.848 |
| 976  | 0.817 | 0.892 | 0.854 | 0.710 | 0.883 | 0.848 |
| 977  | 0.817 | 0.892 | 0.854 | 0.710 | 0.883 | 0.848 |
| 978  | 0.825 | 0.892 | 0.858 | 0.718 | 0.884 | 0.853 |
| 979  | 0.817 | 0.892 | 0.854 | 0.710 | 0.883 | 0.848 |
| 980  | 0.825 | 0.892 | 0.858 | 0.718 | 0.884 | 0.853 |
| 981  | 0.825 | 0.892 | 0.858 | 0.718 | 0.884 | 0.853 |
| 982  | 0.817 | 0.892 | 0.854 | 0.710 | 0.883 | 0.848 |
| 983  | 0.817 | 0.892 | 0.854 | 0.710 | 0.883 | 0.848 |
| 984  | 0.817 | 0.892 | 0.854 | 0.710 | 0.883 | 0.848 |
| 985  | 0.825 | 0.892 | 0.858 | 0.718 | 0.884 | 0.853 |
| 986  | 0.825 | 0.892 | 0.858 | 0.718 | 0.884 | 0.853 |
| 987  | 0.825 | 0.900 | 0.863 | 0.727 | 0.892 | 0.857 |
| 988  | 0.825 | 0.900 | 0.863 | 0.727 | 0.892 | 0.857 |
| 989  | 0.825 | 0.900 | 0.863 | 0.727 | 0.892 | 0.857 |
| 990  | 0.825 | 0.900 | 0.863 | 0.727 | 0.892 | 0.857 |
| 991  | 0.825 | 0.892 | 0.858 | 0.718 | 0.884 | 0.853 |
| 992  | 0.825 | 0.892 | 0.858 | 0.718 | 0.884 | 0.853 |
| 993  | 0.825 | 0.892 | 0.858 | 0.718 | 0.884 | 0.853 |
| 994  | 0.825 | 0.883 | 0.854 | 0.710 | 0.876 | 0.850 |
| 995  | 0.825 | 0.883 | 0.854 | 0.710 | 0.876 | 0.850 |
| 996  | 0.825 | 0.883 | 0.854 | 0.710 | 0.876 | 0.850 |
| 997  | 0.825 | 0.883 | 0.854 | 0.710 | 0.876 | 0.850 |
| 998  | 0.825 | 0.875 | 0.850 | 0.701 | 0.868 | 0.846 |
| 999  | 0.825 | 0.875 | 0.850 | 0.701 | 0.868 | 0.846 |
| 1000 | 0.825 | 0.875 | 0.850 | 0.701 | 0.868 | 0.846 |
| 1001 | 0.825 | 0.875 | 0.850 | 0.701 | 0.868 | 0.846 |

|      |       |       |       |       |       |       |
|------|-------|-------|-------|-------|-------|-------|
| 1002 | 0.825 | 0.875 | 0.850 | 0.701 | 0.868 | 0.846 |
| 1003 | 0.825 | 0.875 | 0.850 | 0.701 | 0.868 | 0.846 |
| 1004 | 0.825 | 0.875 | 0.850 | 0.701 | 0.868 | 0.846 |
| 1005 | 0.825 | 0.875 | 0.850 | 0.701 | 0.868 | 0.846 |
| 1006 | 0.825 | 0.875 | 0.850 | 0.701 | 0.868 | 0.846 |
| 1007 | 0.825 | 0.875 | 0.850 | 0.701 | 0.868 | 0.846 |
| 1008 | 0.825 | 0.875 | 0.850 | 0.701 | 0.868 | 0.846 |
| 1009 | 0.825 | 0.883 | 0.854 | 0.710 | 0.876 | 0.850 |
| 1010 | 0.825 | 0.883 | 0.854 | 0.710 | 0.876 | 0.850 |
| 1011 | 0.825 | 0.883 | 0.854 | 0.710 | 0.876 | 0.850 |
| 1012 | 0.825 | 0.883 | 0.854 | 0.710 | 0.876 | 0.850 |
| 1013 | 0.825 | 0.883 | 0.854 | 0.710 | 0.876 | 0.850 |
| 1014 | 0.825 | 0.883 | 0.854 | 0.710 | 0.876 | 0.850 |
| 1015 | 0.825 | 0.883 | 0.854 | 0.710 | 0.876 | 0.850 |
| 1016 | 0.825 | 0.883 | 0.854 | 0.710 | 0.876 | 0.850 |
| 1017 | 0.825 | 0.883 | 0.854 | 0.710 | 0.876 | 0.850 |
| 1018 | 0.825 | 0.883 | 0.854 | 0.710 | 0.876 | 0.850 |
| 1019 | 0.825 | 0.883 | 0.854 | 0.710 | 0.876 | 0.850 |
| 1020 | 0.825 | 0.883 | 0.854 | 0.710 | 0.876 | 0.850 |
