# Supplementary material for: Predicting RNA 5-Methylcytosine Sites by Using Essential Sequence Features and Distributions
Source: Biomed Res Int. 2022 Jan 13;2022:4035462. doi: 10.1155/2022/4035462 (PMC8776474; doi:10.1155/2022/4035462)
Supplement: Supplementary Materials — Supplementary Material S1: performance of IFS for mouse m5C sites. Supplementary Material S2: performance of IFS for human m5C sites. [file 4035462.f1.zip]

Archive with 2 entries (2 files):
- Supp-S1 (1).pdf
- Supp-S2 (1).pdf
